# Supplementary material for: Synthesis and Biological Evaluation of Substituted Fused Dipyranoquinolinones
Source: MDPI journal article supplement (doi:10.3390/org4030027), 2023-07-10

# Synthesis and Biological Evaluation of Substituted Fused Dipyranoquinolinones

Evangelia-Eirini N. Vlachou <sup>1</sup>, Eleni Pontiki <sup>2</sup>, Dimitra J. Hadjipavlou-Litina <sup>2,\*</sup> and Konstantinos E. Litinas <sup>1,\*</sup>

<sup>1</sup> Laboratory of Organic Chemistry, Department of Chemistry, Aristotle University of Thessaloniki, 54124 Thessaloniki, Greece

<sup>2</sup> Department of Pharmaceutical Chemistry, School of Pharmacy, Faculty of Health Sciences, Aristotle University of Thessaloniki, 54124 Thessaloniki, Greece

\* Correspondence: hadjipav@pharm.auth.gr (D.J.H.-L.); klitinas@chem.auth.gr (K.E.L.)

## **<sup>1</sup>H-NMR and <sup>13</sup>C-NMR Spectra for the compounds:**

|                                                                                        |    |
|----------------------------------------------------------------------------------------|----|
| 6-Hydroxy-8-methyl-3H-pyrano[3,2-f]quinolin-3-one (3a).....                            | 3  |
| 6-Hydroxy-1,8-dimethyl-3H-pyrano[3,2-f]quinolin-3-one (3b).....                        | 5  |
| 6-Hydroxy-8-methyl-2H-pyrano[2,3-f]quinolin-2-one (4a).....                            | 7  |
| 6-Hydroxy-4,8-dimethyl-2H-pyrano[2,3-f]quinolin-2-one (4b).....                        | 8  |
| 1-Hydroxy-10-methyl-3H-pyrano[3,2-f]quinolin-3-one (5).....                            | 11 |
| 8-Methyl-6-(prop-2-yn-1-yloxy)-3H-pyrano[3,2-f]quinolin-3-one (7a).....                | 13 |
| 1,8-Dimethyl-6-(prop-2-yn-1-yloxy)-3H-pyrano[3,2-f]quinolin-3-one (7b).....            | 14 |
| 8-Methyl-6-(prop-2-yn-yloxy)-2H-pyrano[2,3-f]quinolin-2-one (8a).....                  | 15 |
| 4,8-Dimethyl-6-(prop-2-yn-1-yloxy)-2H-pyrano[2,3-f]quinolin-2-one (8b).....            | 17 |
| 10-Methyl-1-(prop-2-yn-1-yloxy)-3H-pyrano[3,2-f]quinolin-3-one (9).....                | 19 |
| 11-methyl-2H,6H-dipyrano[3,2-f:3',2'-h]quinolin-6-one (10a).....                       | 20 |
| 8,11-Dimethyl-2H,6H-dipyrano[3,2-f:3',2'-h]quinolin-6-one (10b).....                   | 21 |
| 2-Methyldipyrano[2,3-f:3',2'-h]quinolin-6(11H)-one (12a).....                          | 23 |
| 2,8-Dimethyldipyrano[2,3-f:3',2'-h]quinolin-6(11H)-one (12b).....                      | 24 |
| 12-Methyl-4H,5H-pyrano[2',3':4,5]pyrano[3,2-f]quinolin-5-one (14).....                 | 25 |
| 2,10-dimethyl-5H-furo[3,2-h]pyrano[3,2-f]quinolin-5-one (11a).....                     | 26 |
| 2,7,10-Trimethyl-5H-furo[3,2-h]pyrano[3,2-f]quinolin-5-one (11b).....                  | 27 |
| 2,10-Dimethyl-6H-furo[3,2-h]pyrano[2,3-f]quinolin-6-one (13a).....                     | 28 |
| 2,8,10-Trimethyl-6H-furo[3,2-h]pyrano[2,3-f]quinolin-6-one (13b).....                  | 29 |
| 2,11-Dimethyl-4H-furo[2',3':4,5]pyrano[3,2-f]quinolin-4-one (15).....                  | 30 |
| 6-hydroxy-8,10-diphenyl-3H-pyrano[3,2-f]quinolin-3-one (18a).....                      | 31 |
| 6-Hydroxy-1-methyl-8,10-diphenyl-3H-pyrano[3,2-f]quinolin-3-one (18b).....             | 32 |
| 6-Hydroxy-8,10-diphenyl-2H-pyrano[2,3-f]quinolin-2-one (20a).....                      | 33 |
| 2-Phenyl-6H-chromeno[7,6-d]oxazol-6-one (21a).....                                     | 34 |
| 6-Hydroxy-4-methyl-8,10-diphenyl-2H-pyrano[2,3-f]quinolin-2-one (20b).....             | 35 |
| 8-Methyl-2-phenyl-6H-chromeno[7,6-d]oxazol-6-one (21b).....                            | 36 |
| 1-Hydroxy-8,10-diphenyl-3H-pyrano[3,2-f]quinolin-3-one (22).....                       | 37 |
| 2,4,10,12-Tetraphenyl-4H,5H-pyrano[2',3':4,5]pyrano[3,2-f]quinolin-5-one (23).....     | 38 |
| 8,10-Diphenyl-6-(prop-2-yn-1-yloxy)-3H-pyrano[3,2-f]quinolin-3-one (24a).....          | 39 |
| 1-Methyl-8,10-diphenyl-6-(prop-2-yn-1-yloxy)-3H-pyrano[3,2-f]quinolin-3-one (24b)..... | 40 |
| 8,10-Diphenyl-6-(prop-2-yn-1-yloxy)-2H-pyrano[2,3-f]quinolin-2-one (25a).....          | 41 |
| 4-Methyl-8,10-diphenyl-6-(prop-2-yn-1-yloxy)-2H-pyrano[2,3-f]quinolin-2-one (25b)..... | 42 |
| 8,10-Diphenyl-1-(prop-2-yn-1-yloxy)-3H-pyrano[3,2-f]quinolin-3-one (26).....           | 43 |
| 9,11-Diphenyl-2H,6H-dipyrano[3,2-f:3',2'-h]quinolin-6-one (27a).....                   | 44 |
| 8-Methyl-9,11-diphenyl-2H,6H-dipyrano[3,2-f:3',2'-h]quinolin-6-one (27b).....          | 45 |
| 2,4-Diphenyldipyrano[2,3-f:3',2'-h]quinolin-6(11H)-one (28a).....                      | 46 |
| 8-Methyl-2,4-diphenyldipyrano[2,3-f:3',2'-h]quinolin-6(11H)-one (28b).....             | 47 |
| 10,12-Diphenyl-2H,5H-pyrano[2',3':4,5]pyrano[3,2-f]quinolin-5-one (29).....            | 48 |

# PROTON

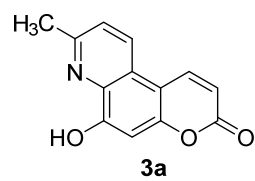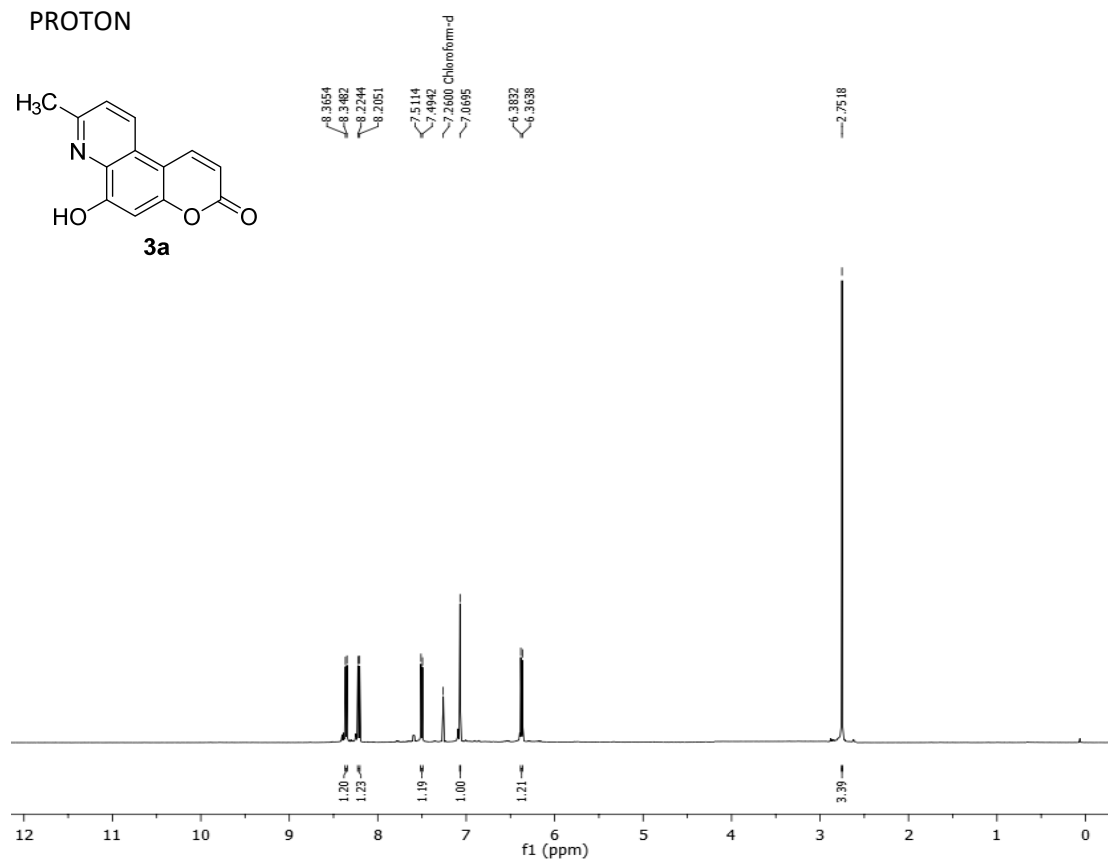

# CARBON

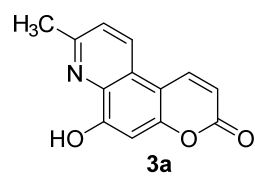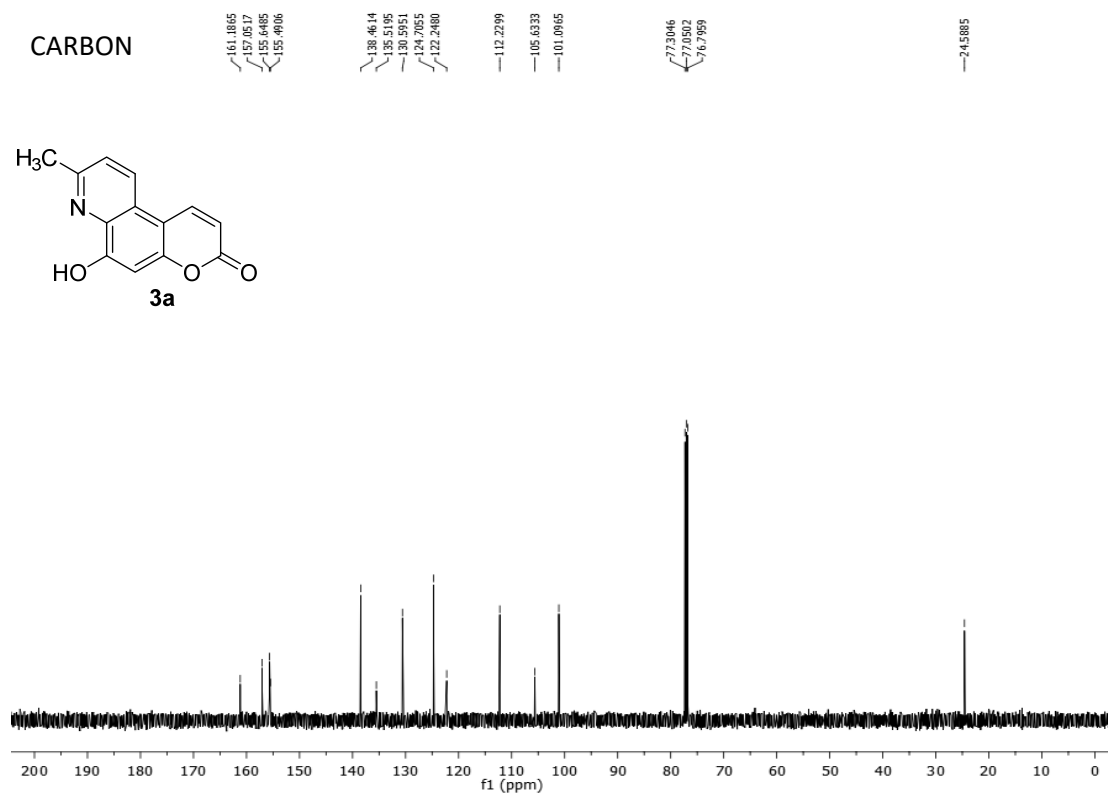

# NOESY-1D

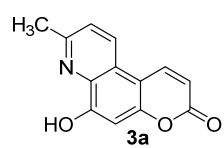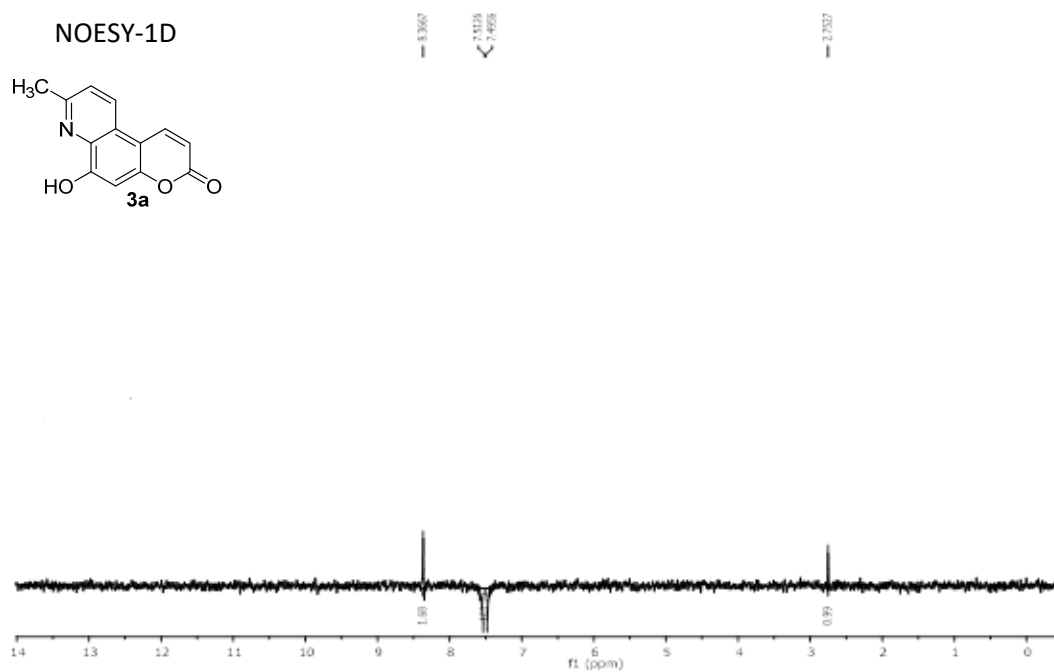

# PROTON

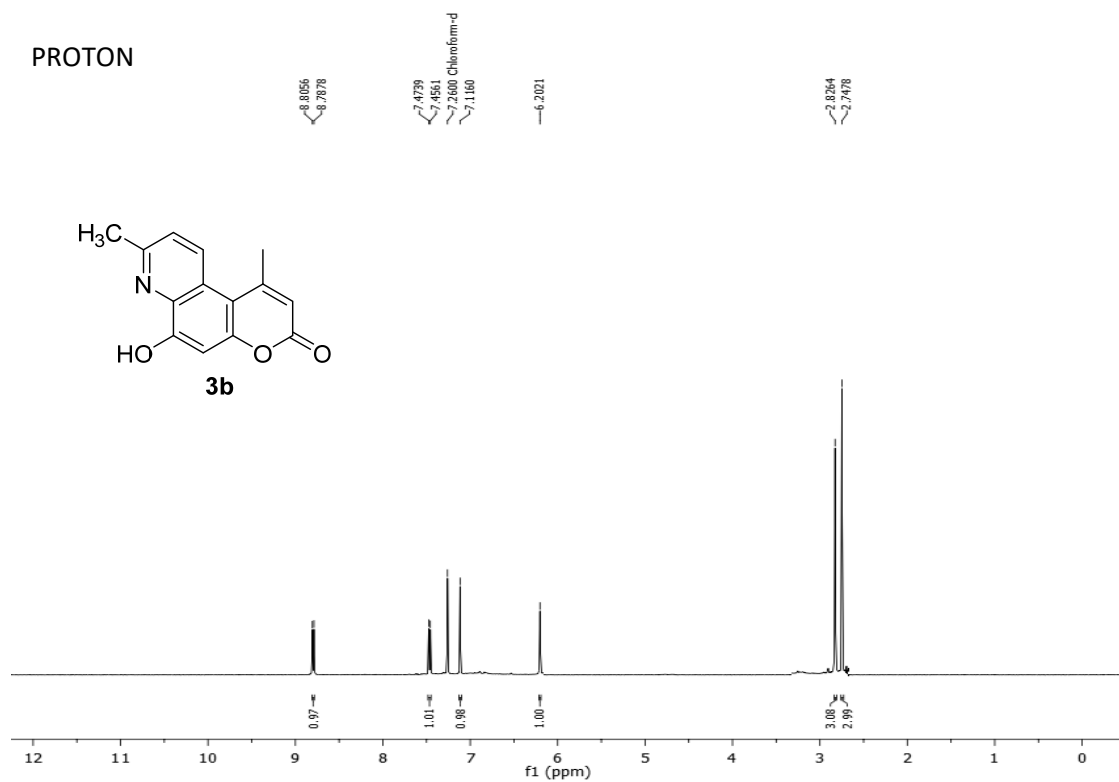

# CARBON

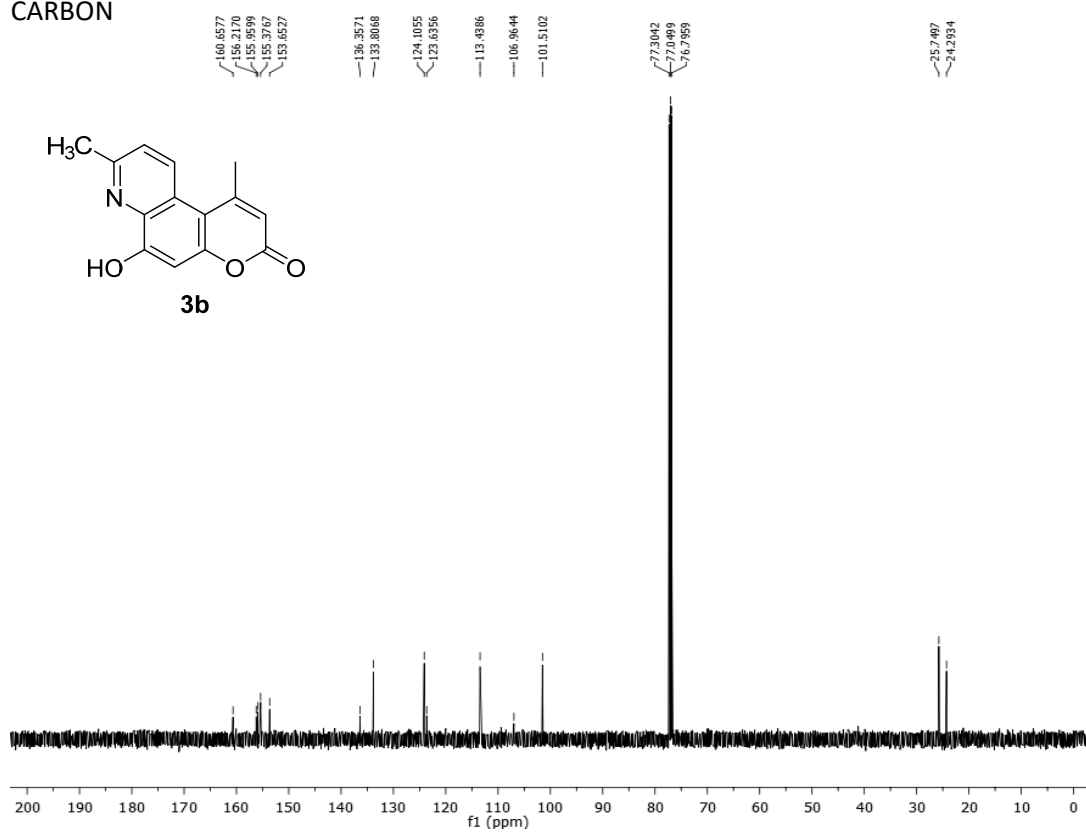

# NOESY-1D

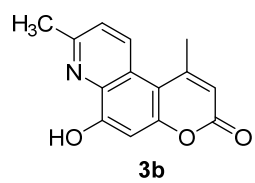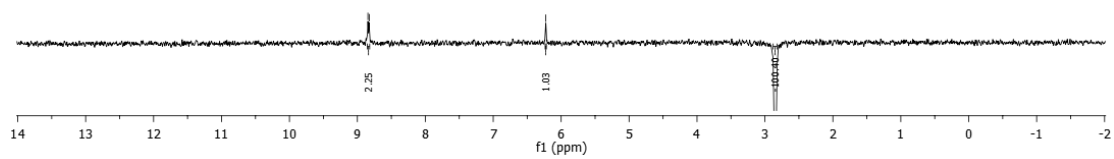

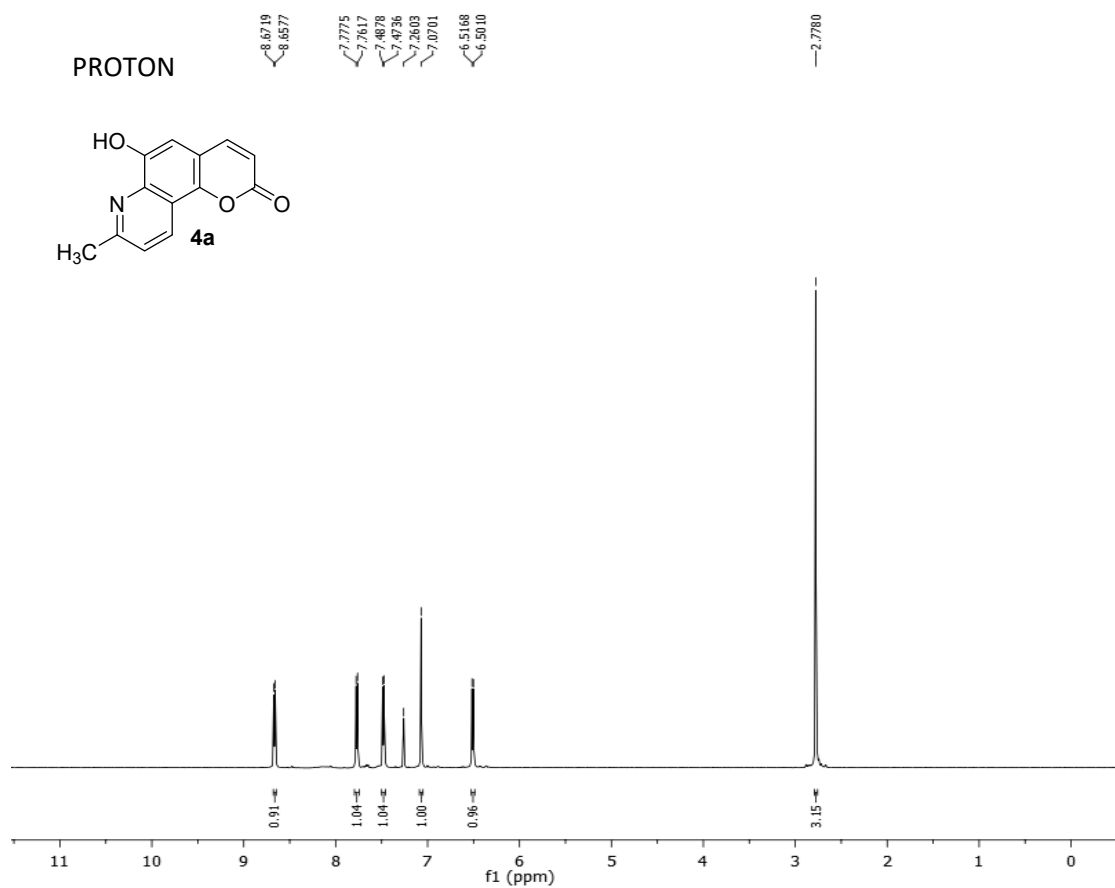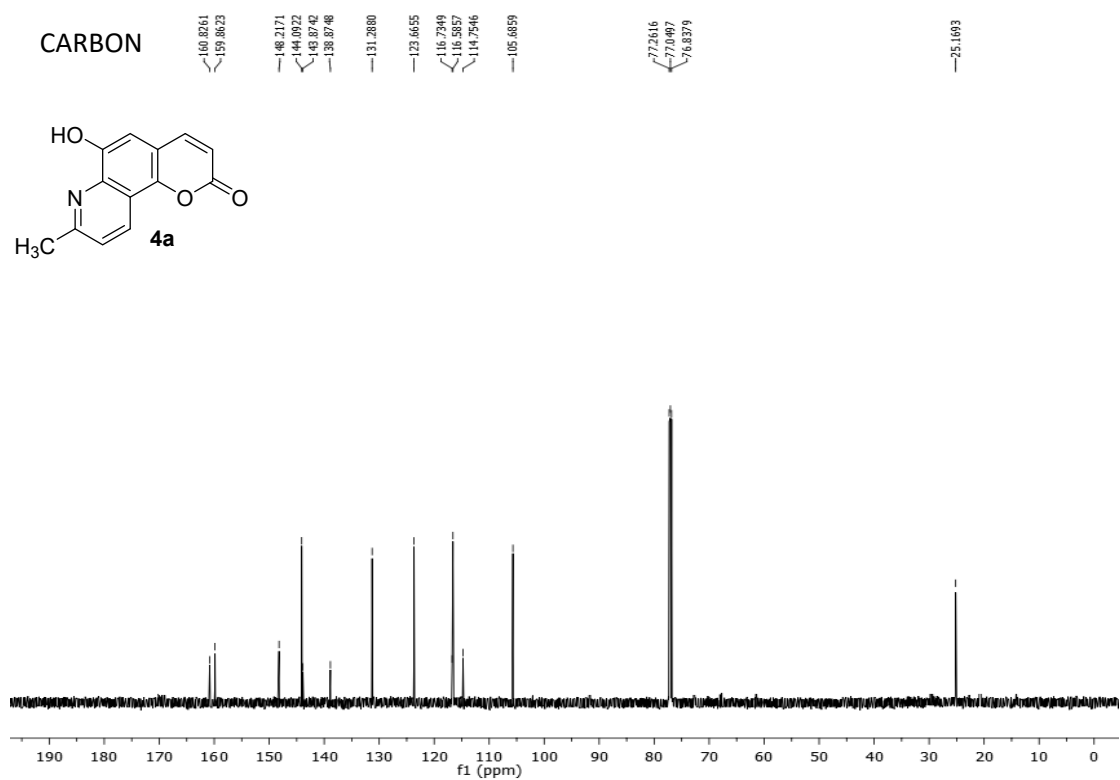

# PROTON

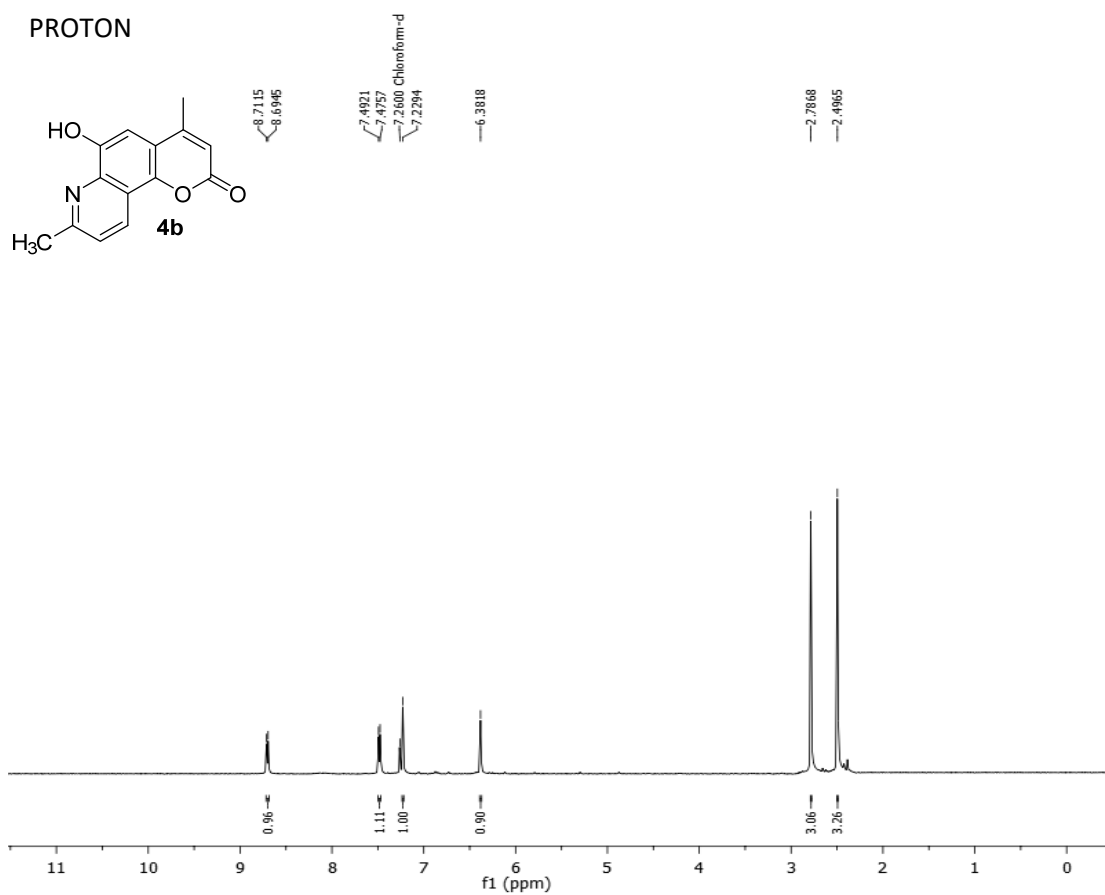

# CARBON

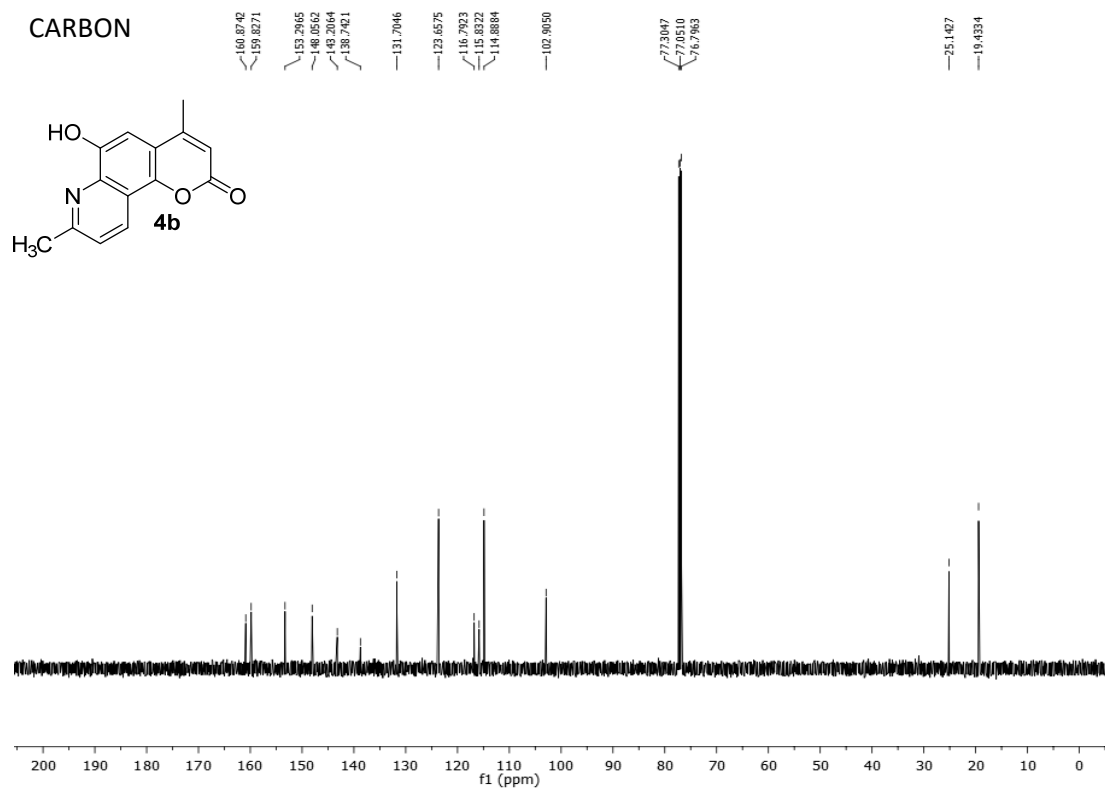



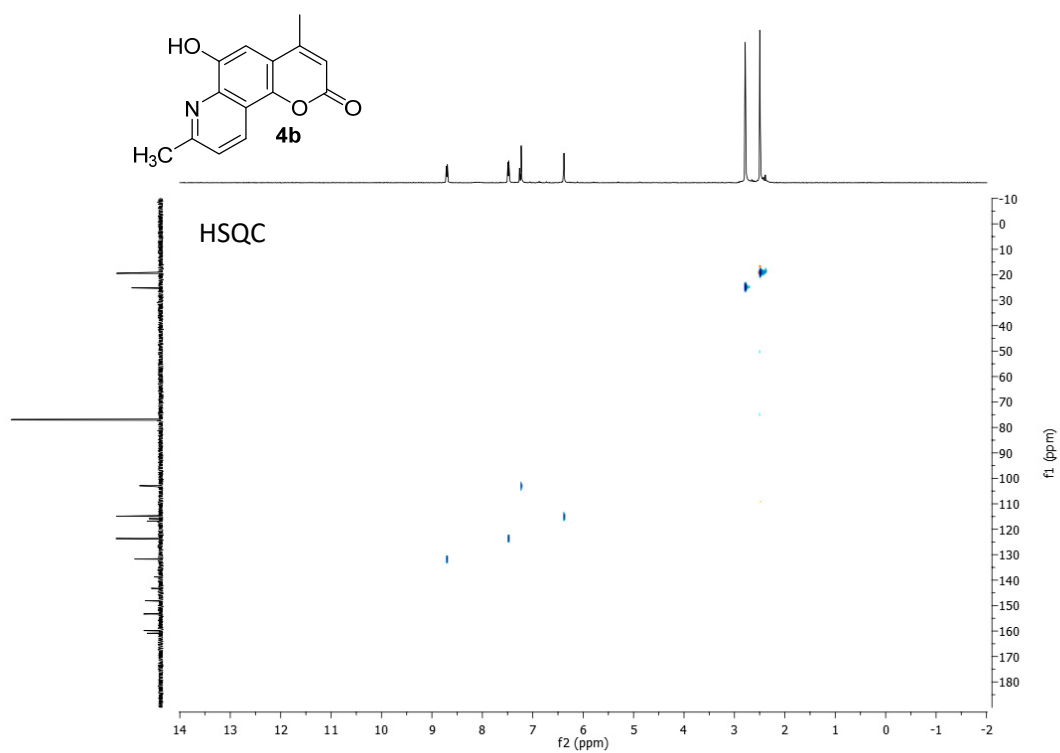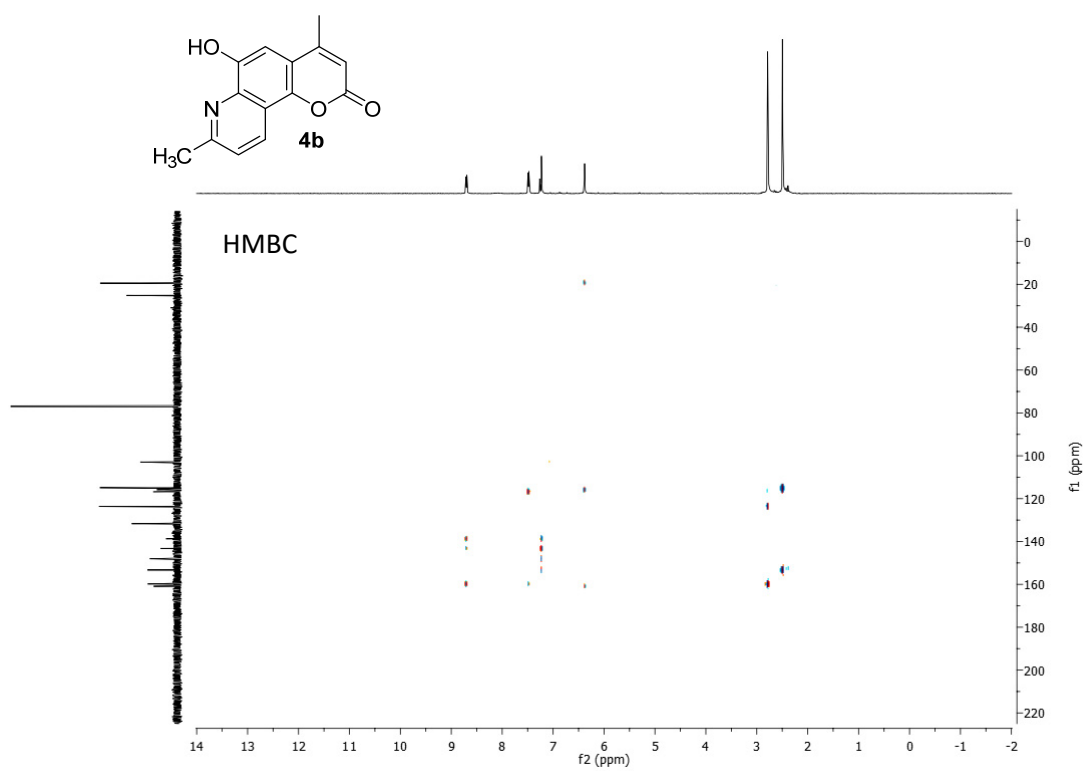

NOESY-1D

—8.6991

↙7.4854  
↘7.4684

—2.7807

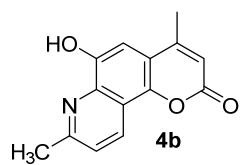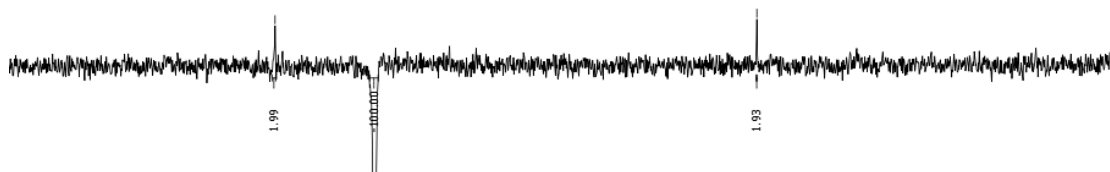

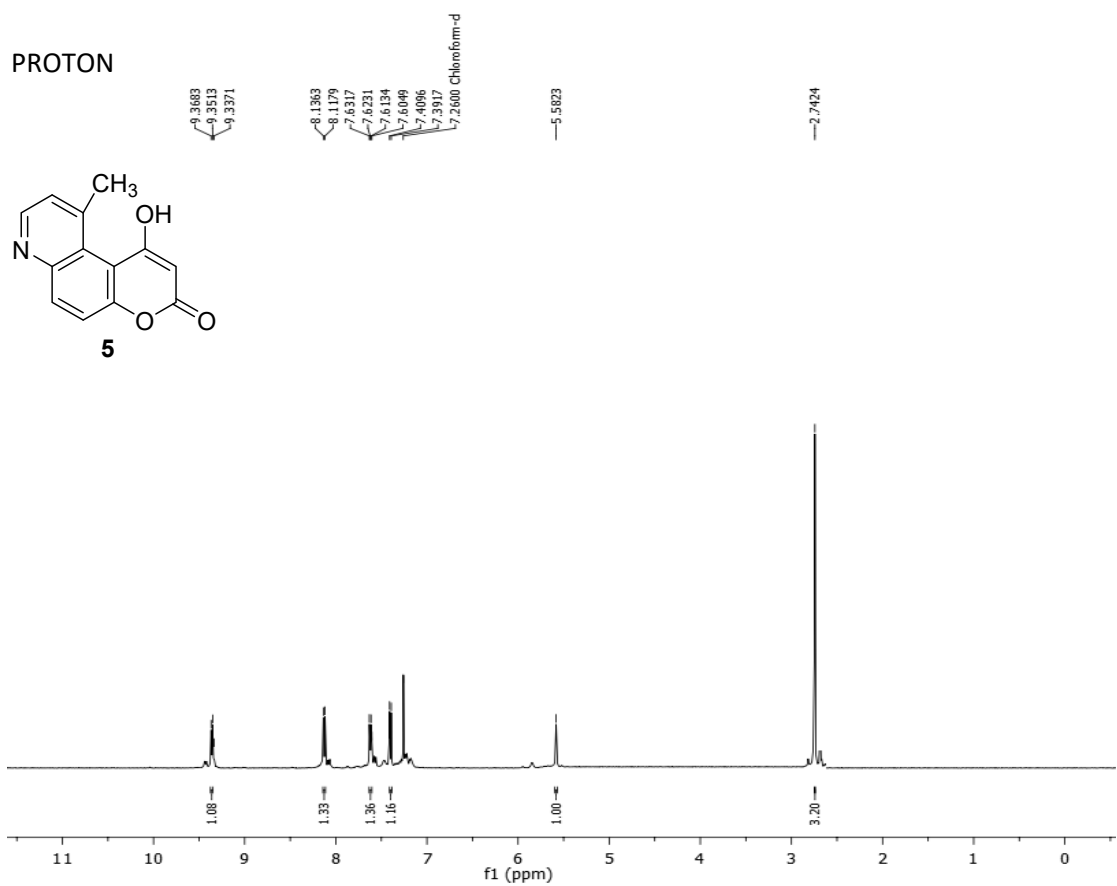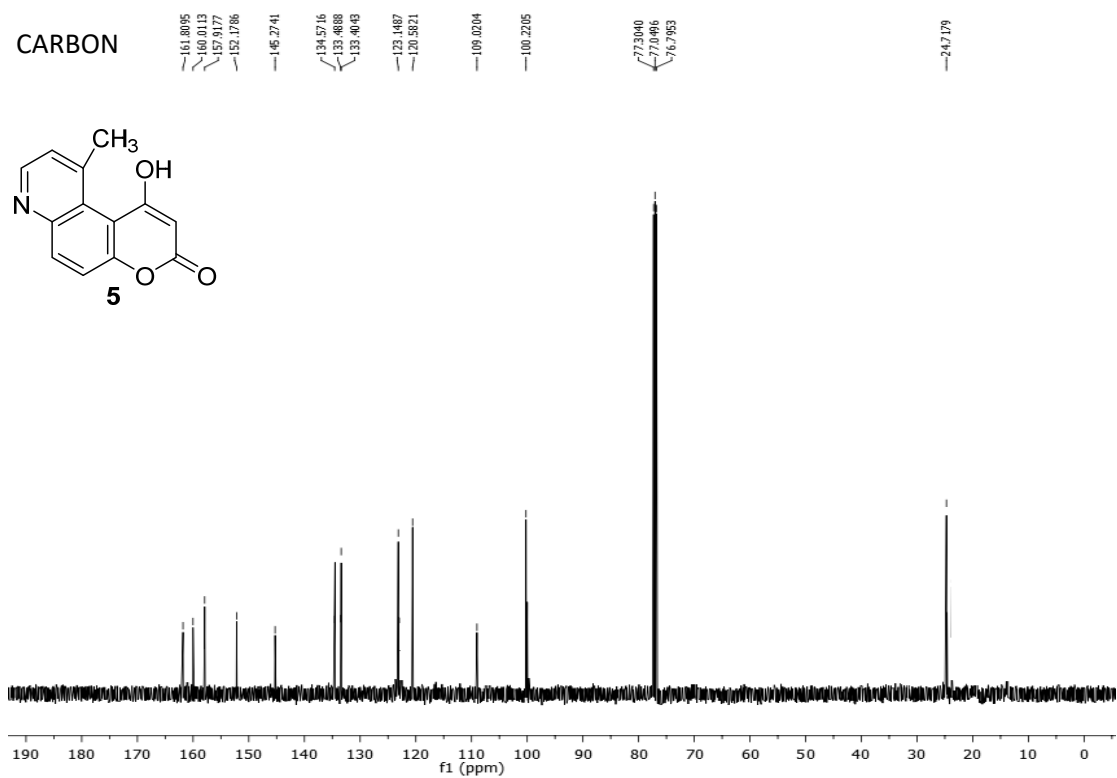

# NOESY-1D

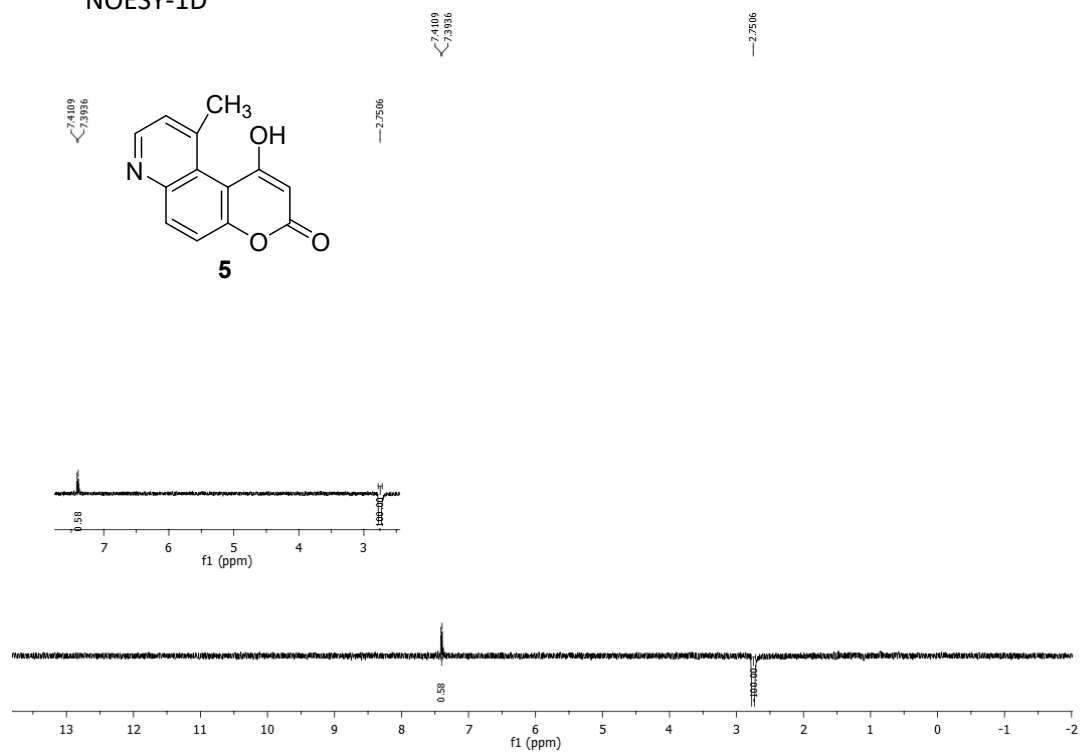

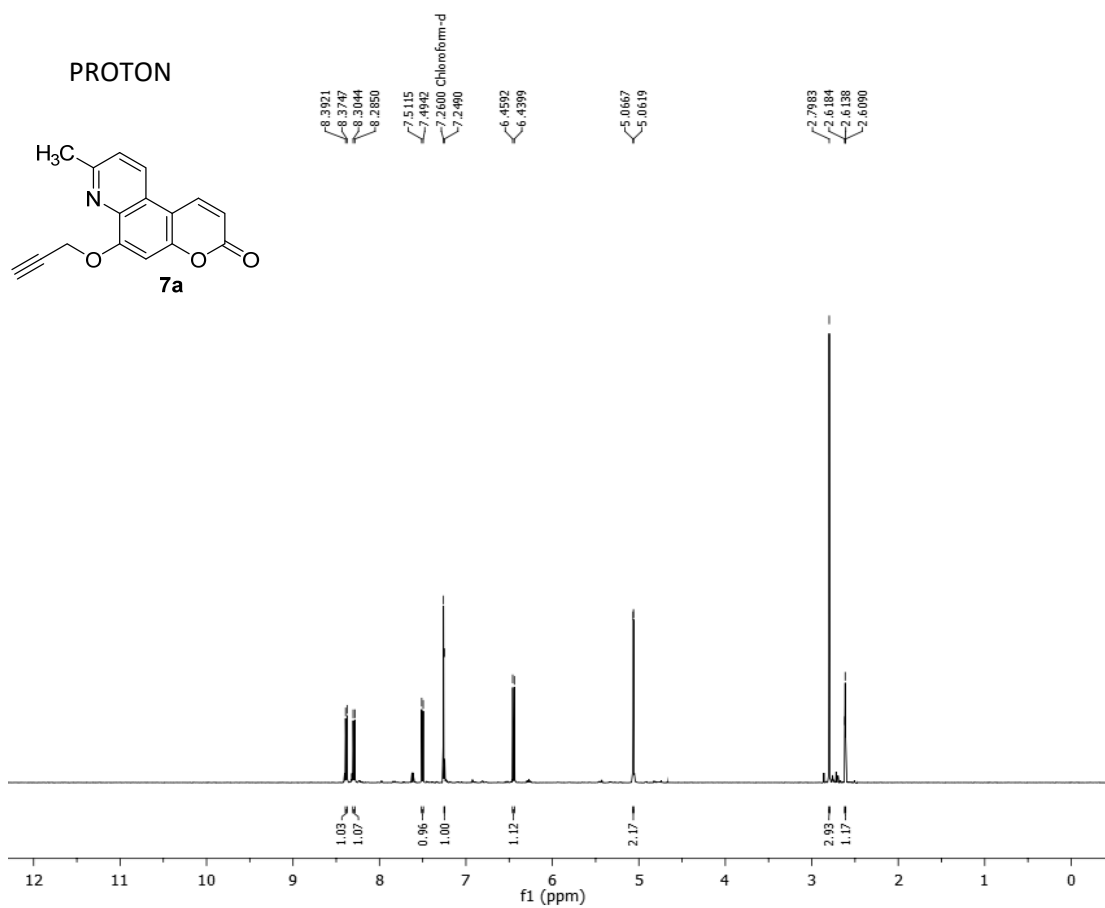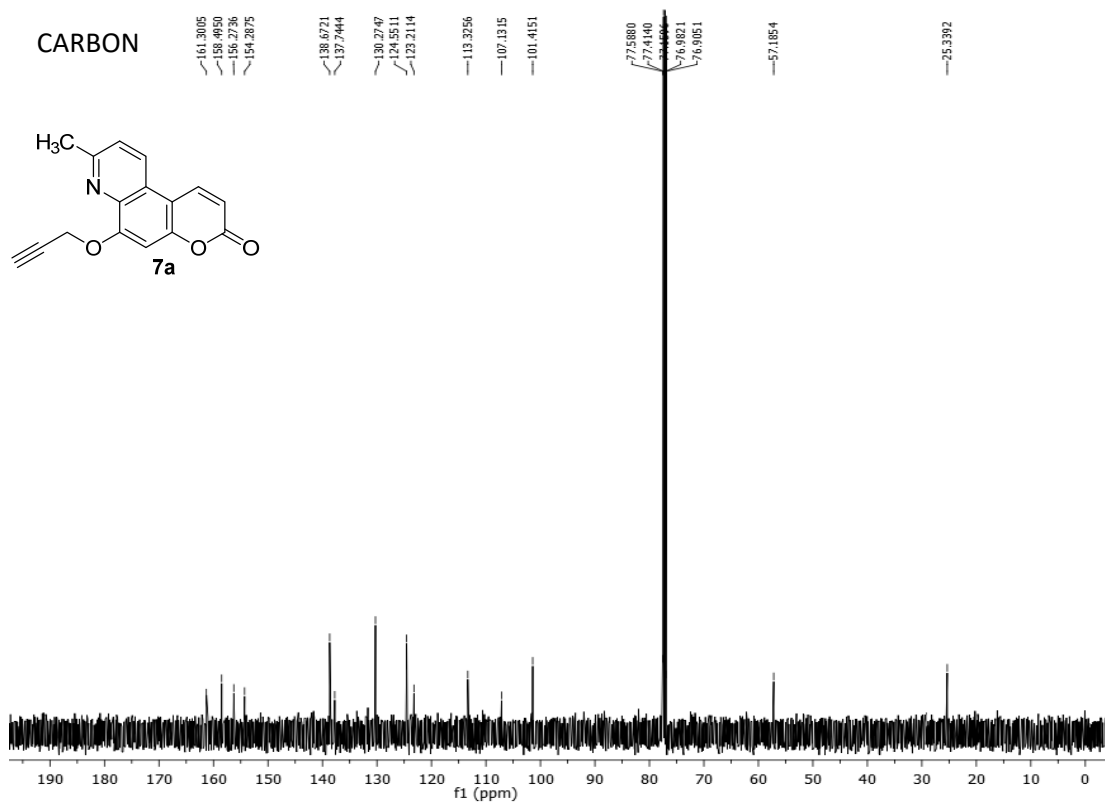

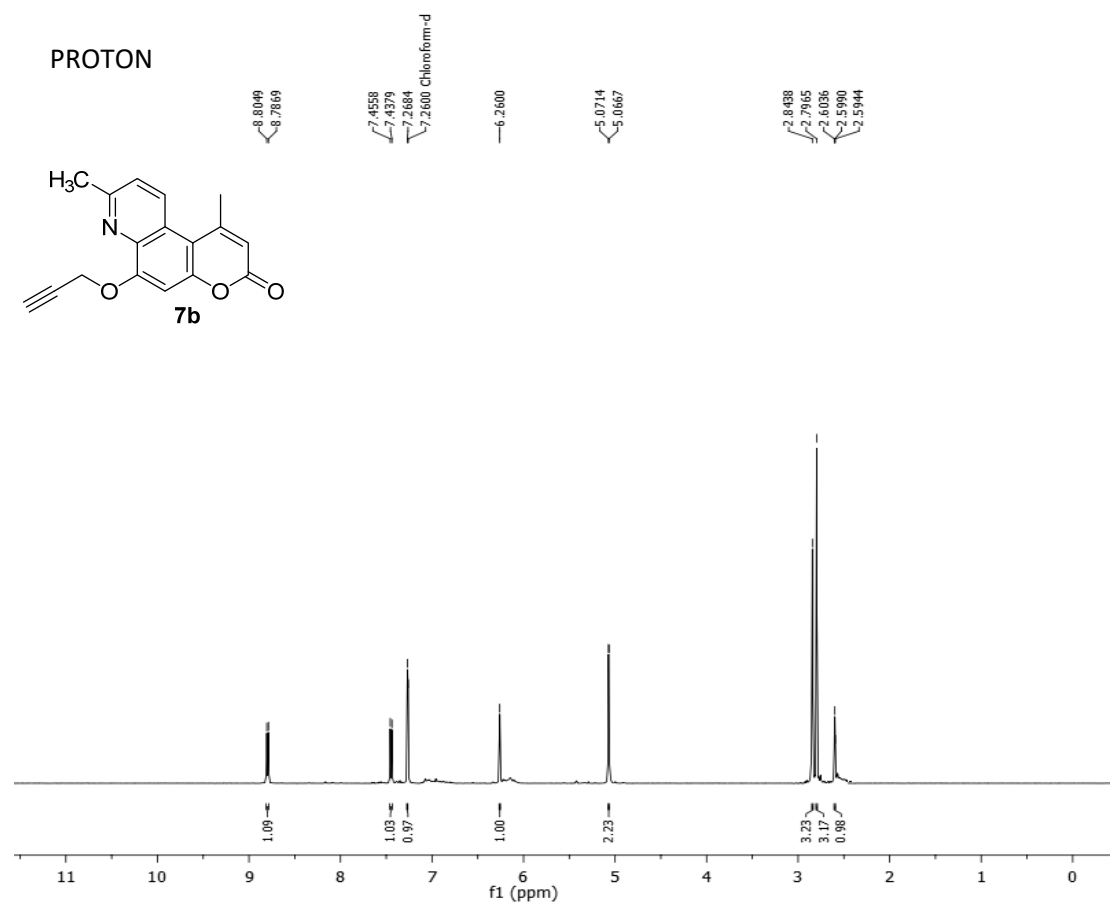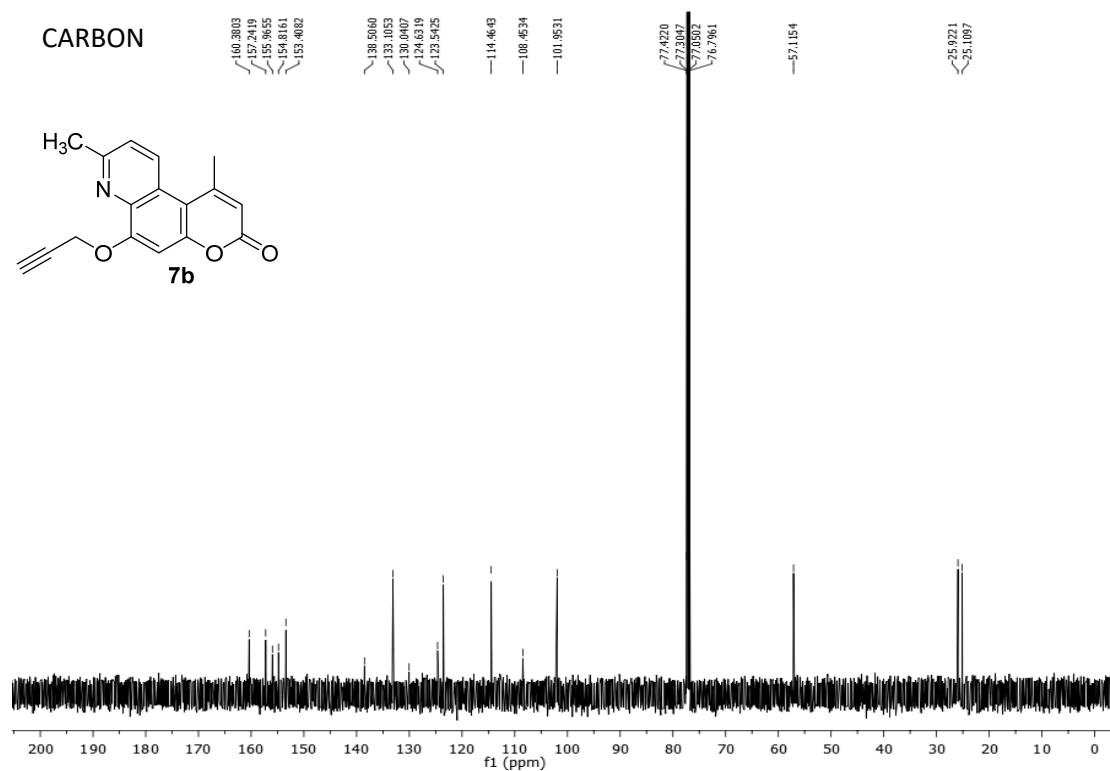

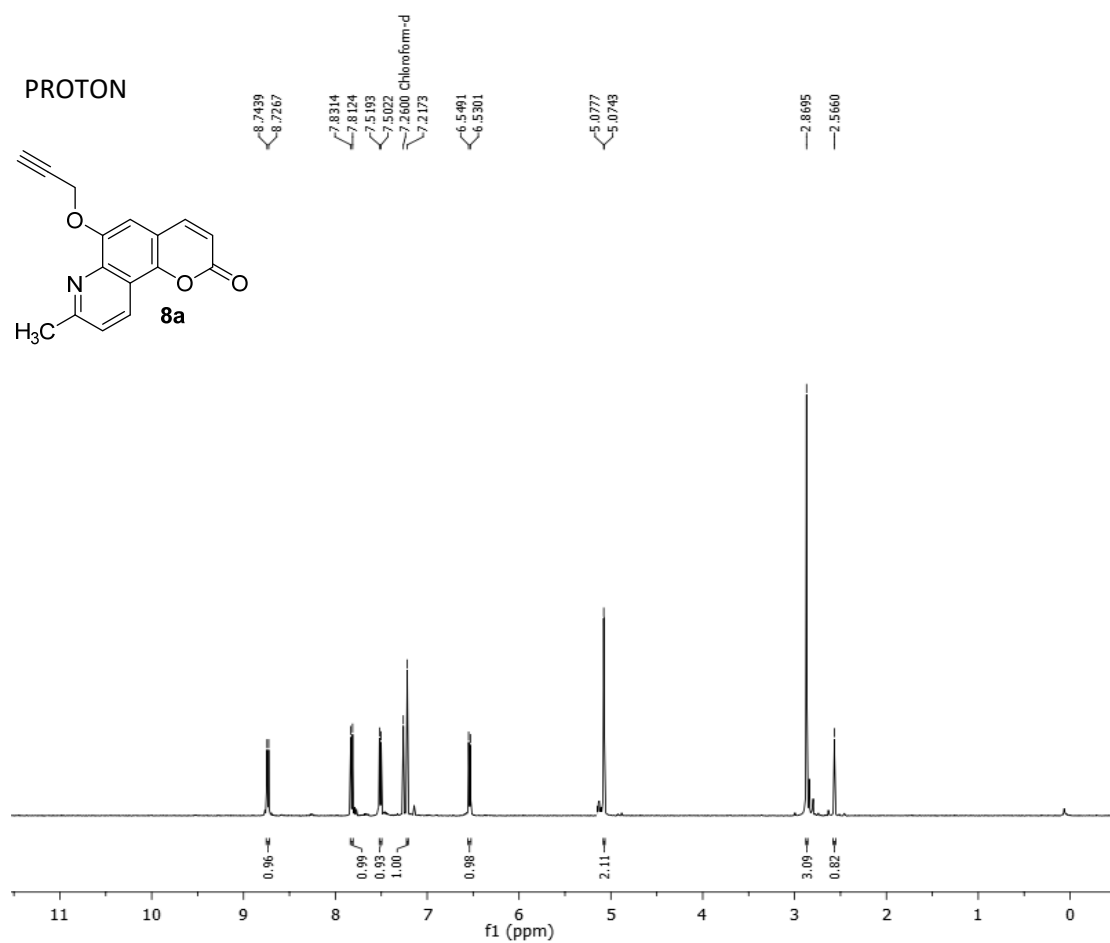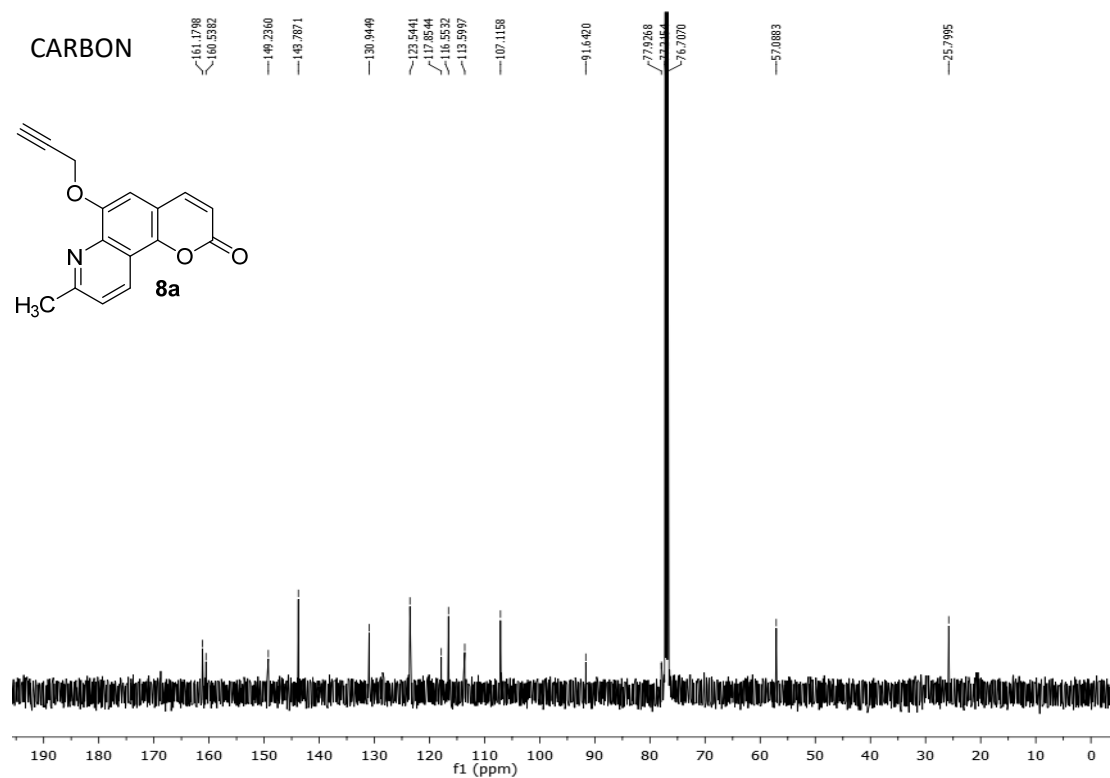

NOESY-1D

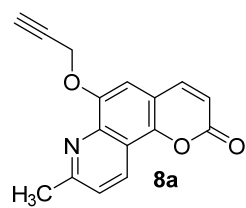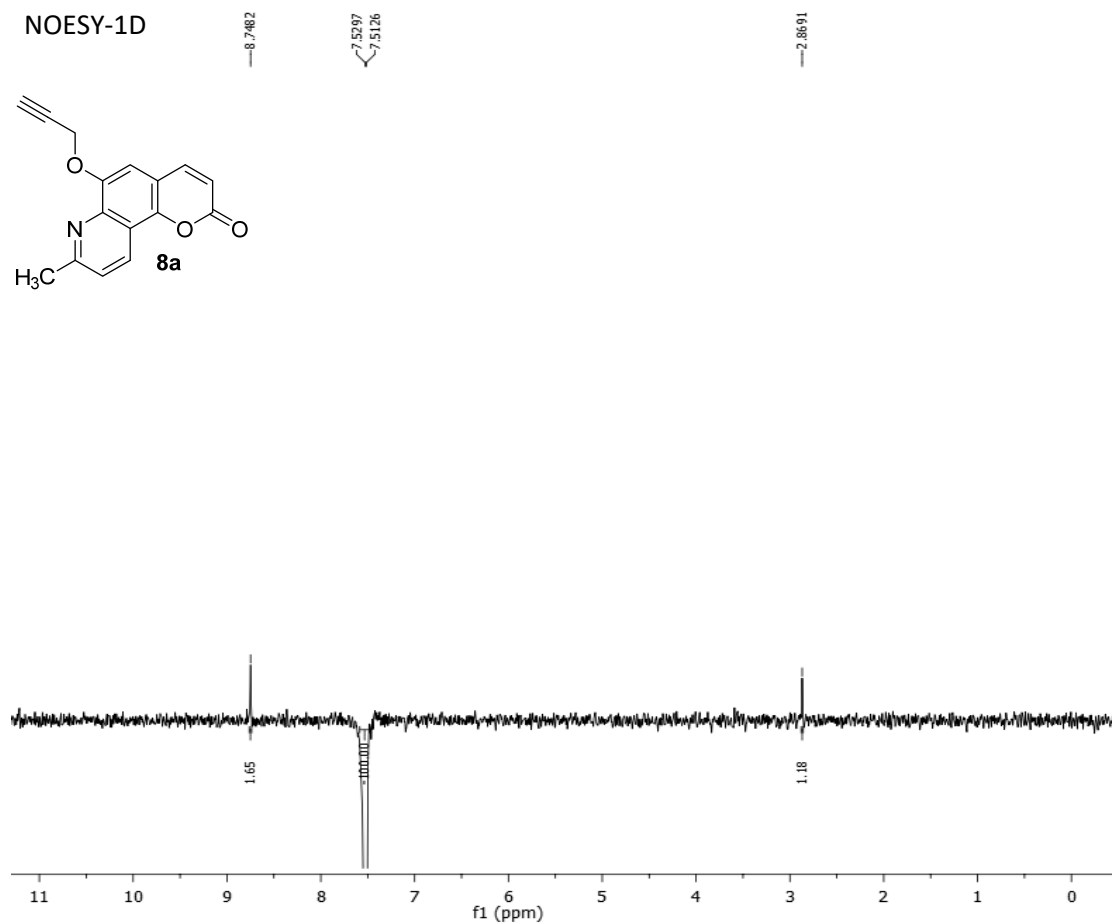



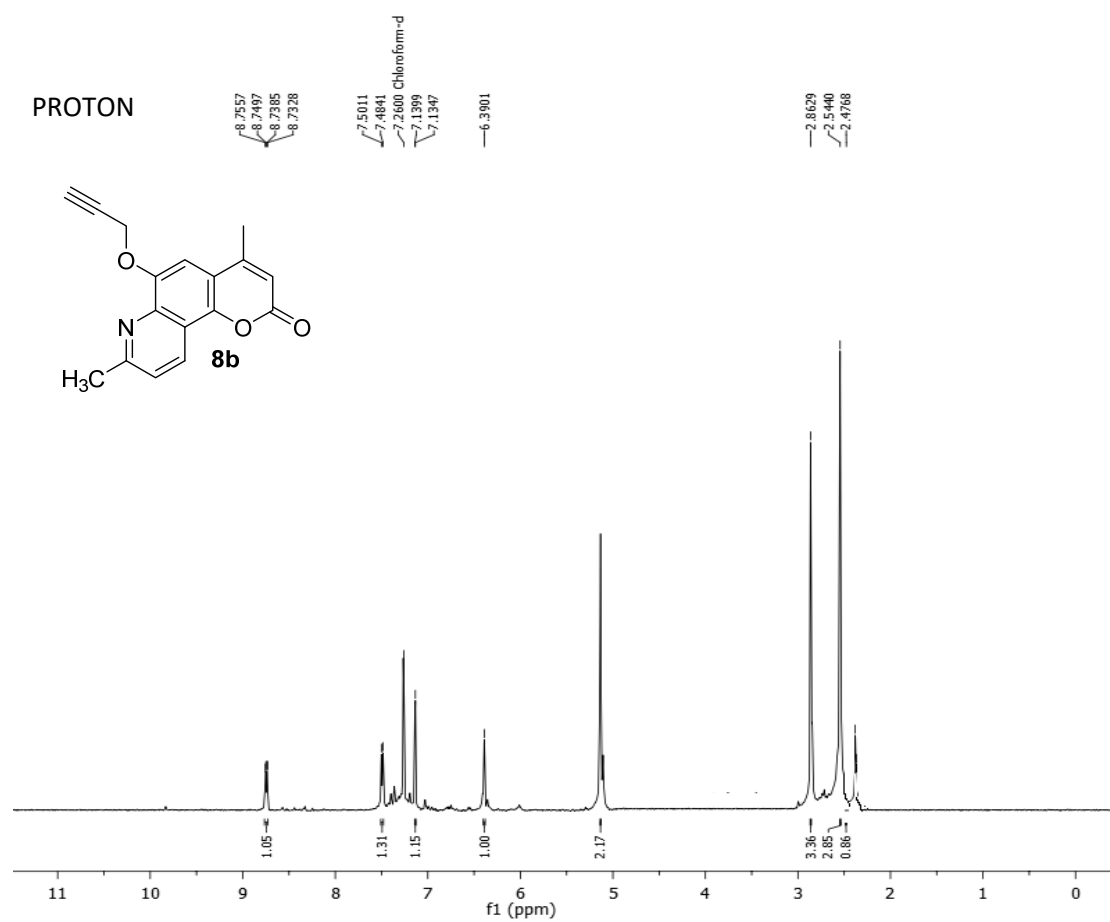

# CARBON

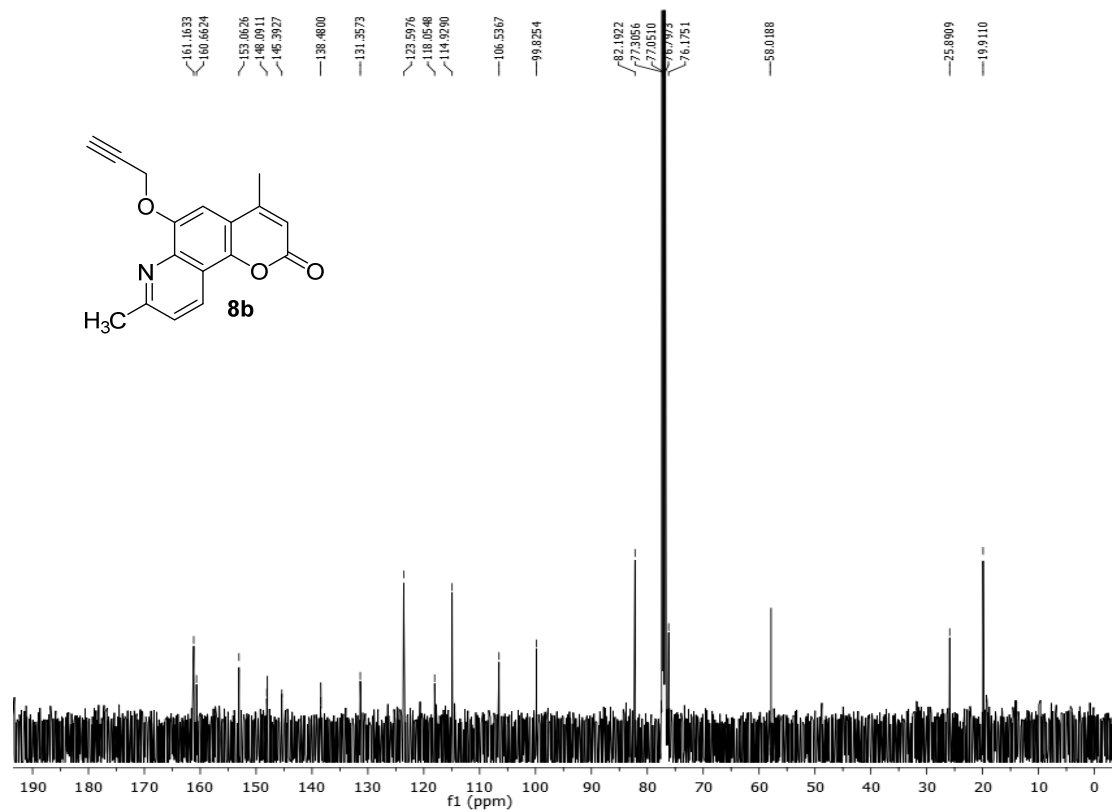

# PROTON

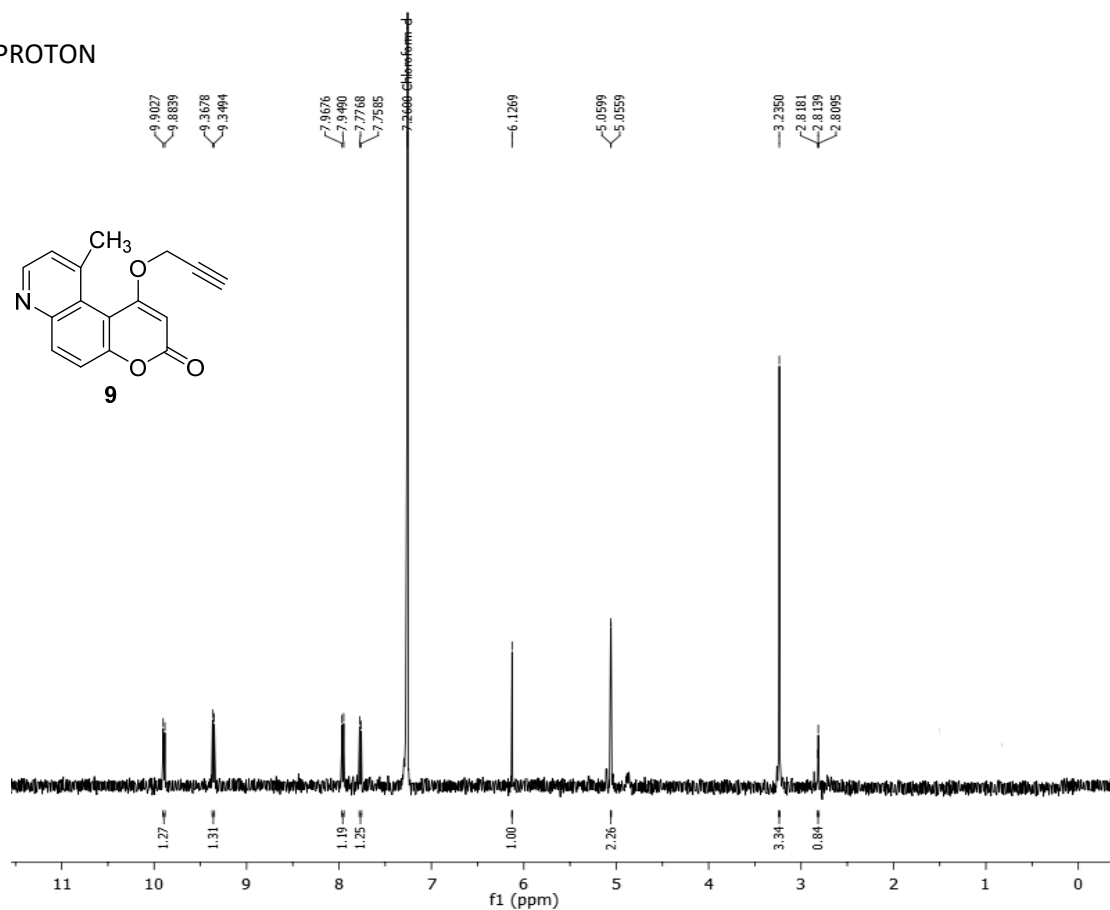

# CARBON

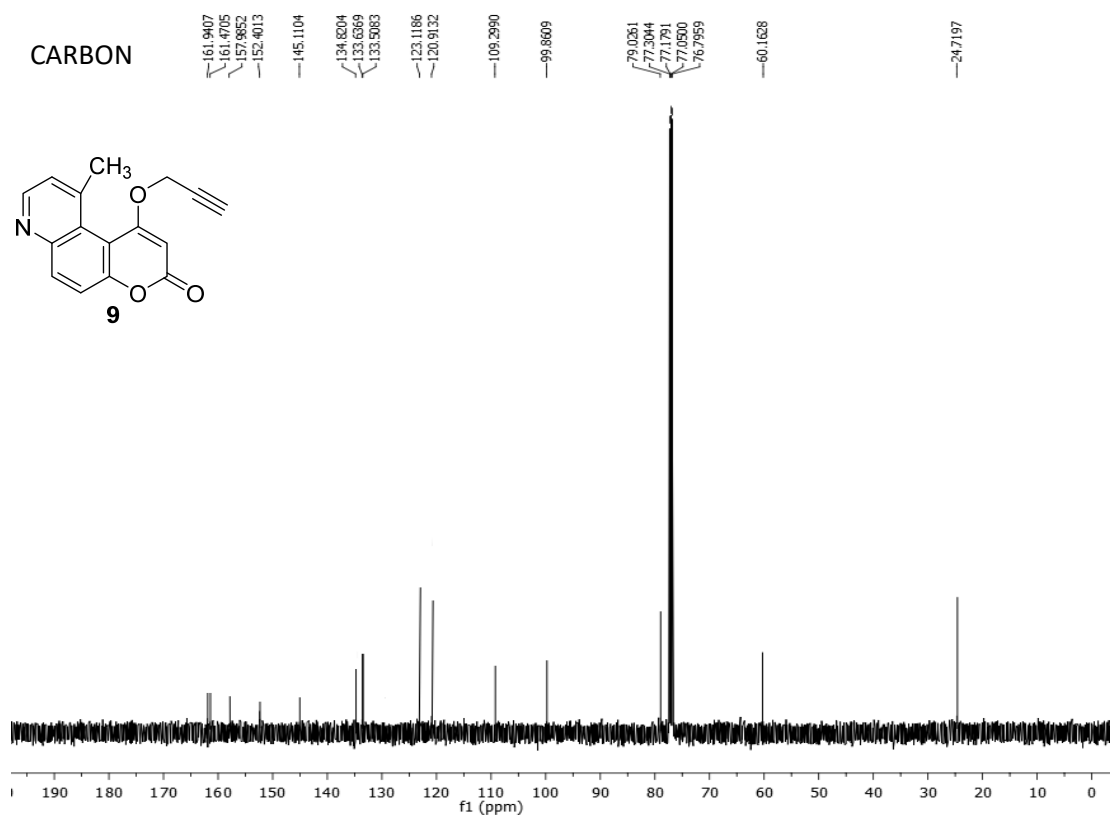

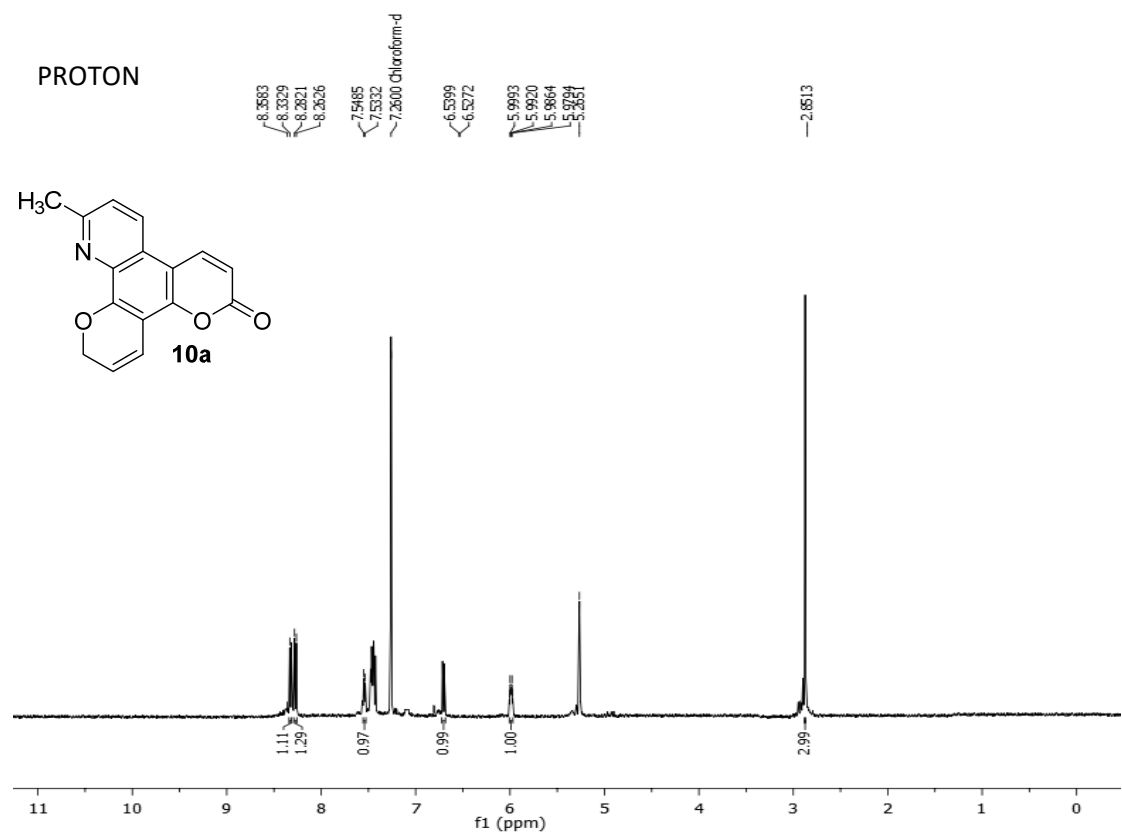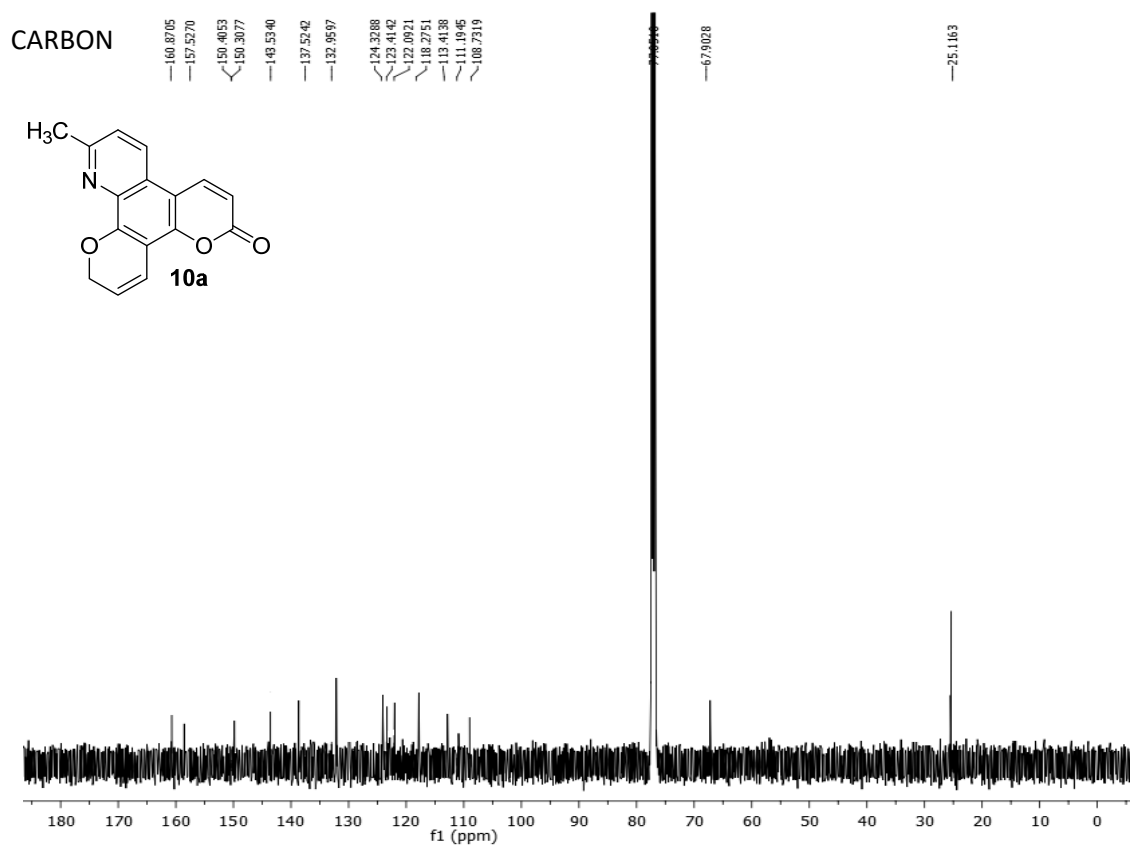

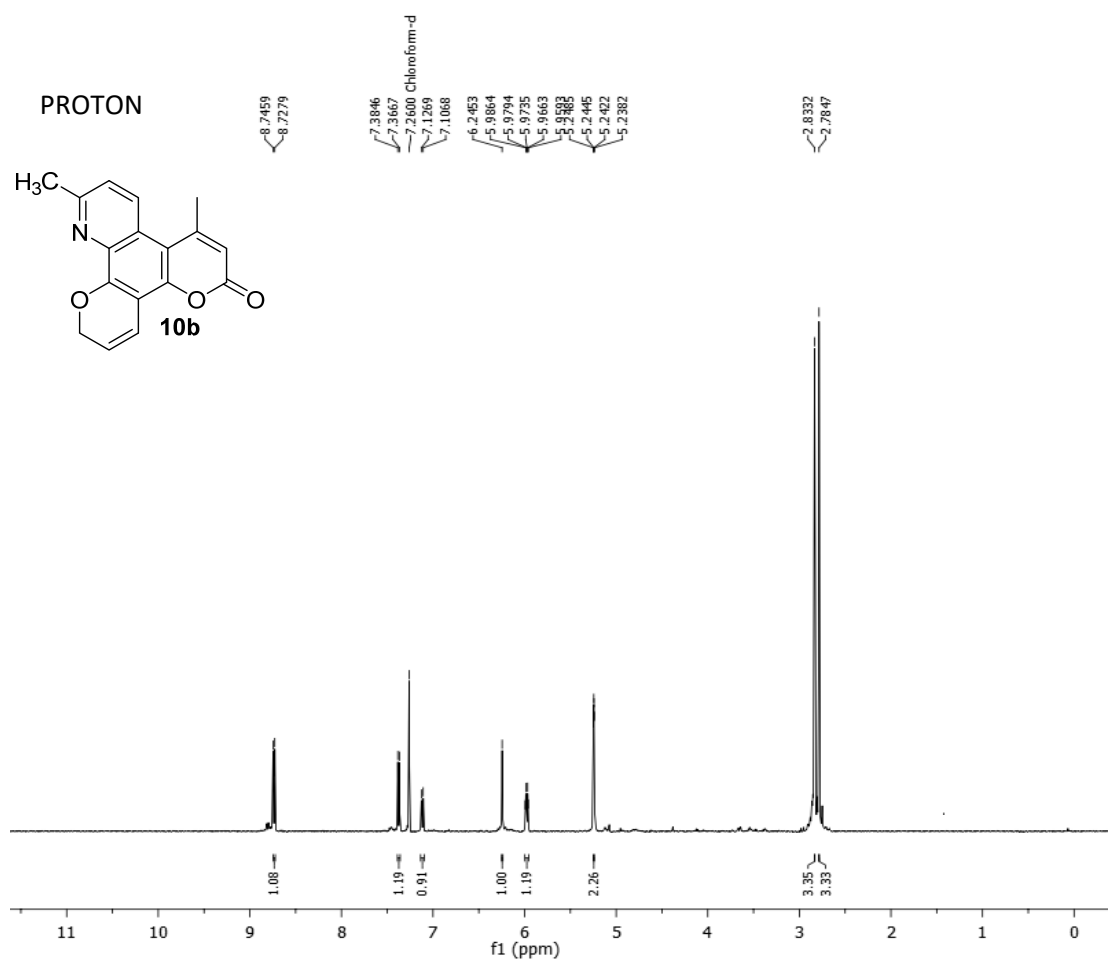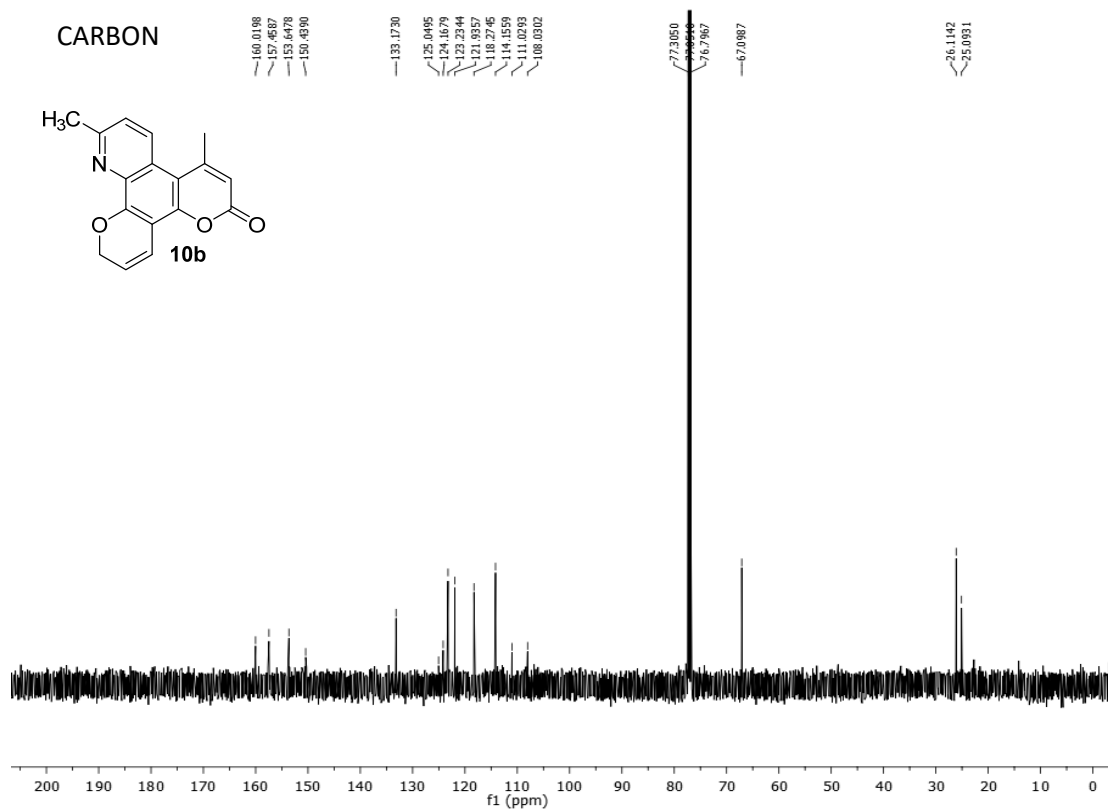

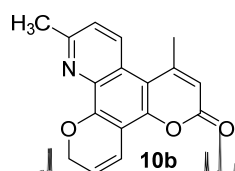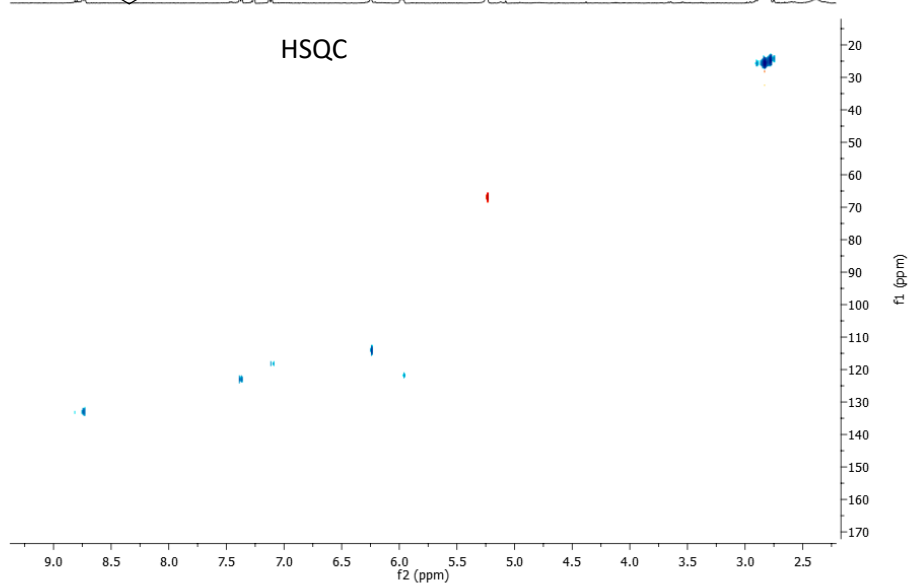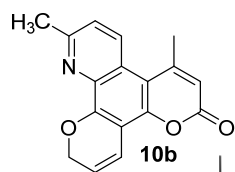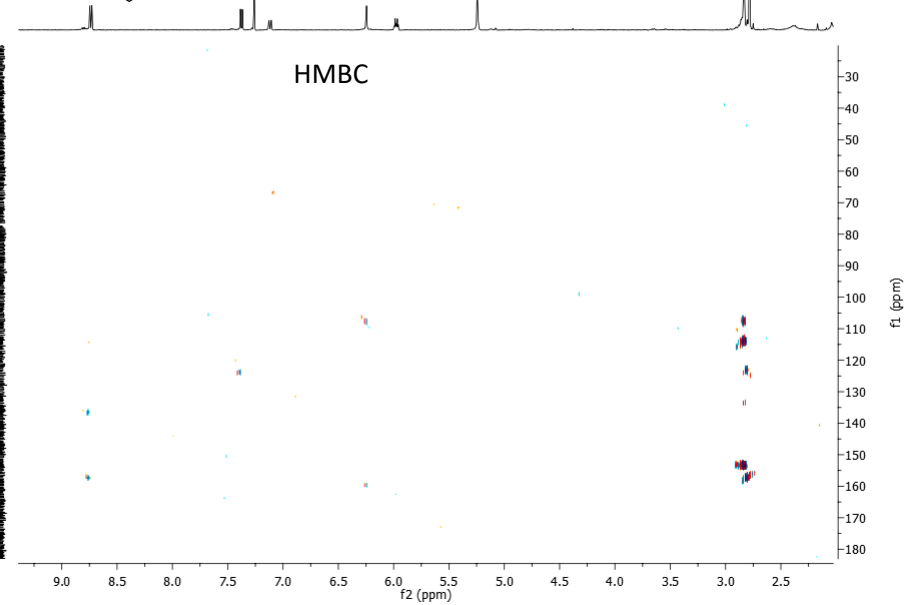

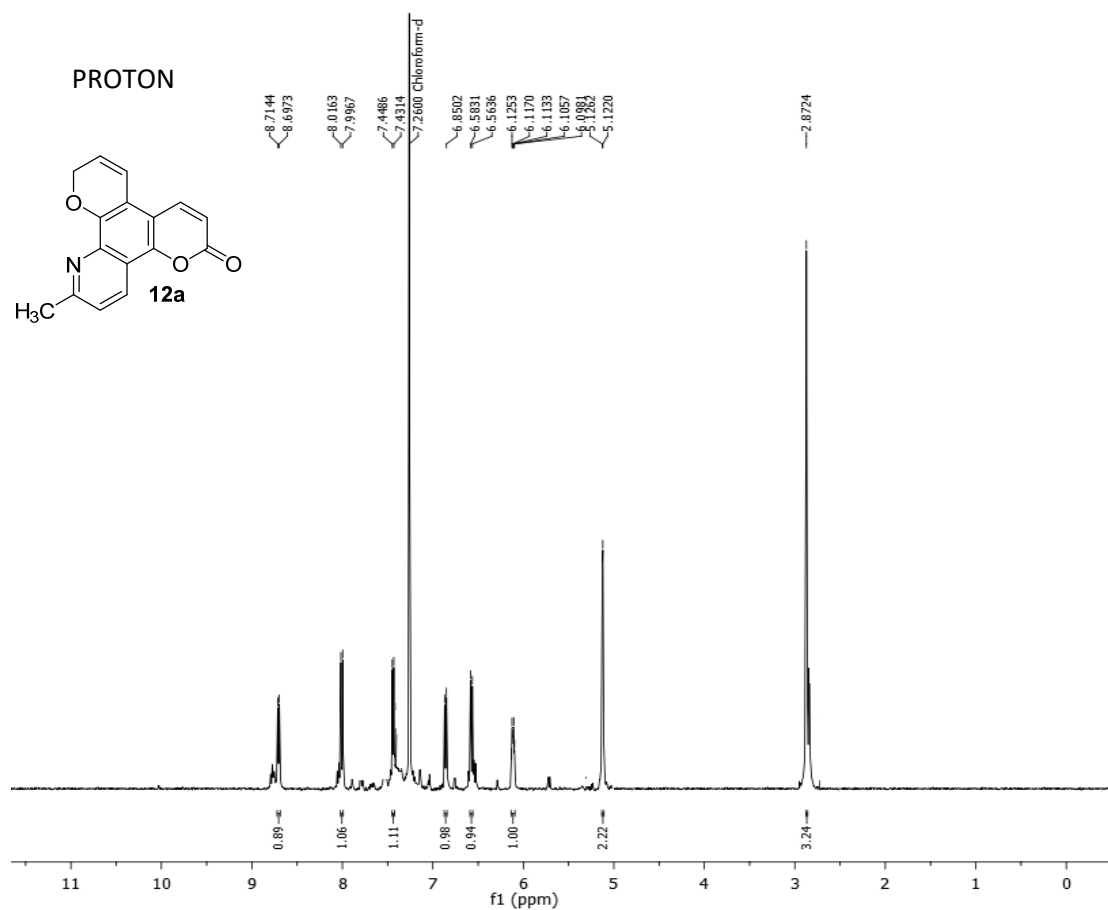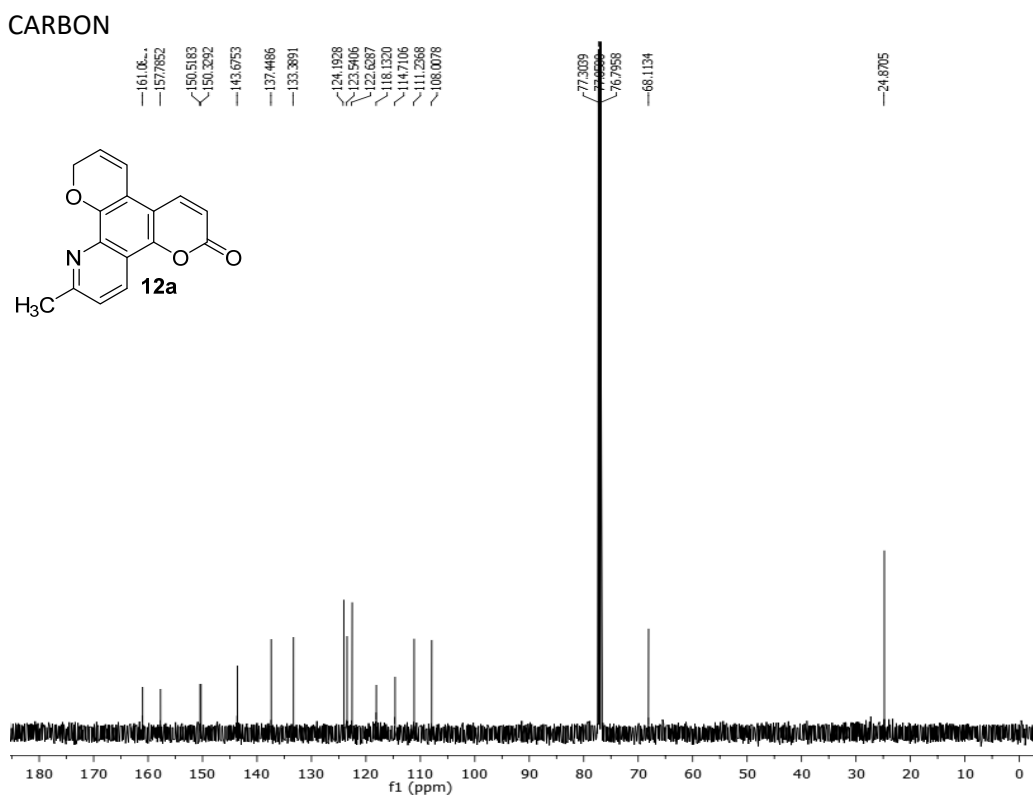

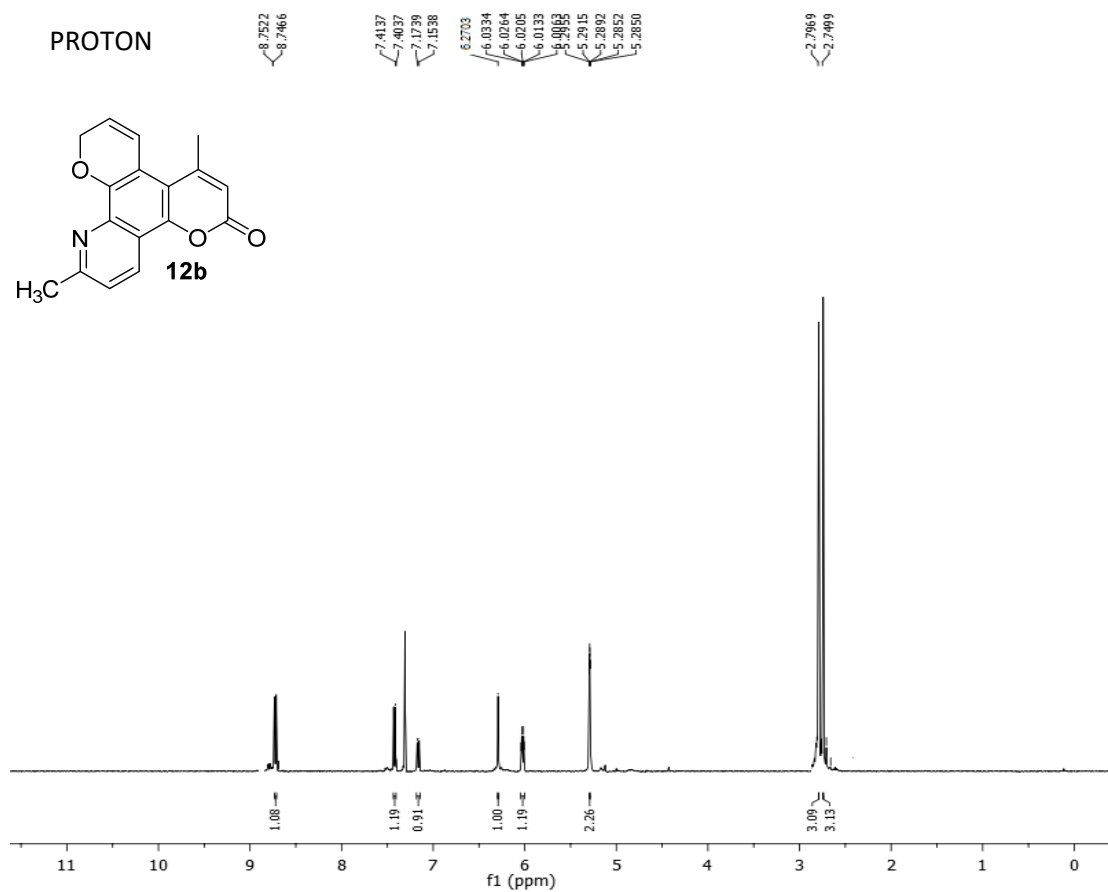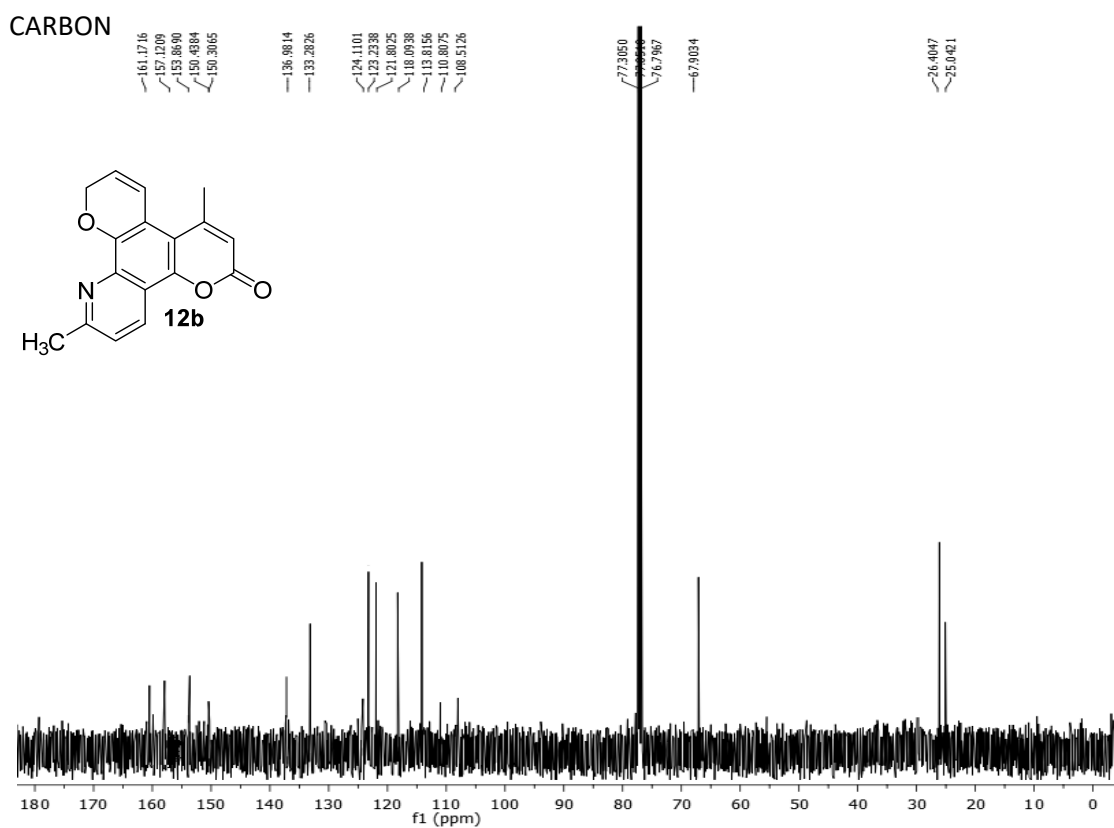



# PROTON

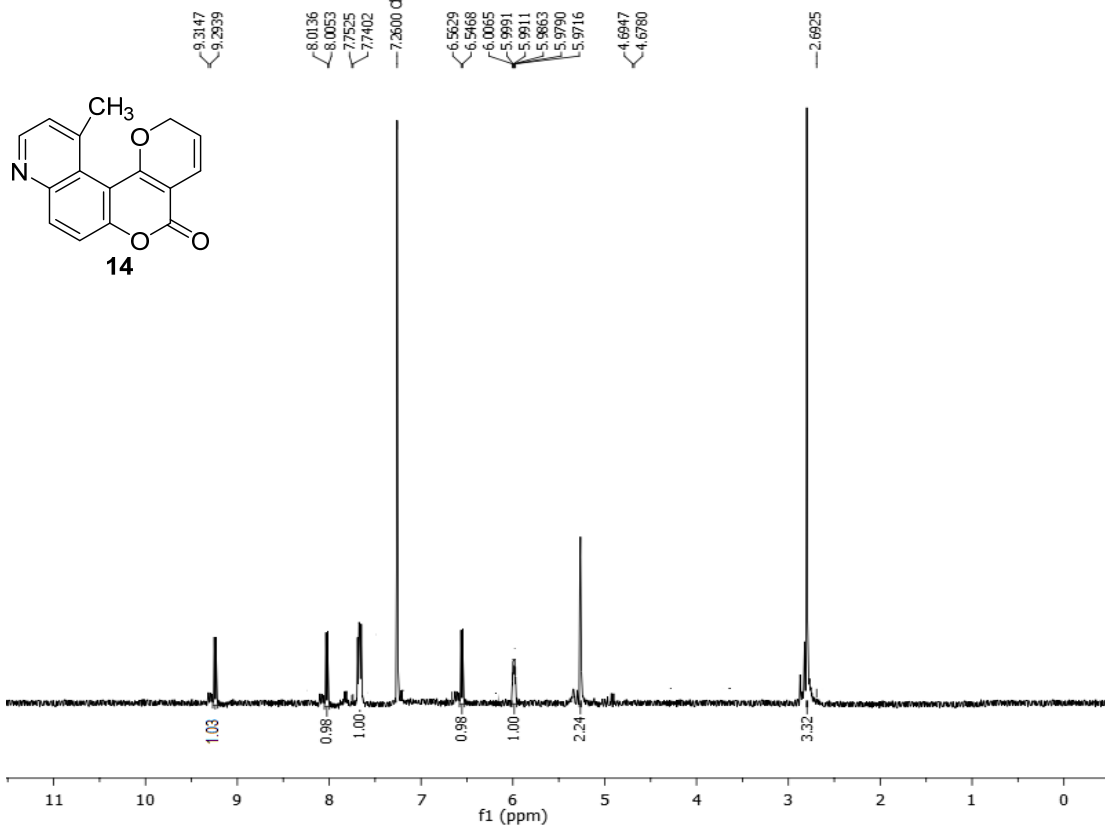

# CARBON

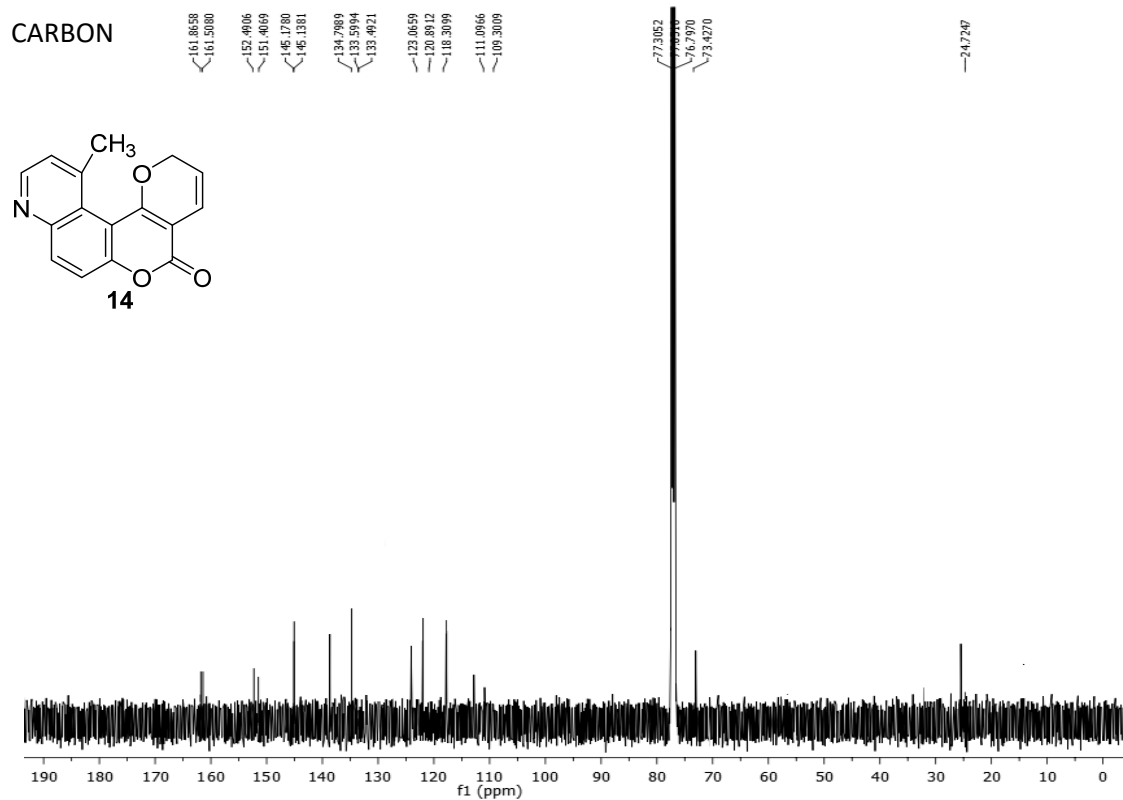

**PROTON**

**11a**

Cc1cc2c(c1)c3cc(C)c(oc3n2)c4cc(=O)oc5ccccc45

Chemical structure of compound 11a is shown. The structure is a complex polycyclic molecule featuring a benzimidazole core fused to a benzene ring, which is further fused to a pyridine ring. A methyl group (H<sub>3</sub>C) is attached to the pyridine ring. The structure is labeled 11a.

<sup>1</sup>H NMR spectrum (CDCl<sub>3</sub>-d) of compound 11a. The x-axis represents the chemical shift in ppm (f1 (ppm)), ranging from 0 to 11. The spectrum shows several peaks corresponding to the protons in the molecule. The peaks are labeled with their chemical shifts (ppm) and integration values.

Peak list (ppm):

- 8.4734
- 8.4563
- 8.4258
- 8.4064
- 7.4750
- 7.4572
- 7.2600 (Chloroform-d)
- 6.9050
- 6.5548
- 6.5353
- 2.8630
- 2.6688

Integration values (from left to right):

- 1.30
- 1.39
- 1.08
- 0.73
- 1.00
- 3.32
- 3.37

**CARBON**

Chemical structure of **11a** is shown. The structure is a tricyclic compound consisting of a pyridine ring fused to a benzene ring, which is further fused to a furan ring. The pyridine ring has a methyl group (H<sub>3</sub>C) attached to the nitrogen atom. The furan ring has a methyl group attached to the oxygen atom. The benzene ring has a carbonyl group (C=O) attached to the oxygen atom.

Carbon NMR peaks (ppm) are labeled above the spectrum:

- 160.7093
- 158.8804
- 157.9911
- 157.0651
- 146.2161
- 139.4057
- 134.2733
- 130.6153
- 122.2681
- 119.7968
- 119.7091
- 113.7747
- 108.3549
- 101.3538
- 77.3039
- 77.0629
- 76.9955
- 25.2388
- 14.4464

190 180 170 160 150 140 130 120 110 100 90 80 70 60 50 40 30 20 10 0

f1 (ppm)

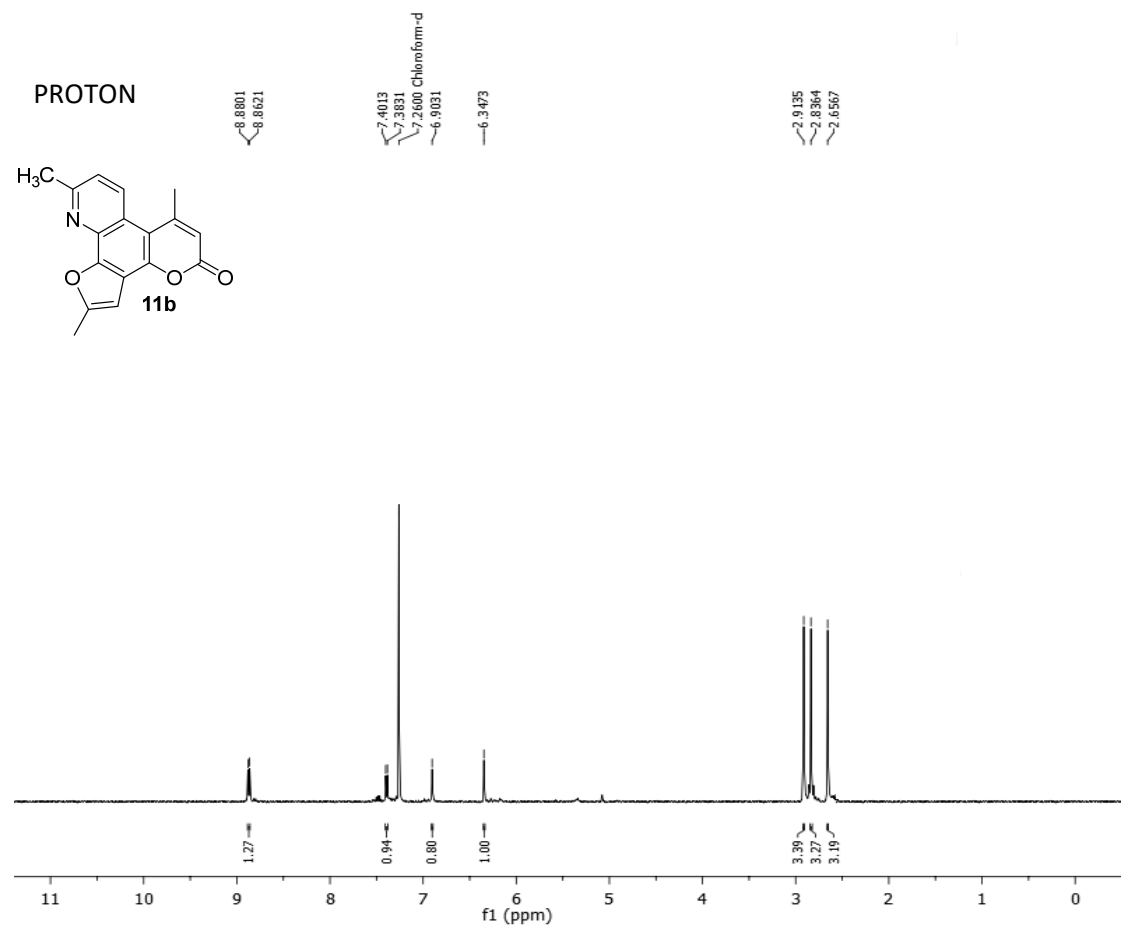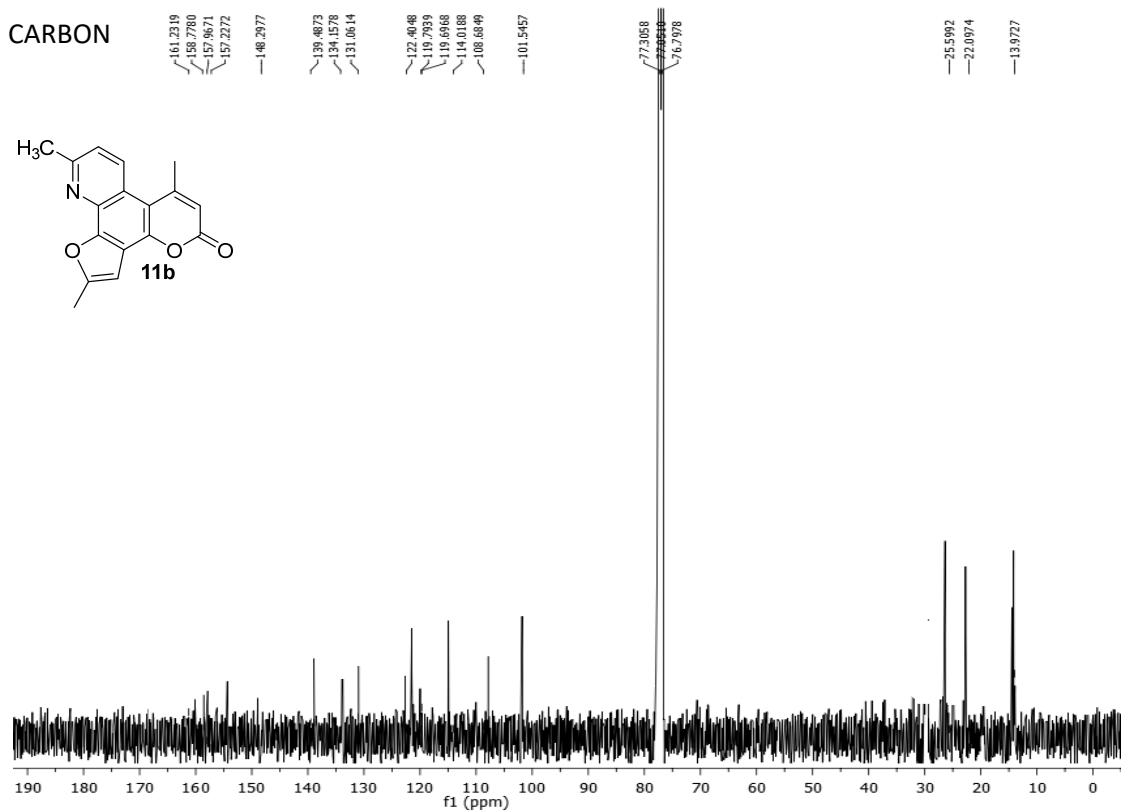

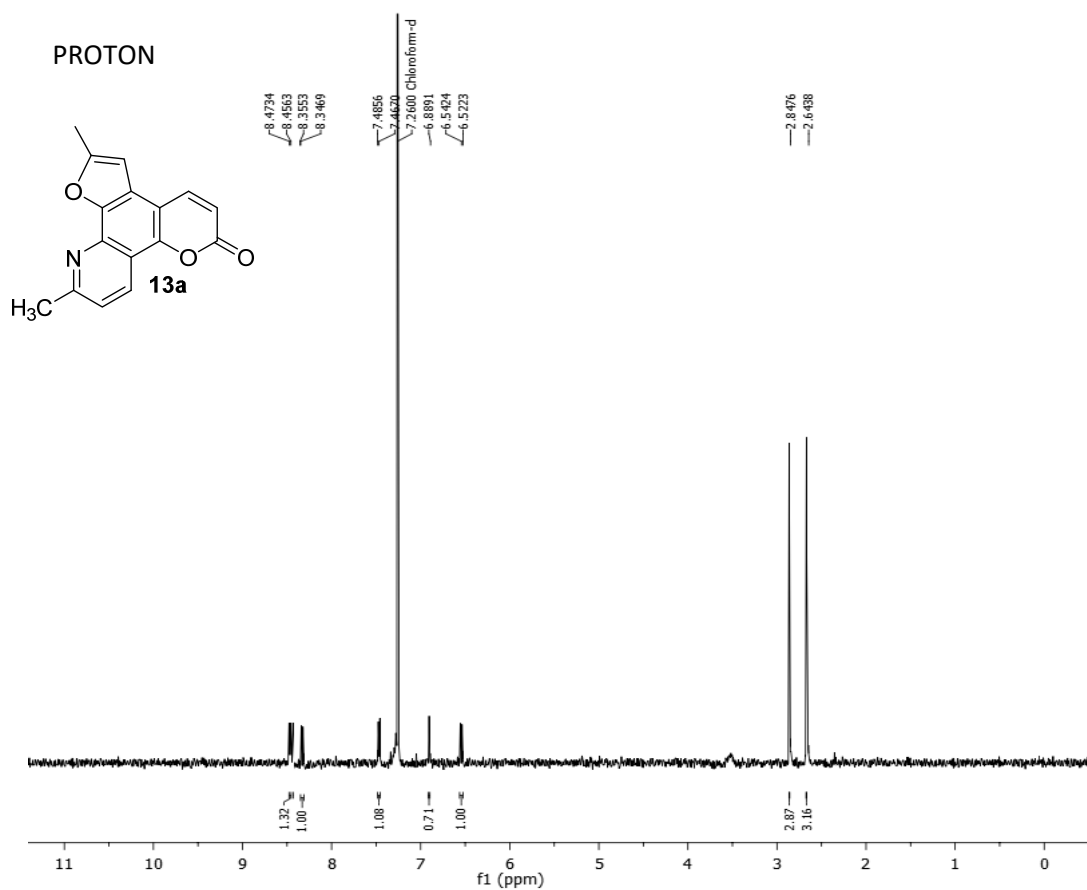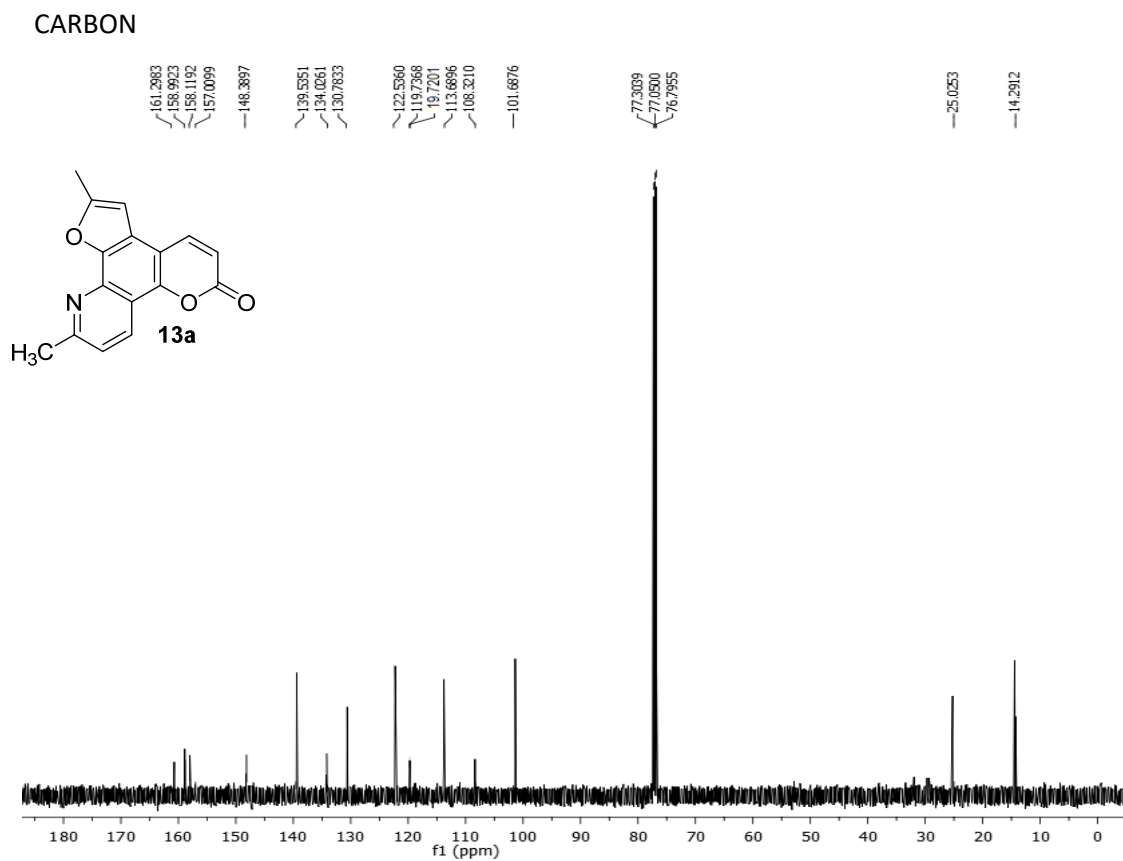

# PROTON

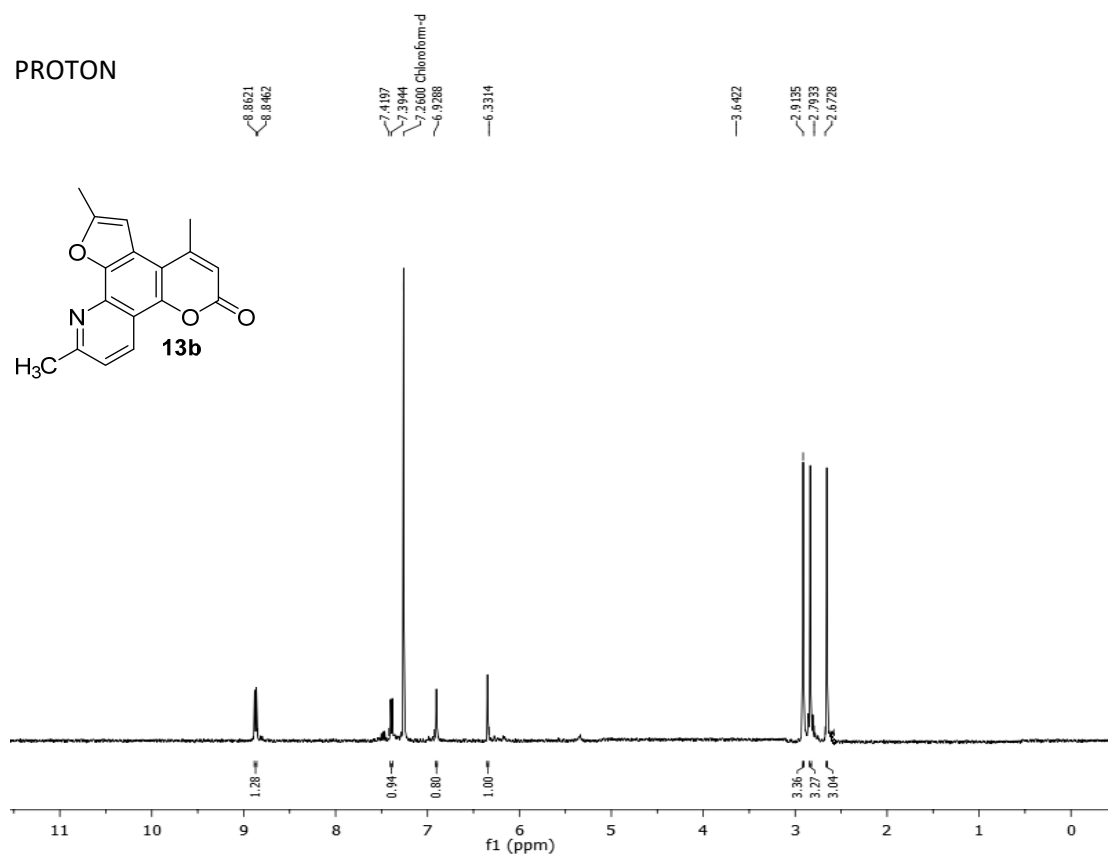

# CARBON

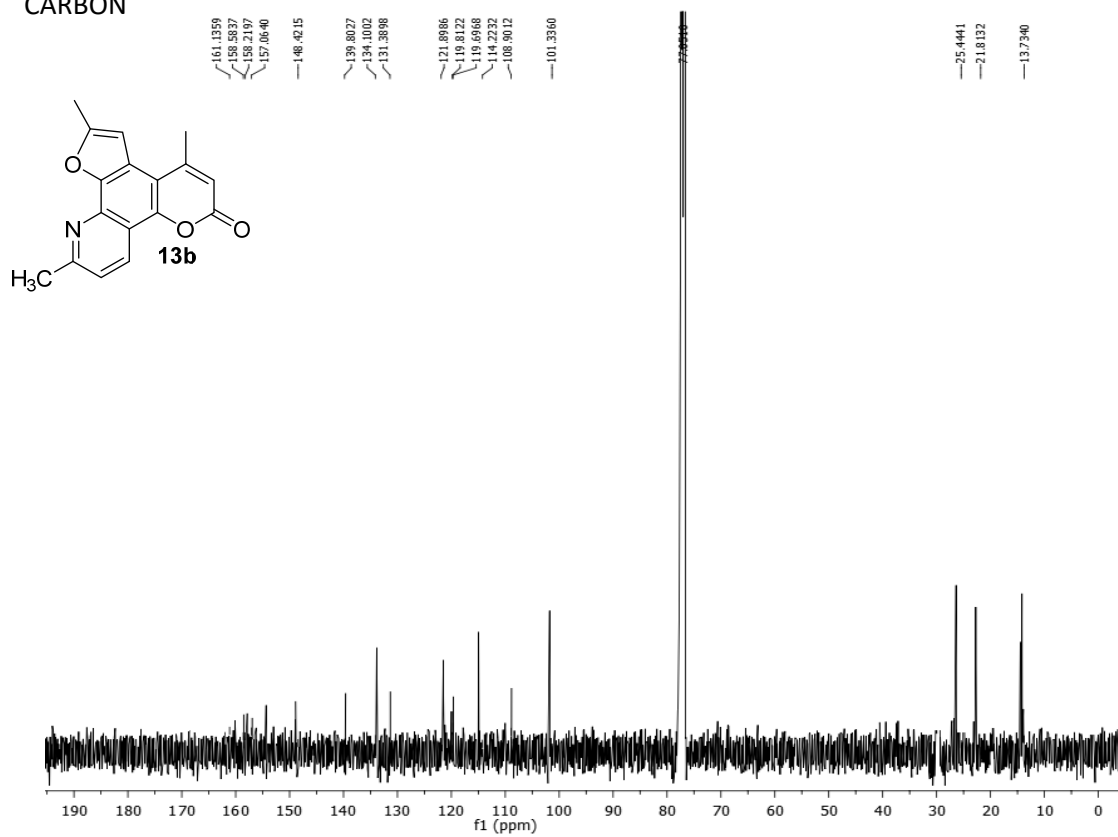

# PROTON

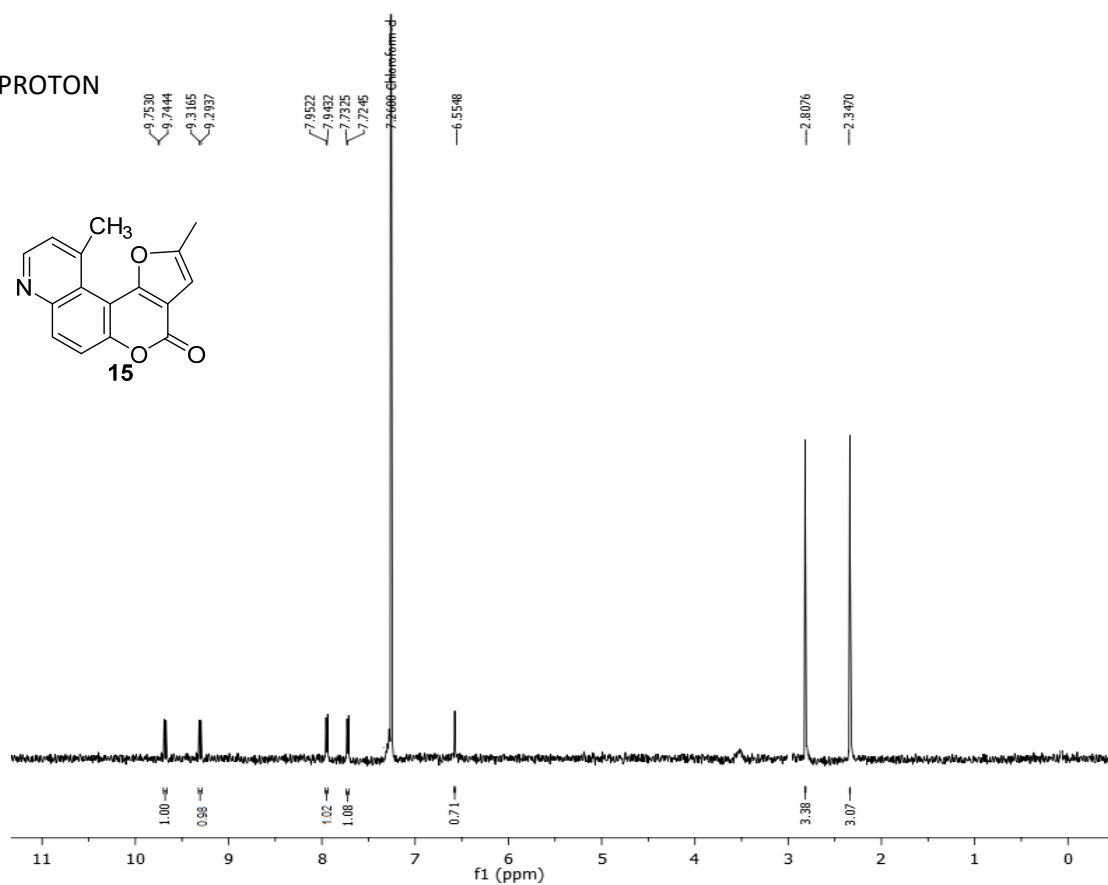

# CARBON

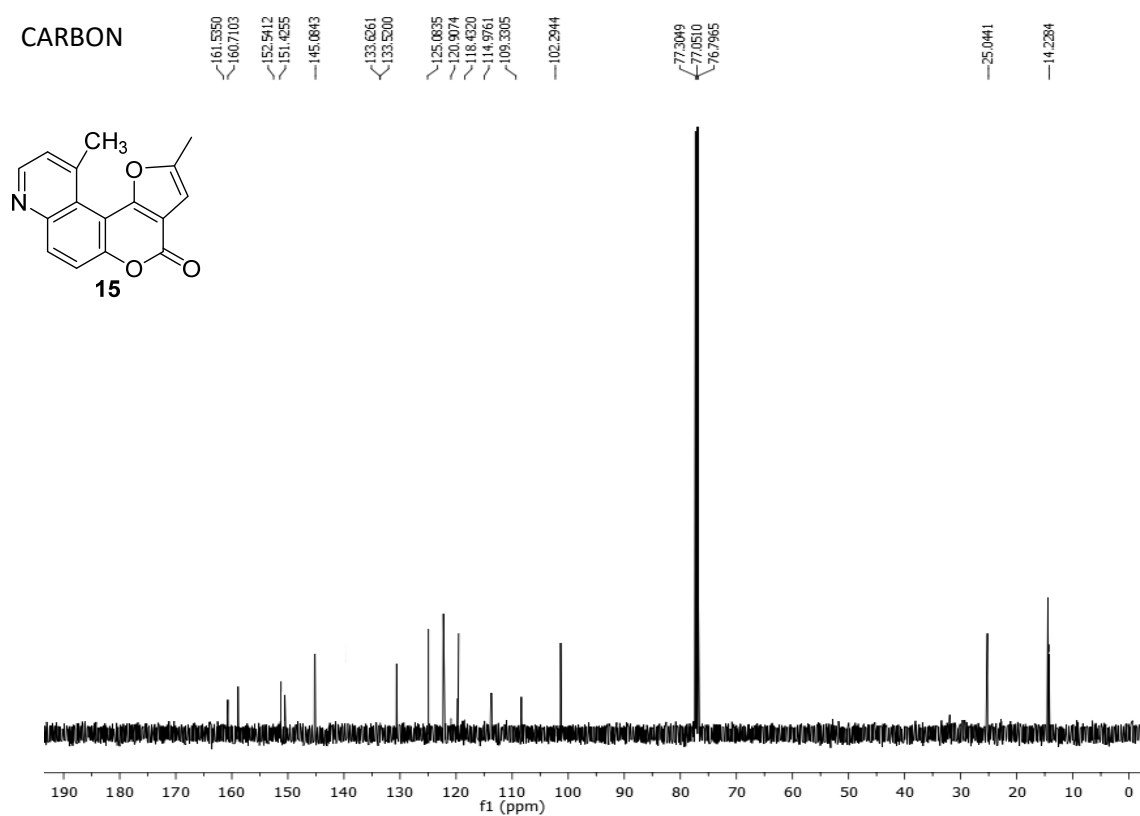

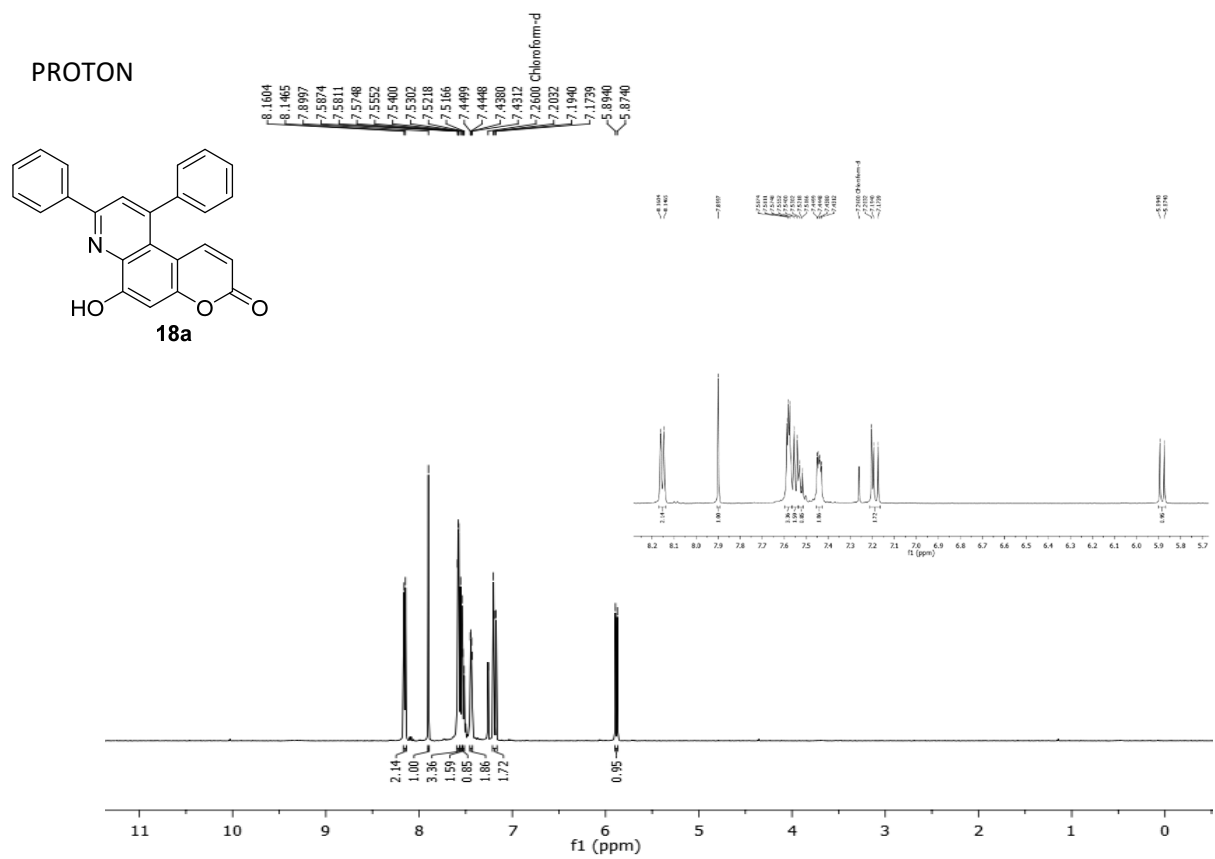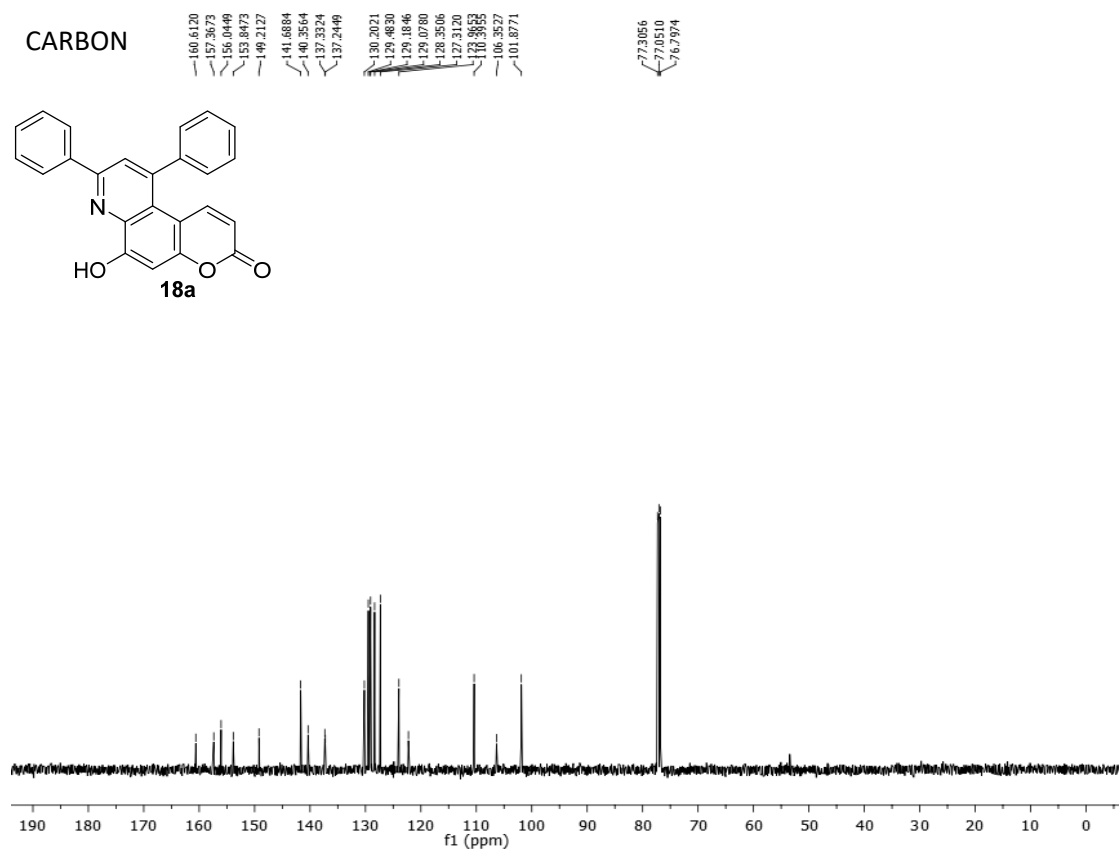

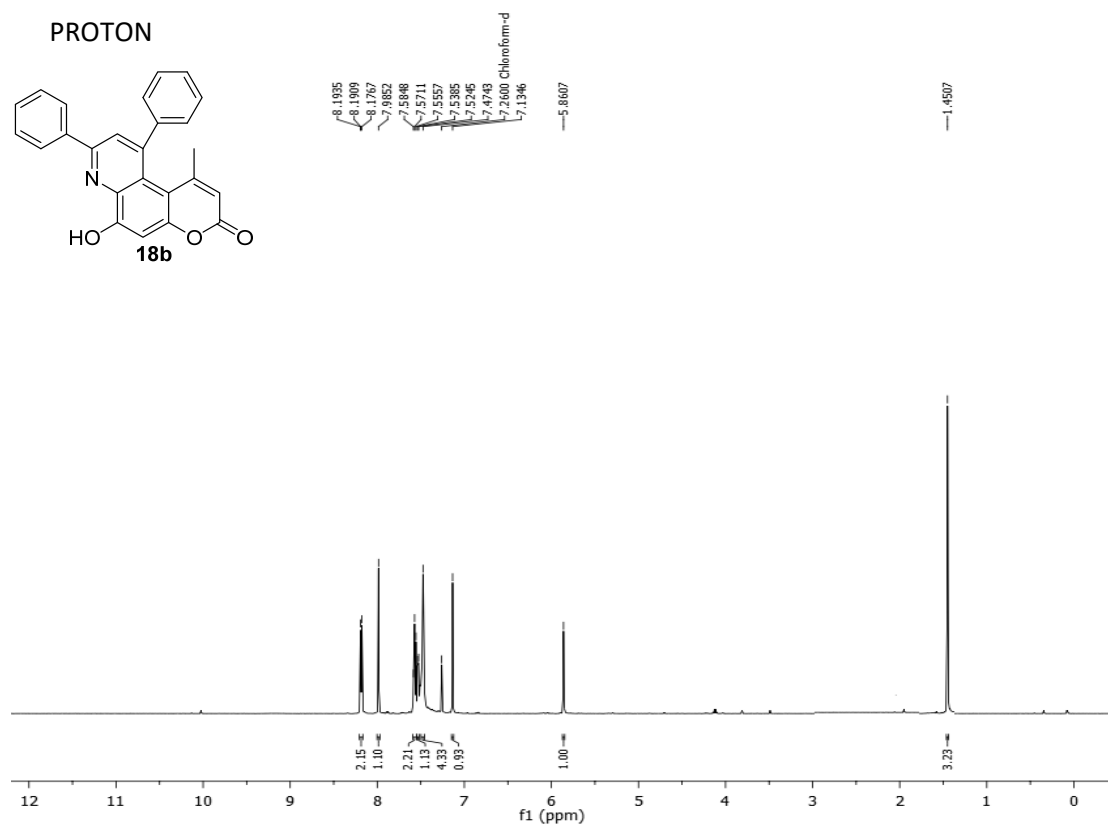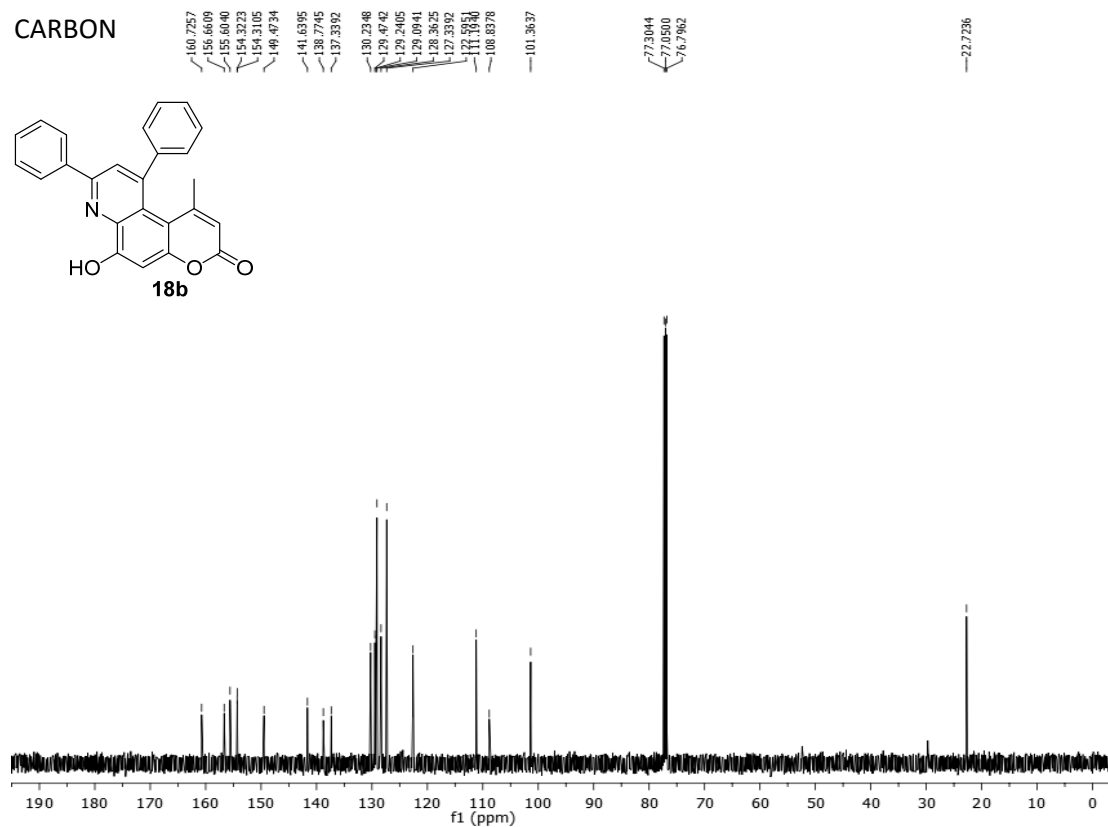



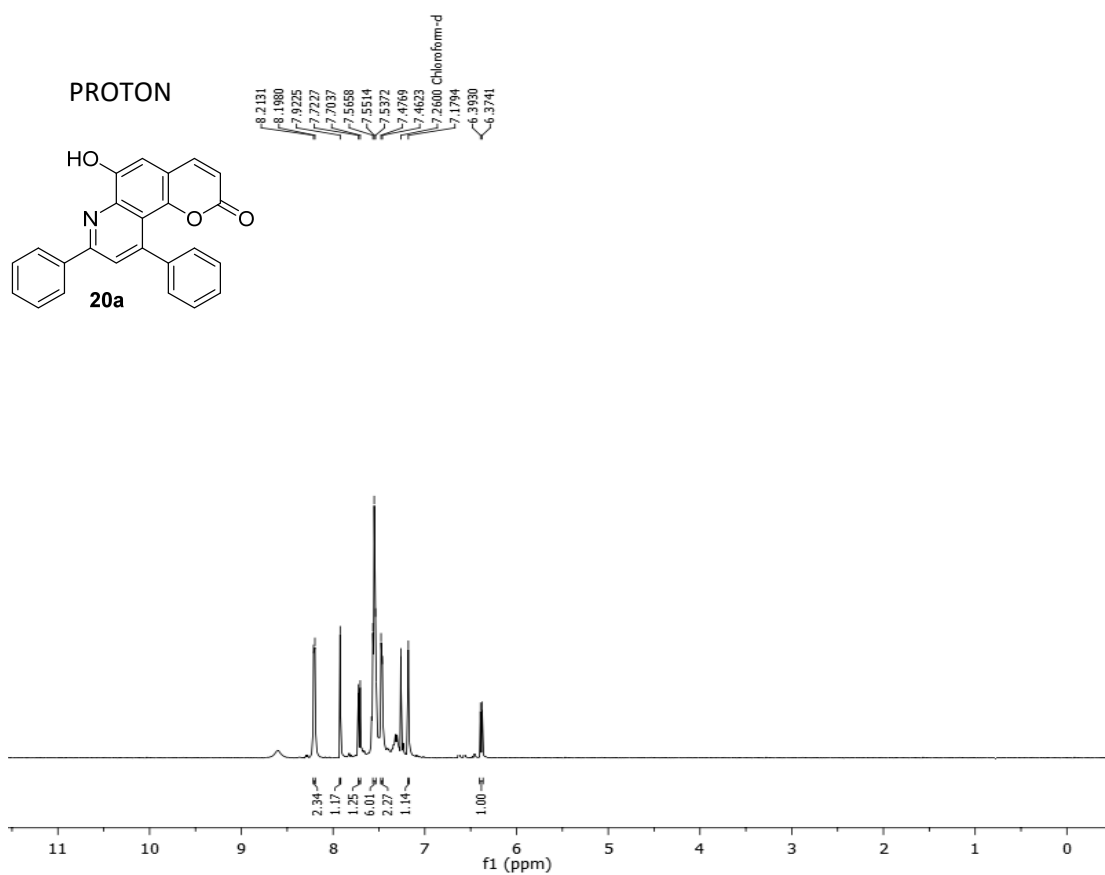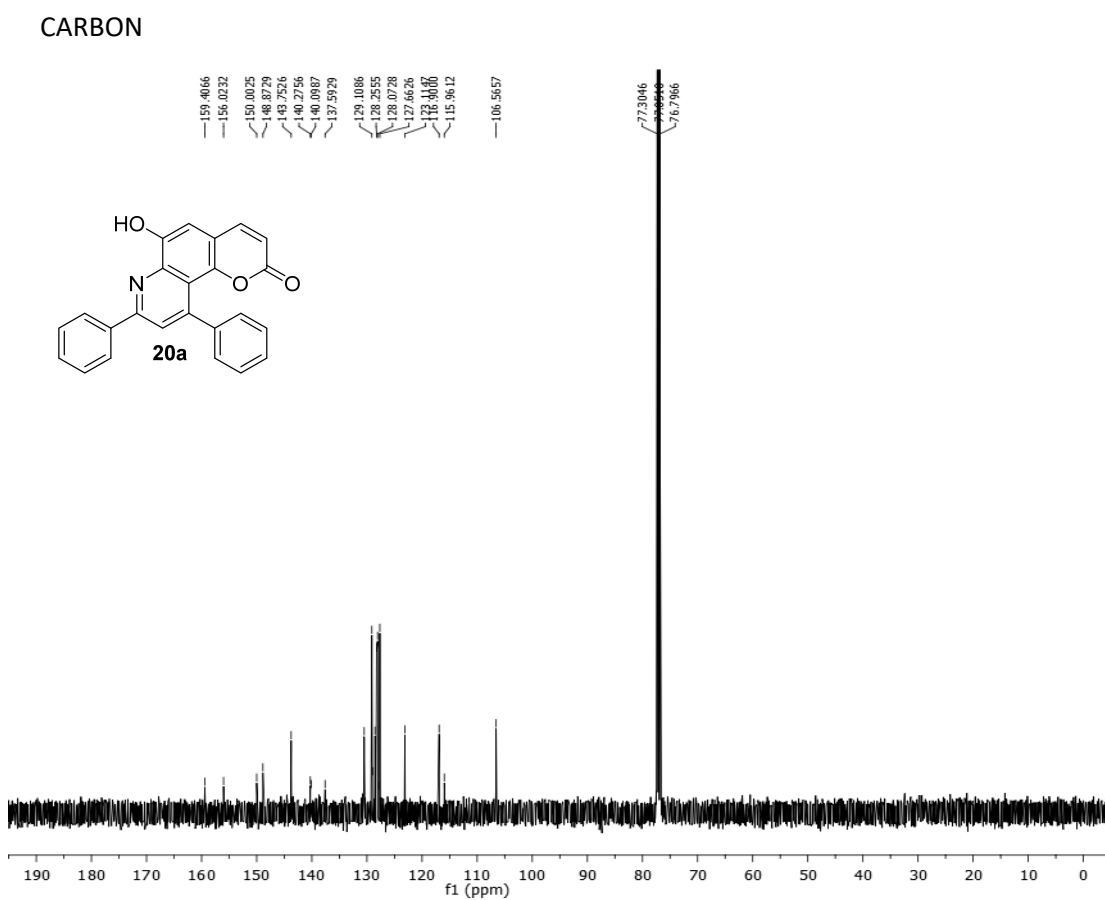

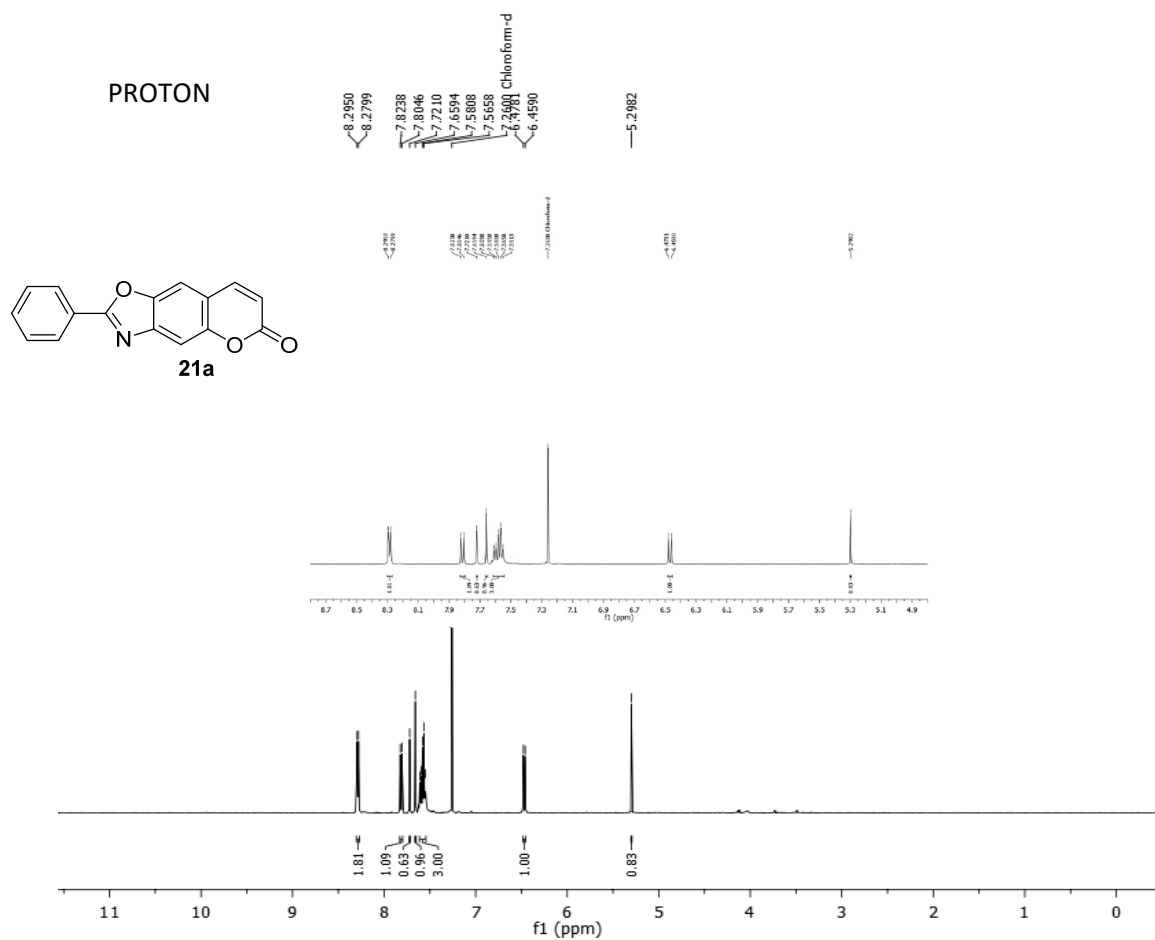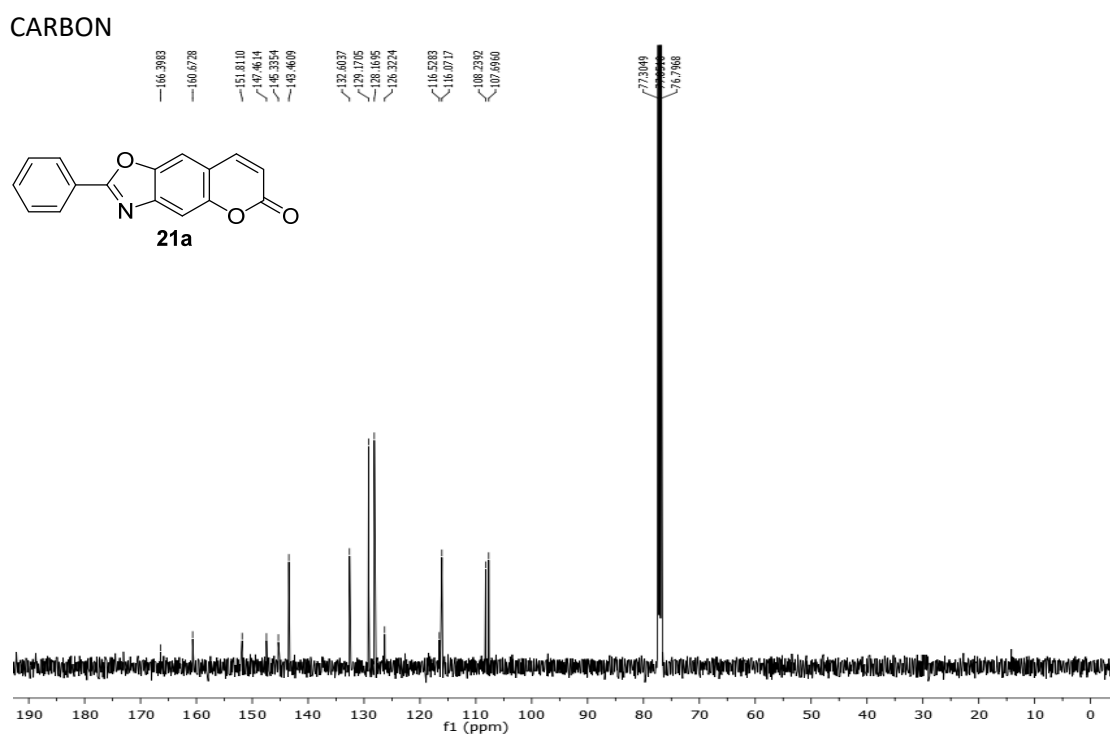

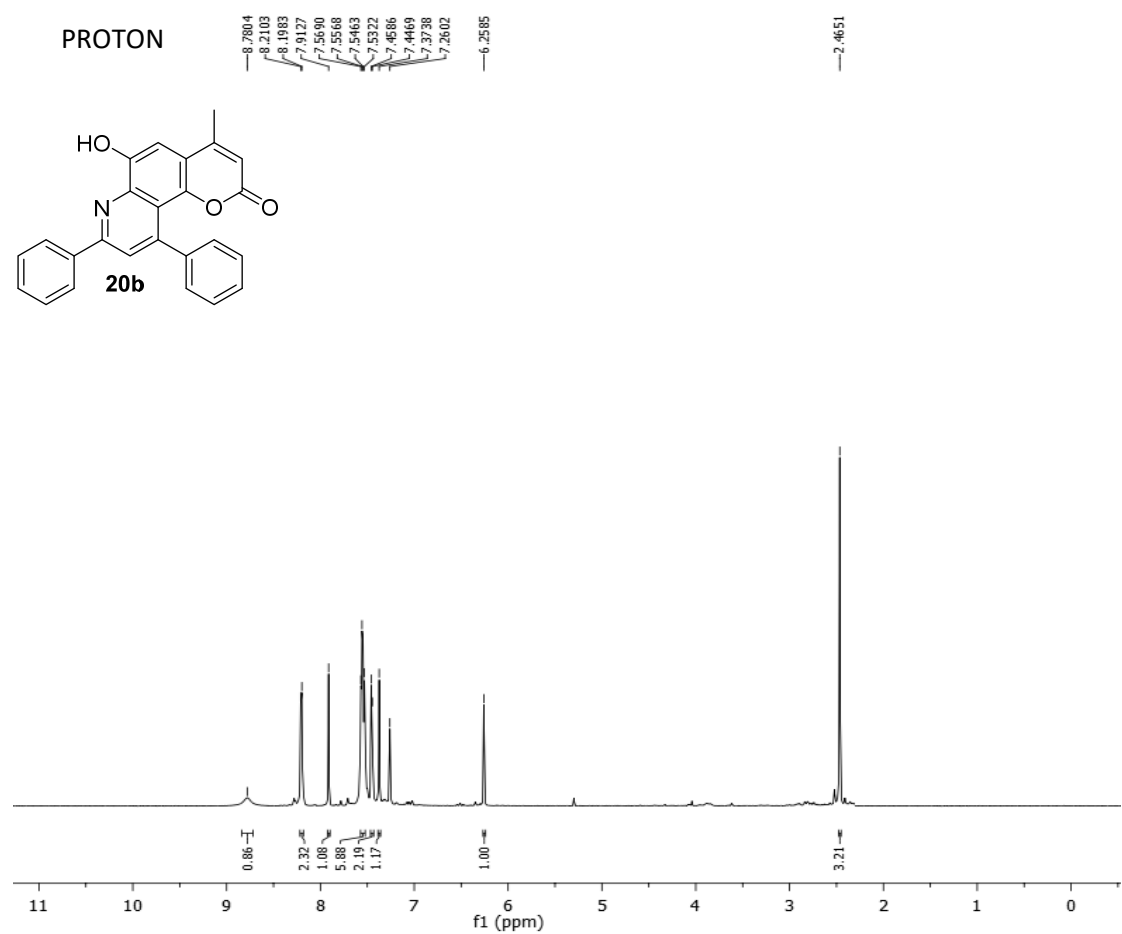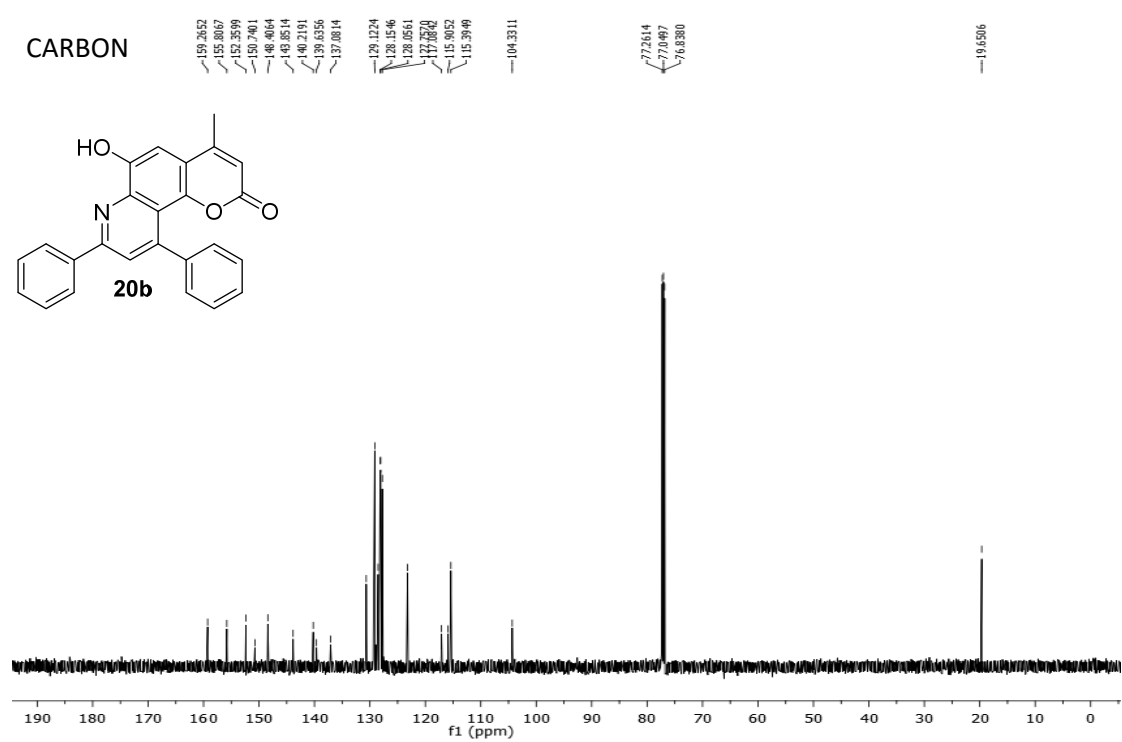

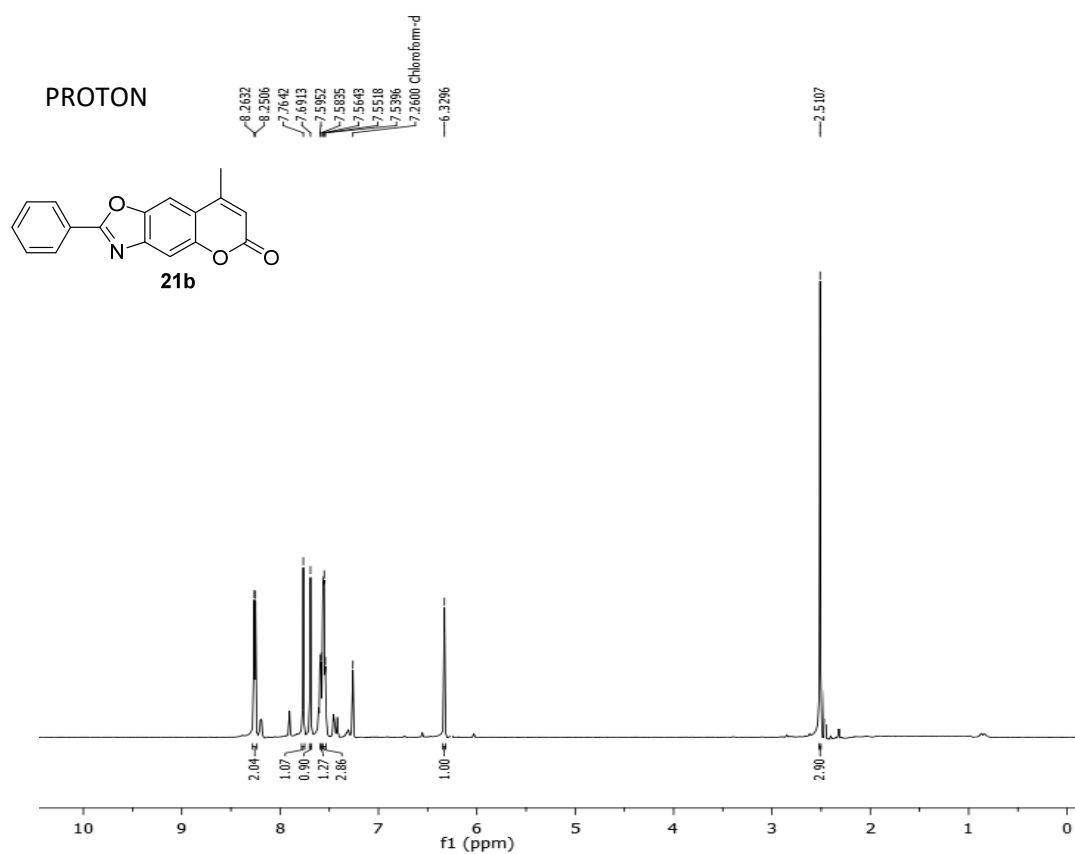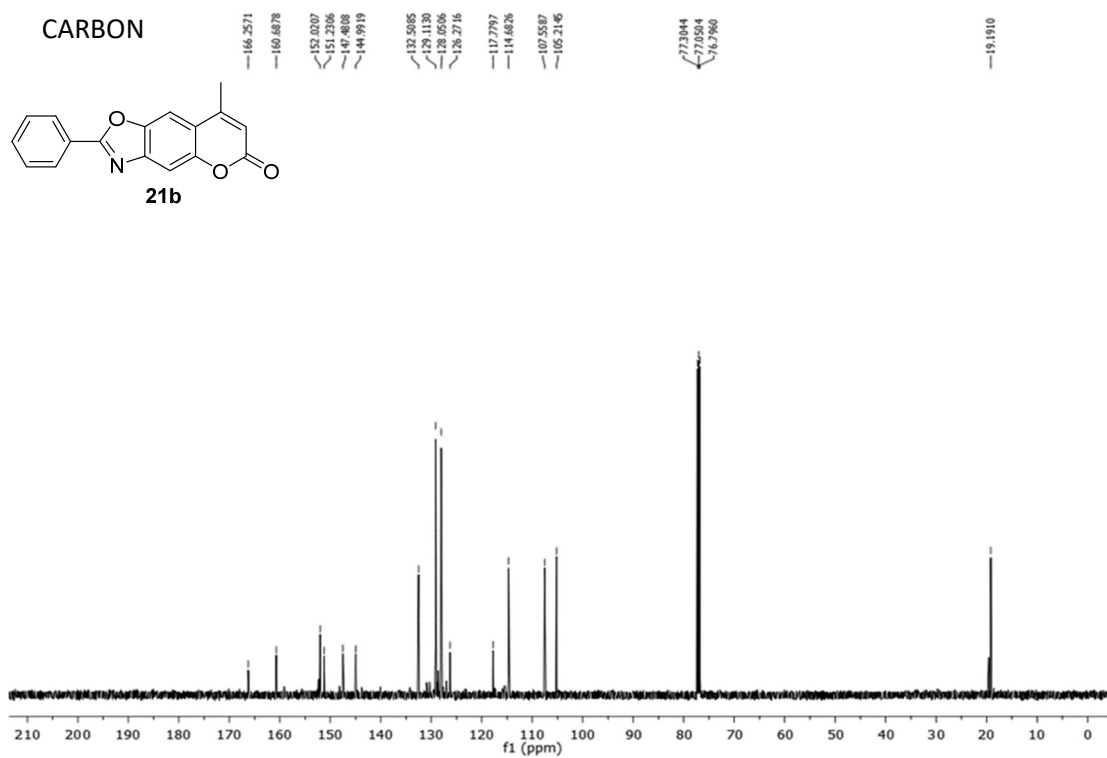

# PROTON

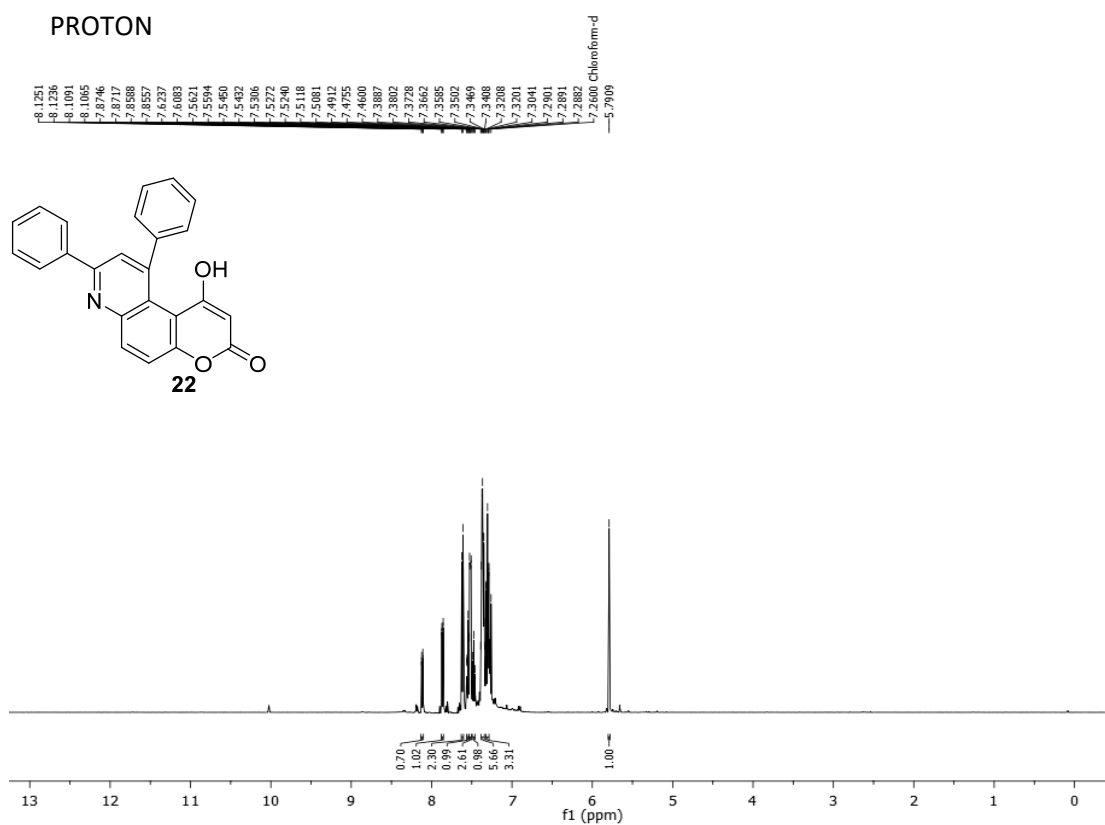

# CARBON

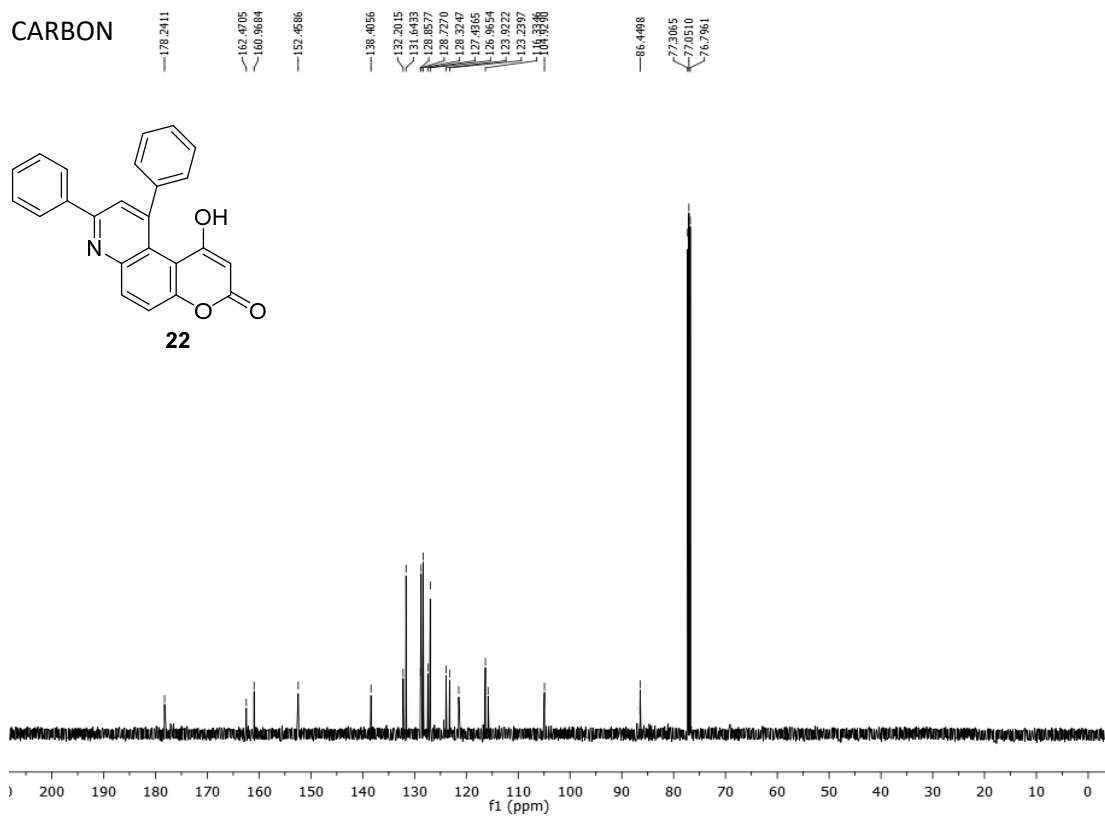

# PROTON

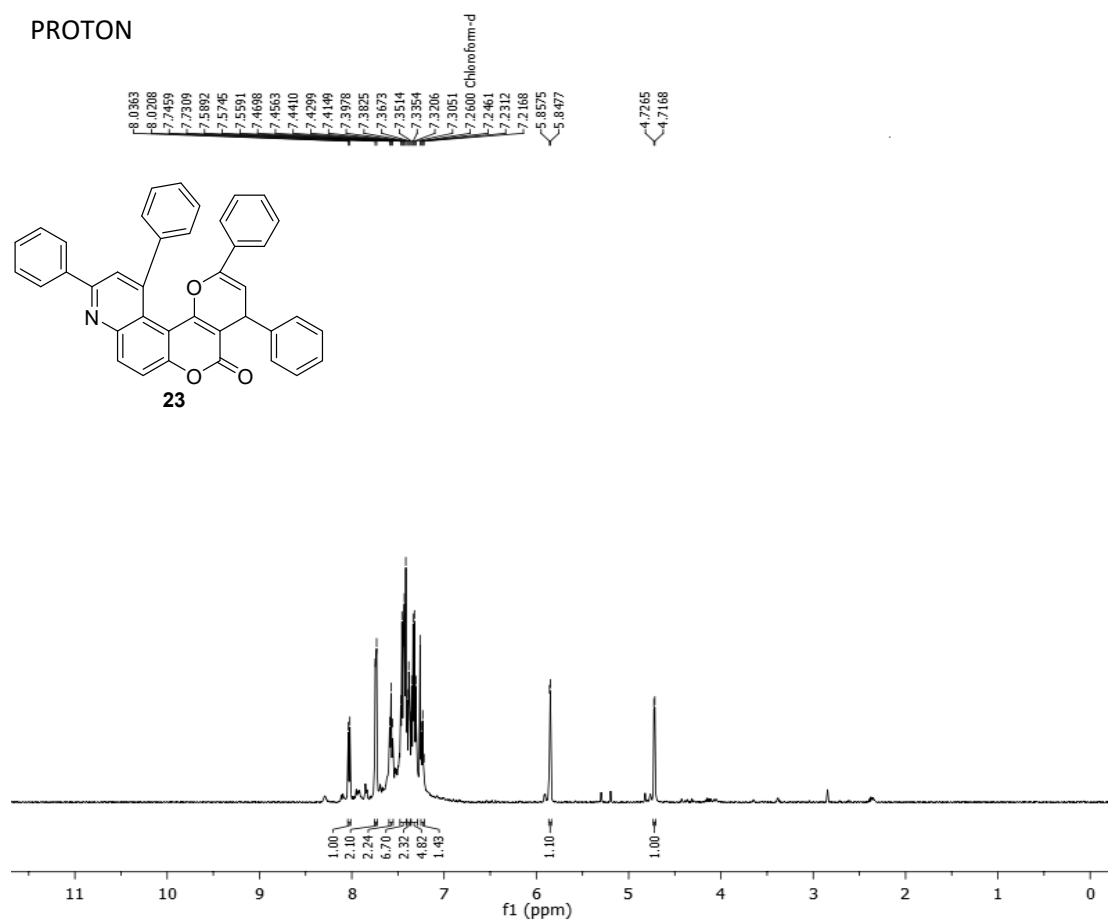

# CARBON

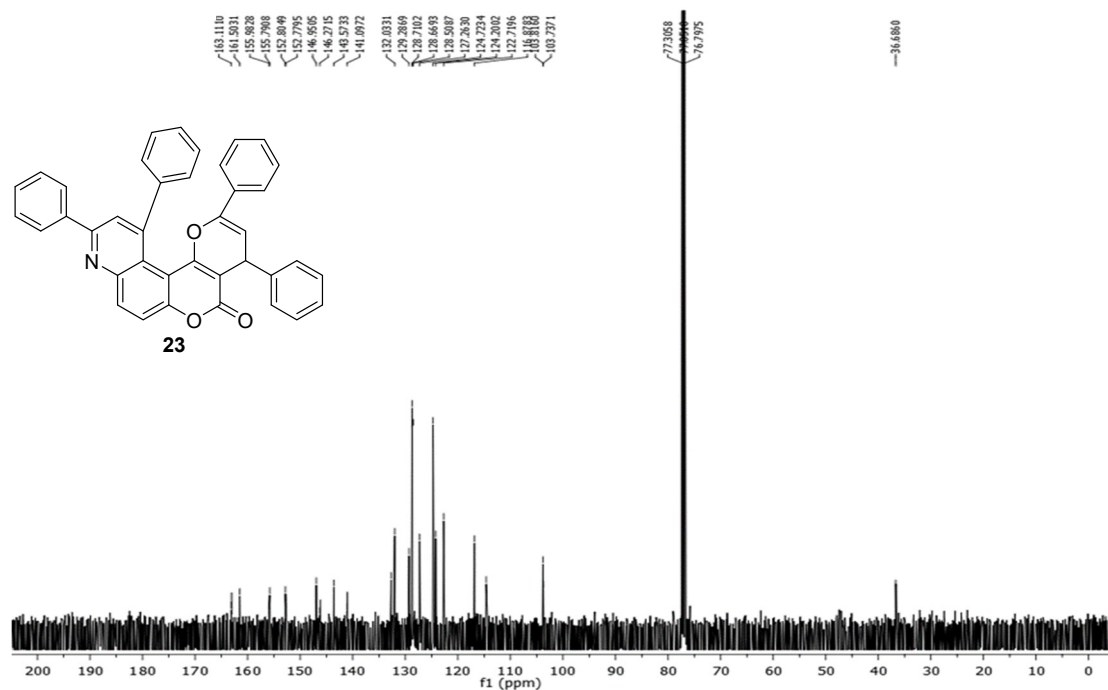

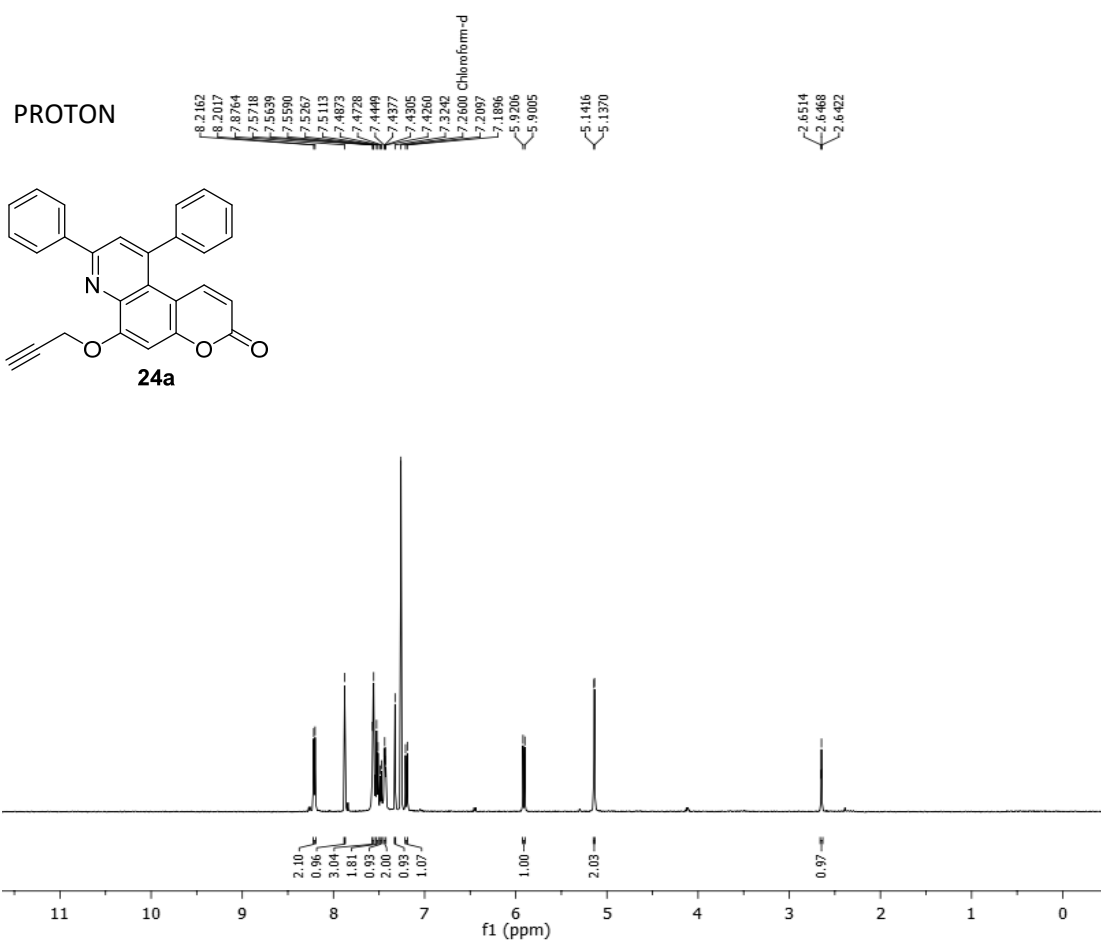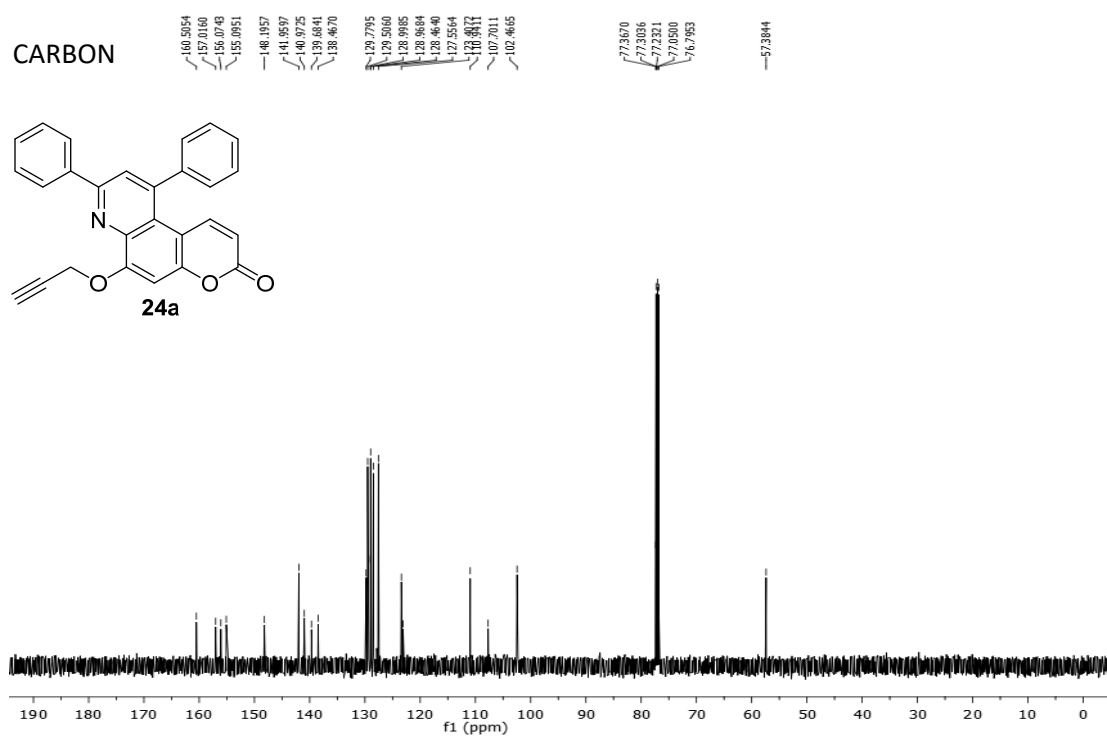

PROTON

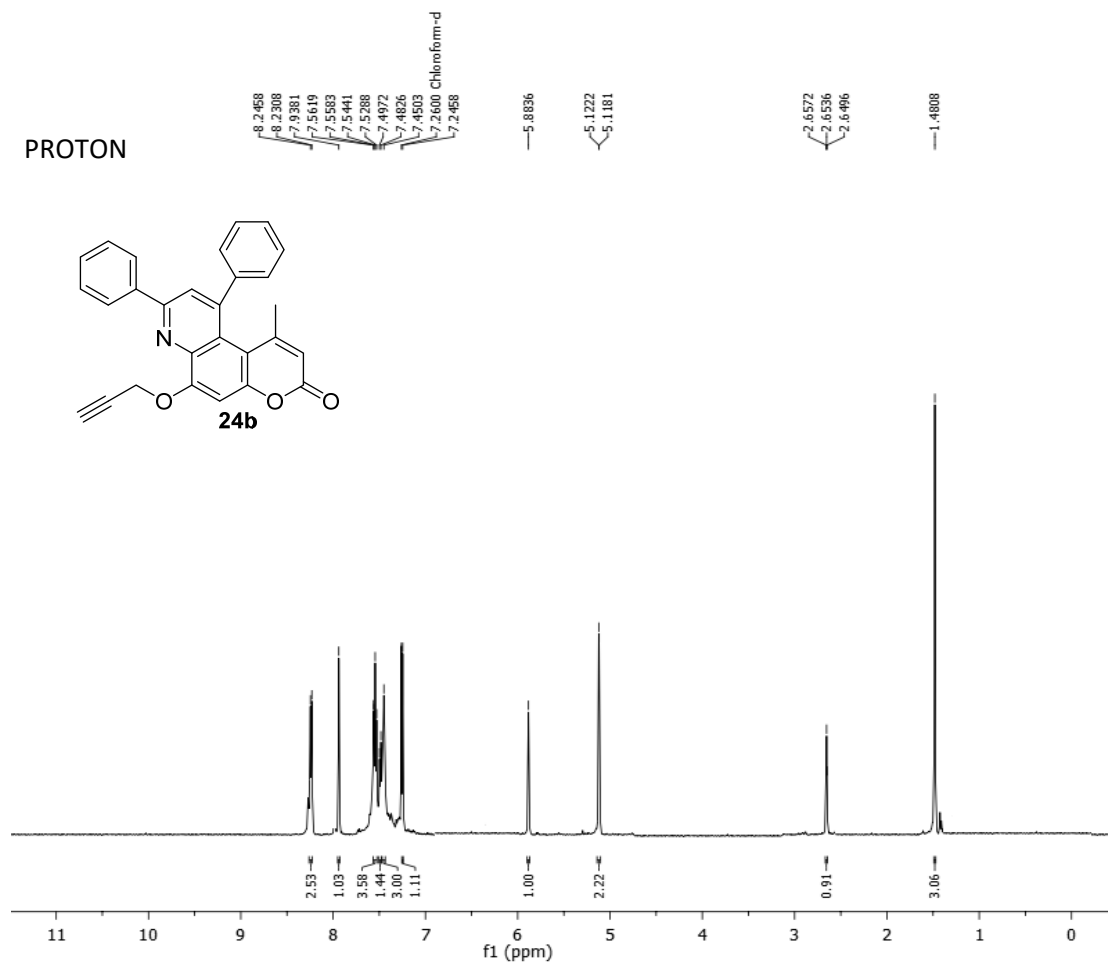

Εικόνα 1

CARBON

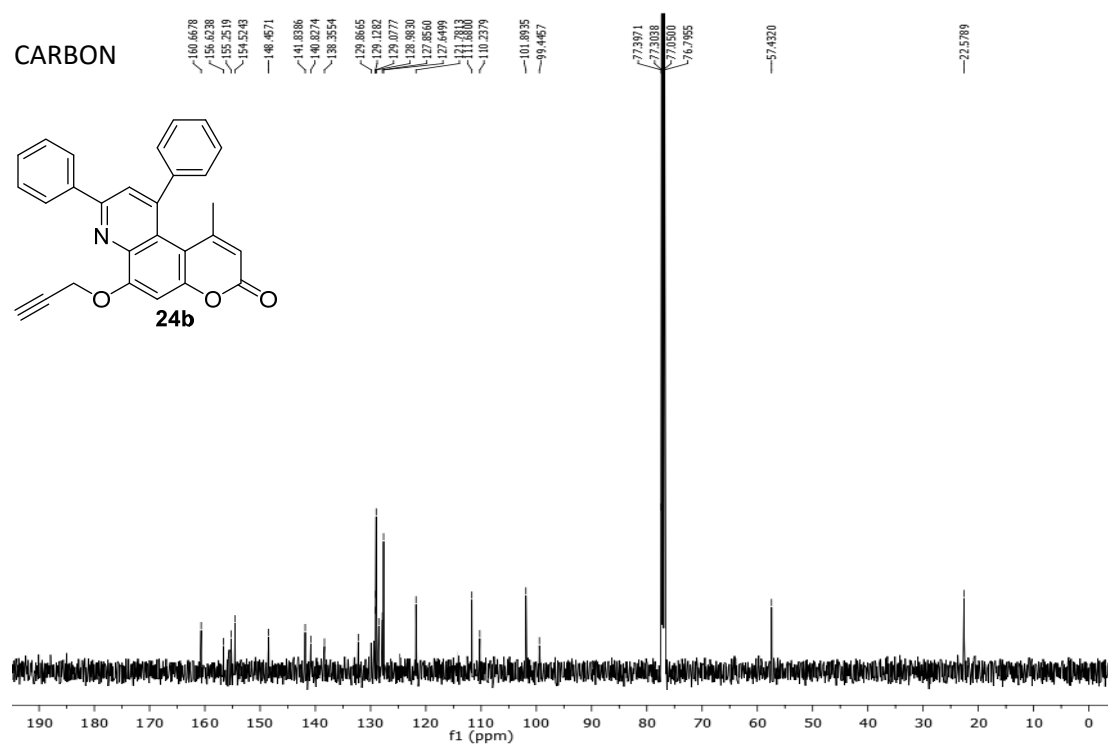



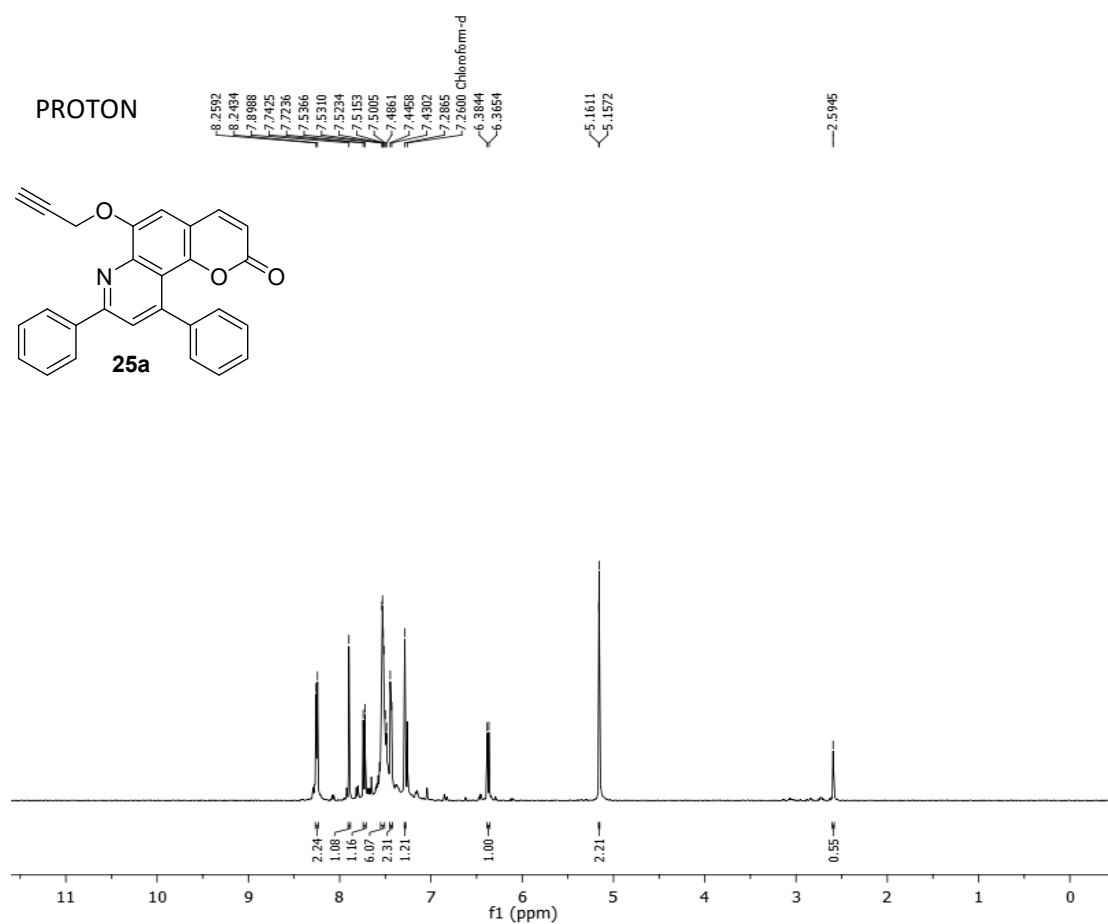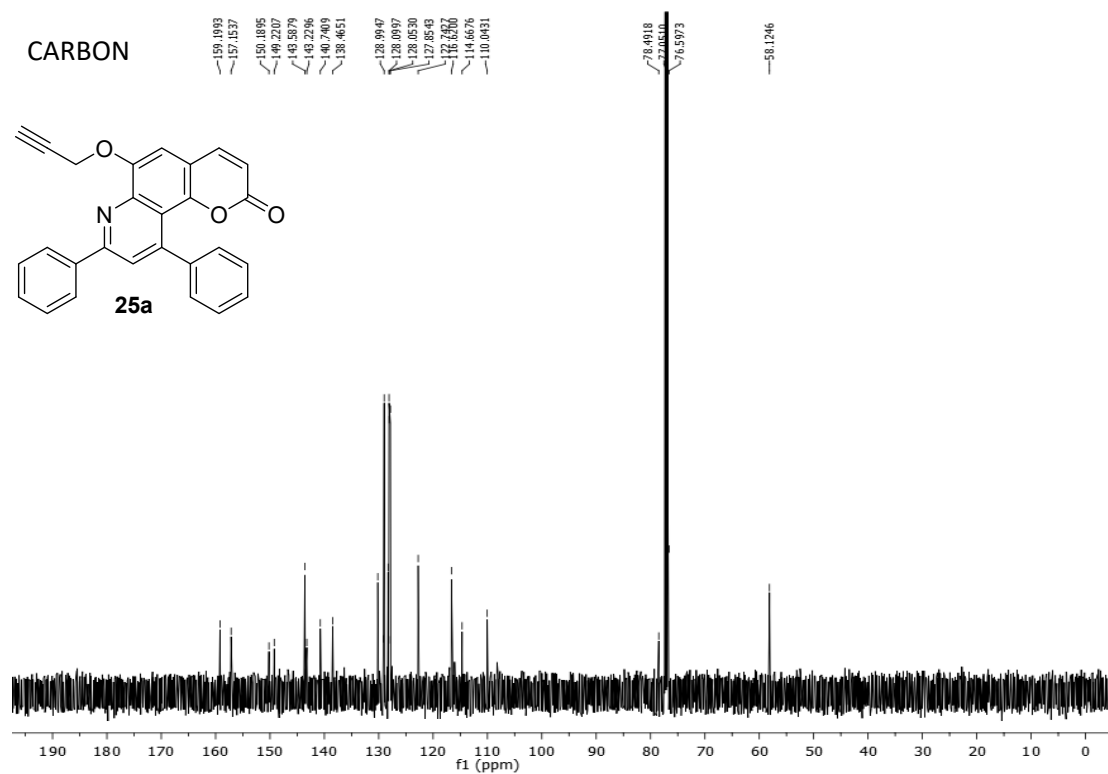

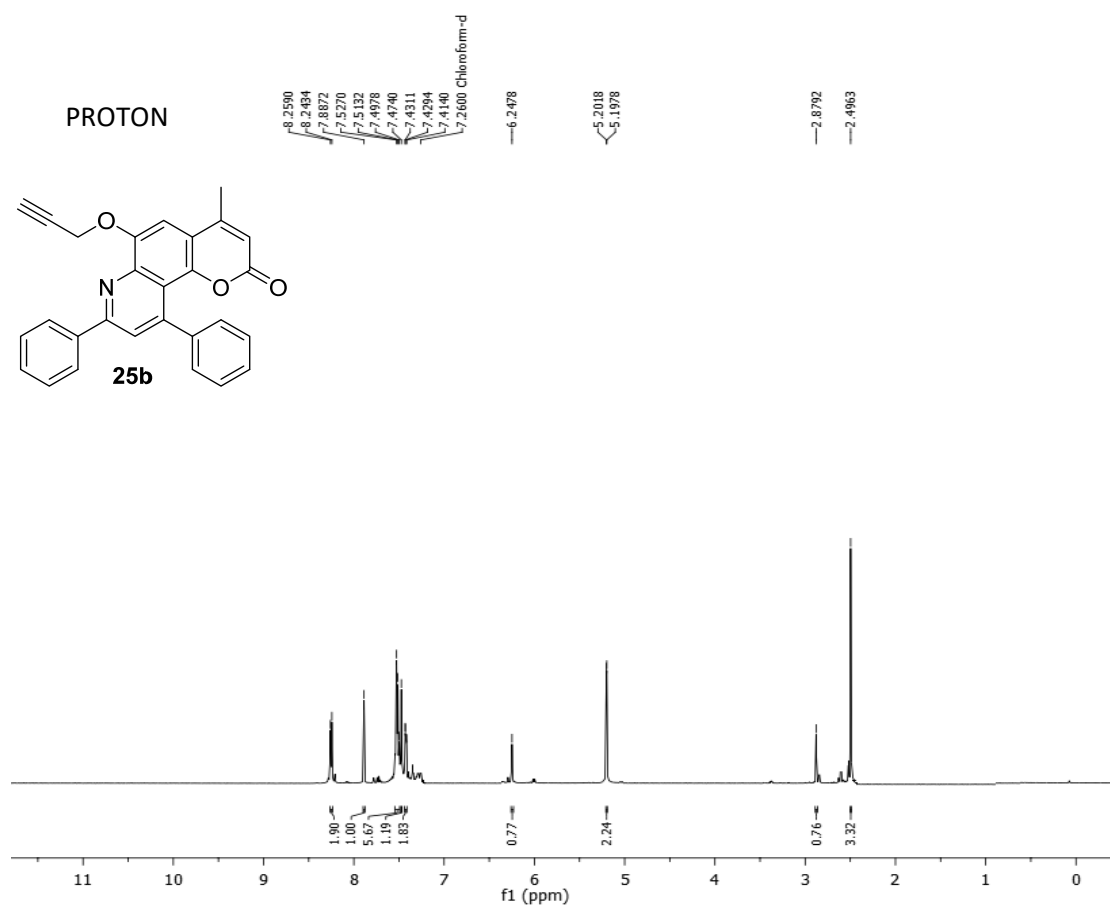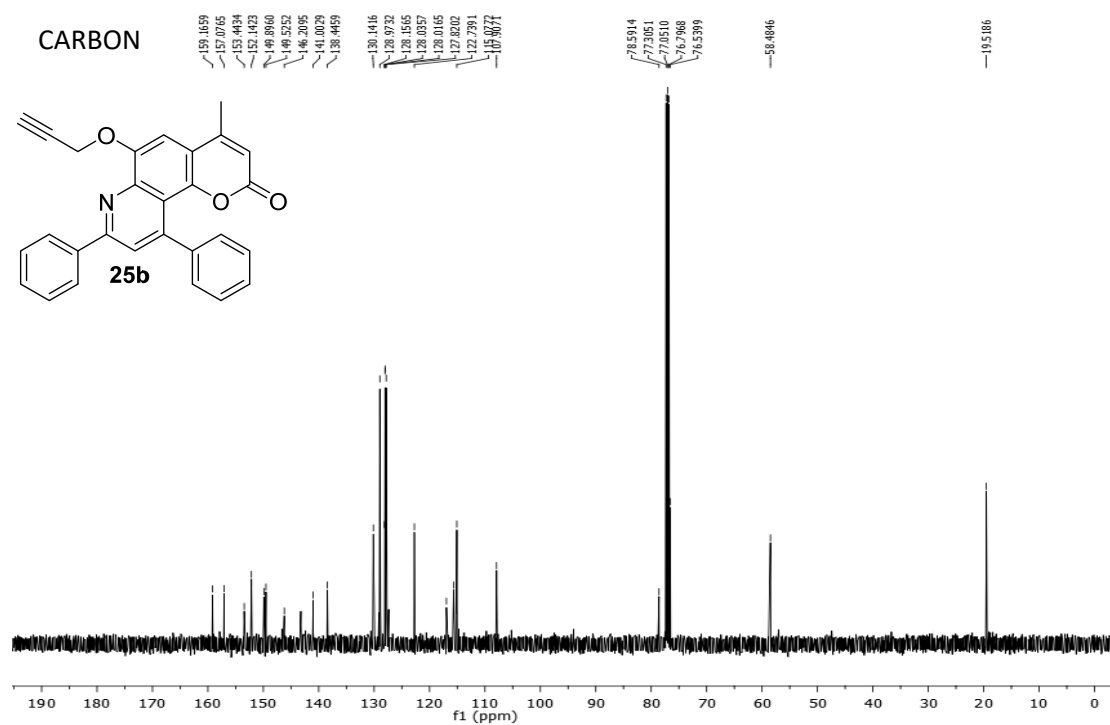

# PROTON

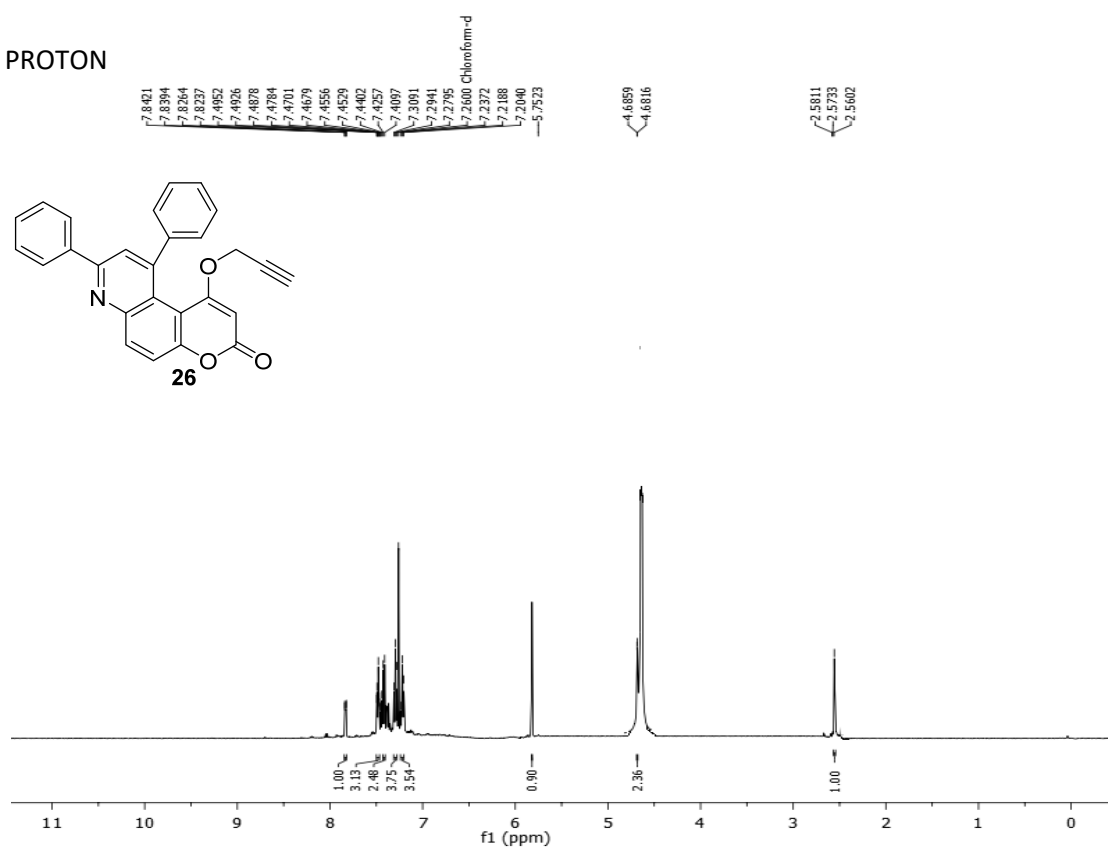

# CARBON

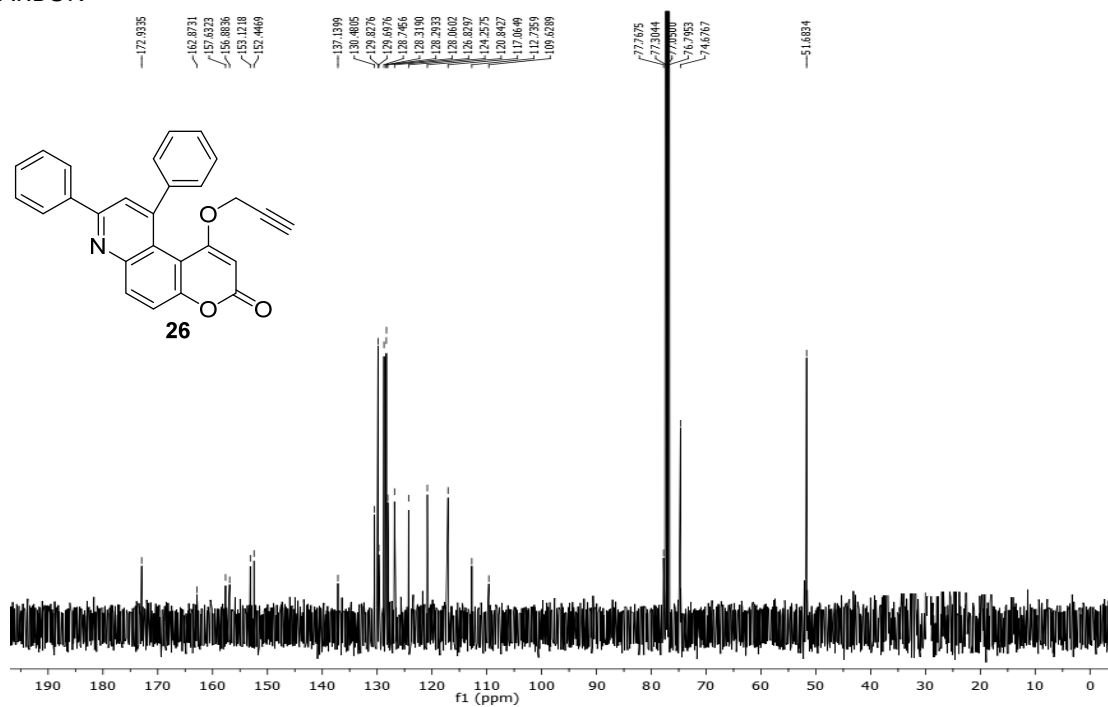

# PROTON

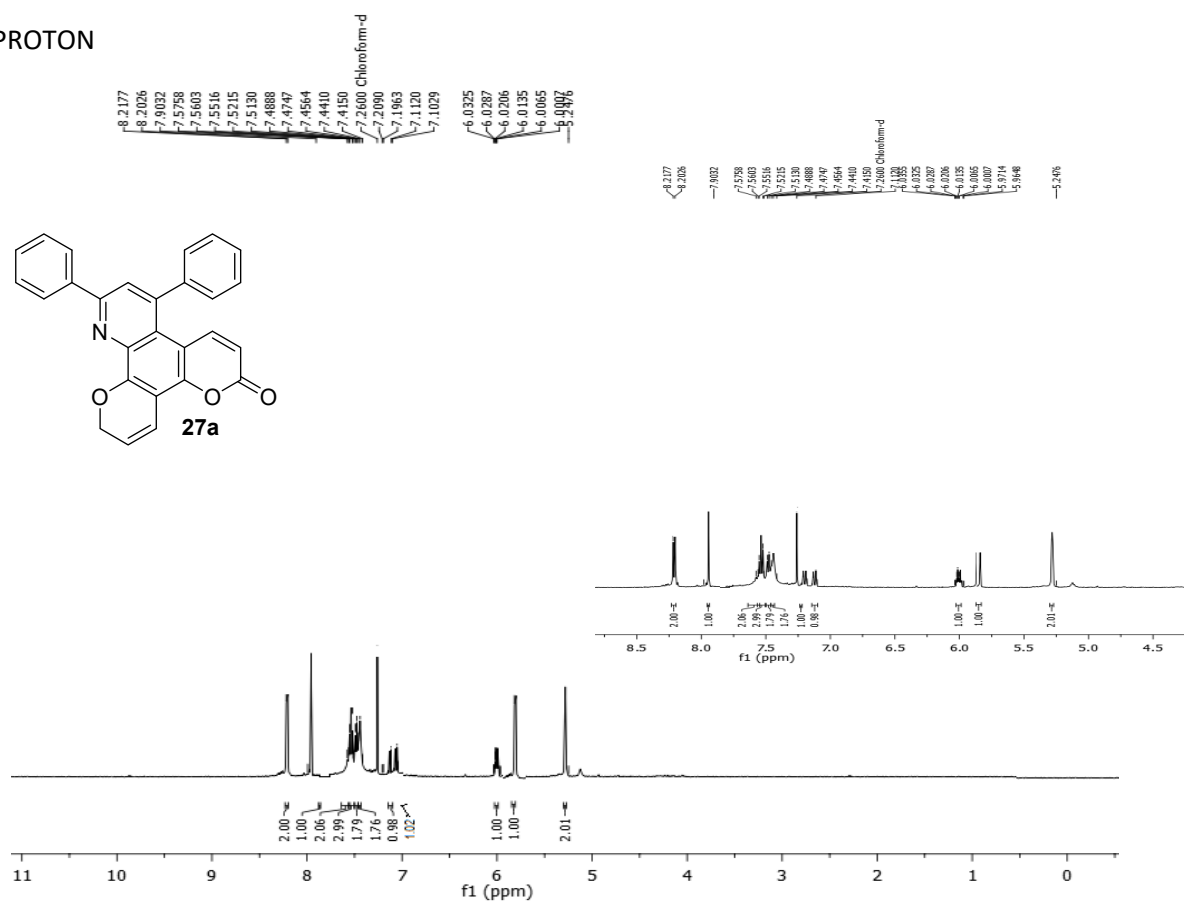

# CARBON

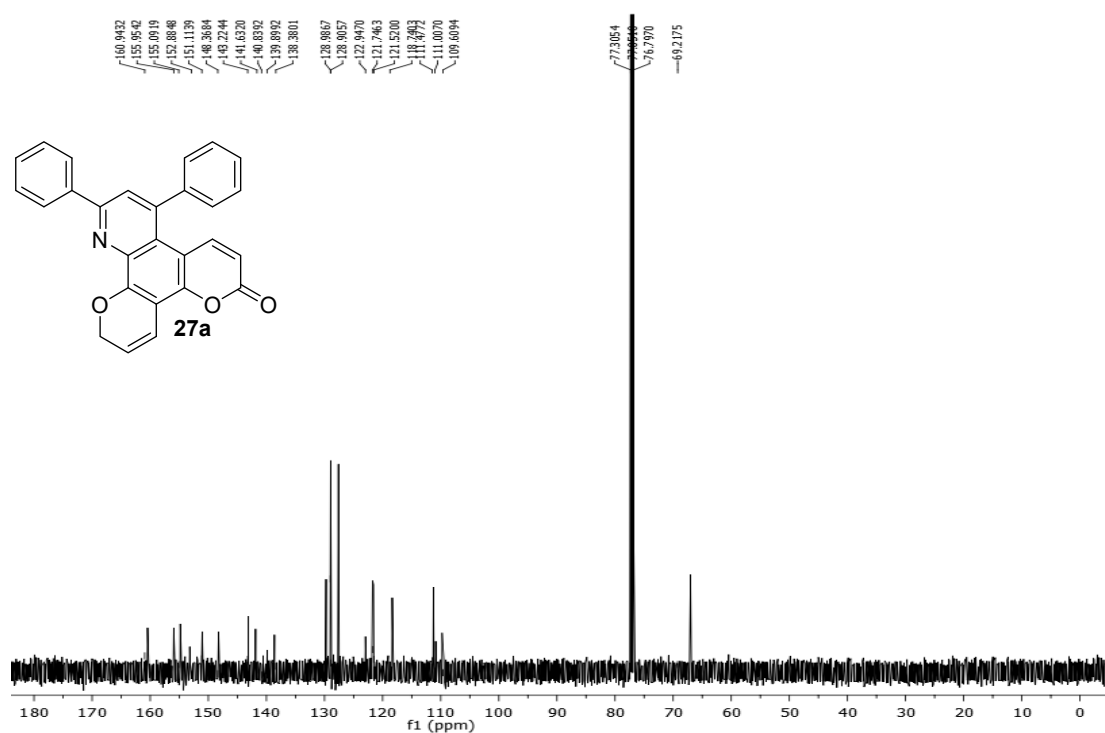

# PROTON

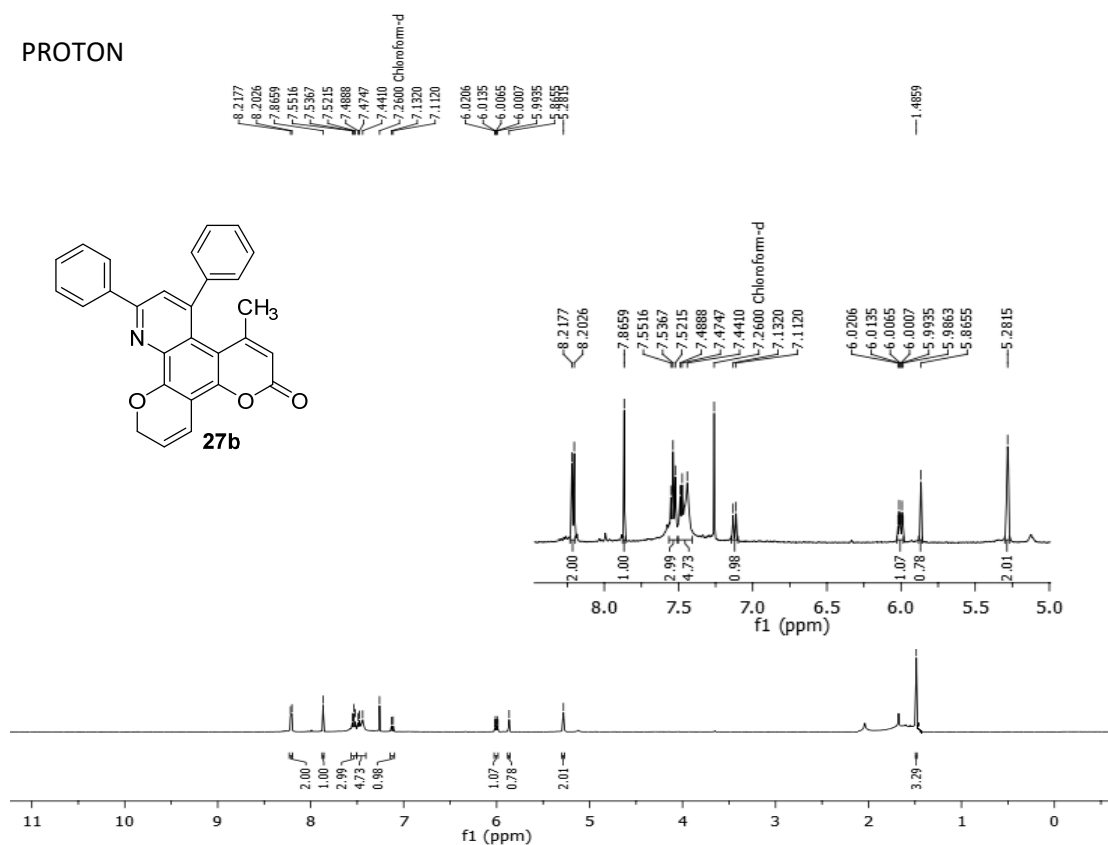

# CARBON

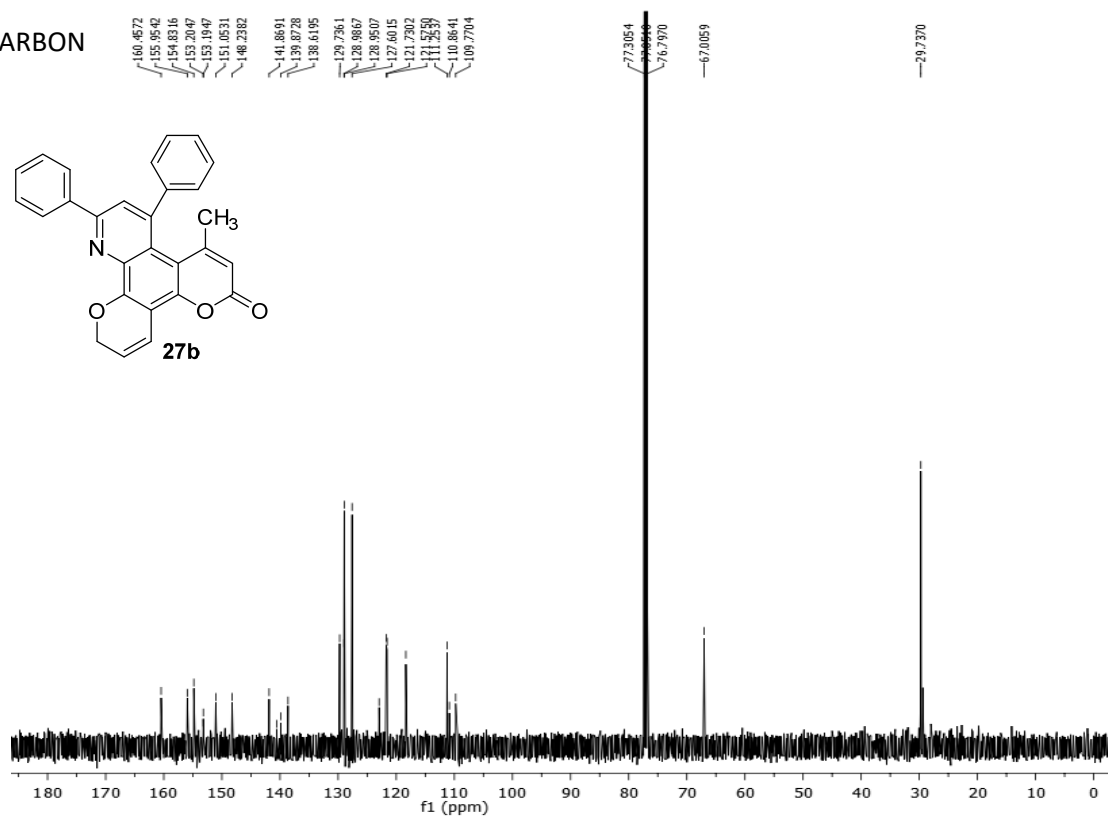

# PROTON

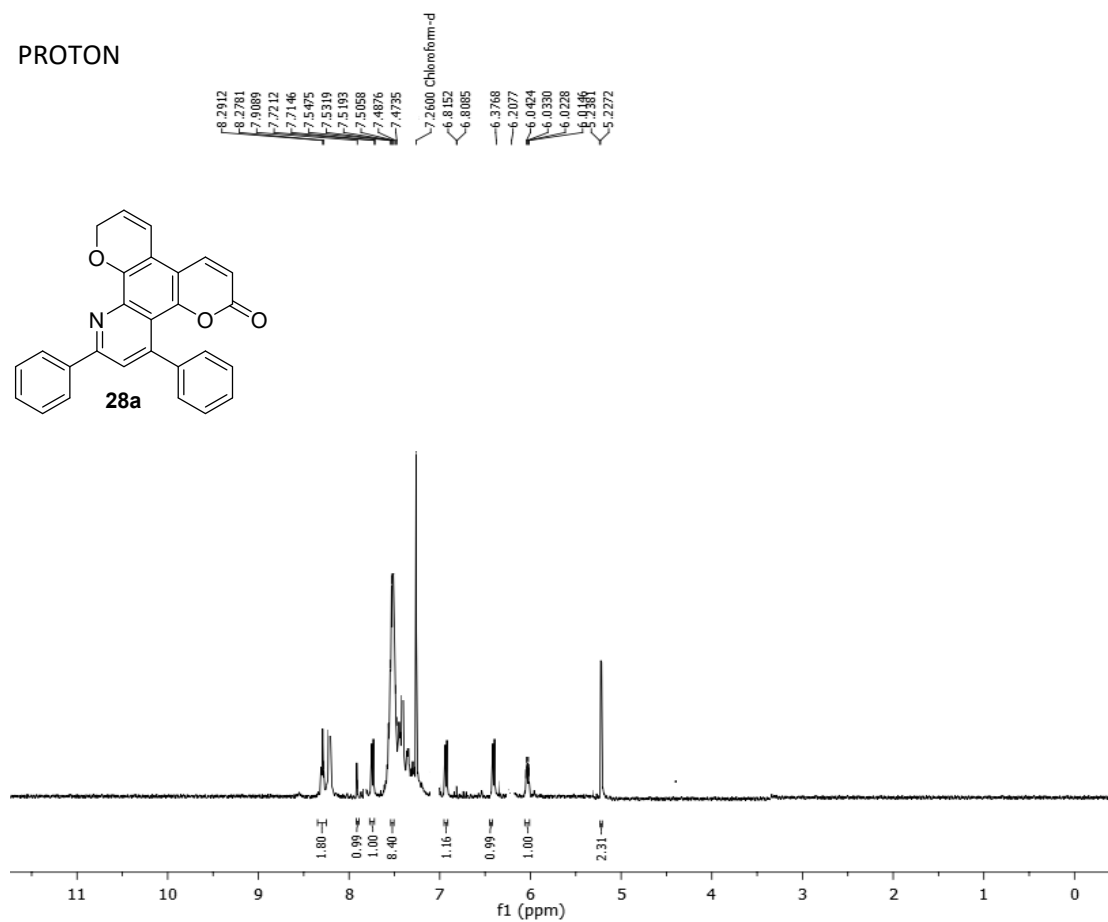

# CARBON

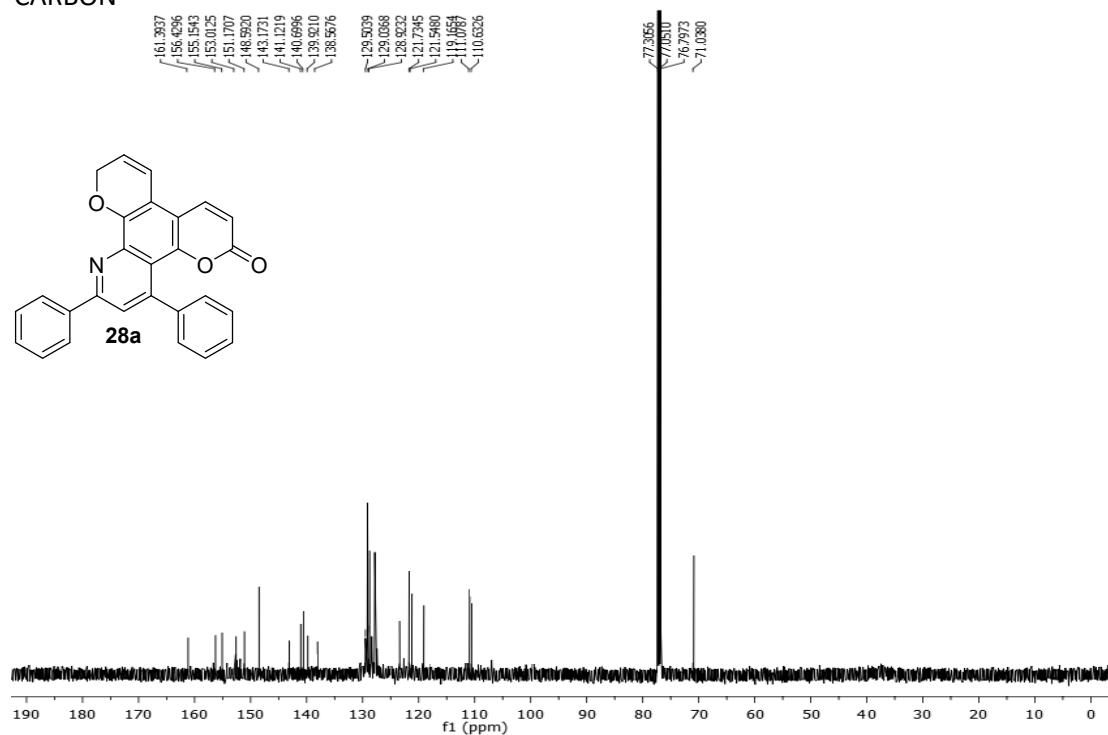

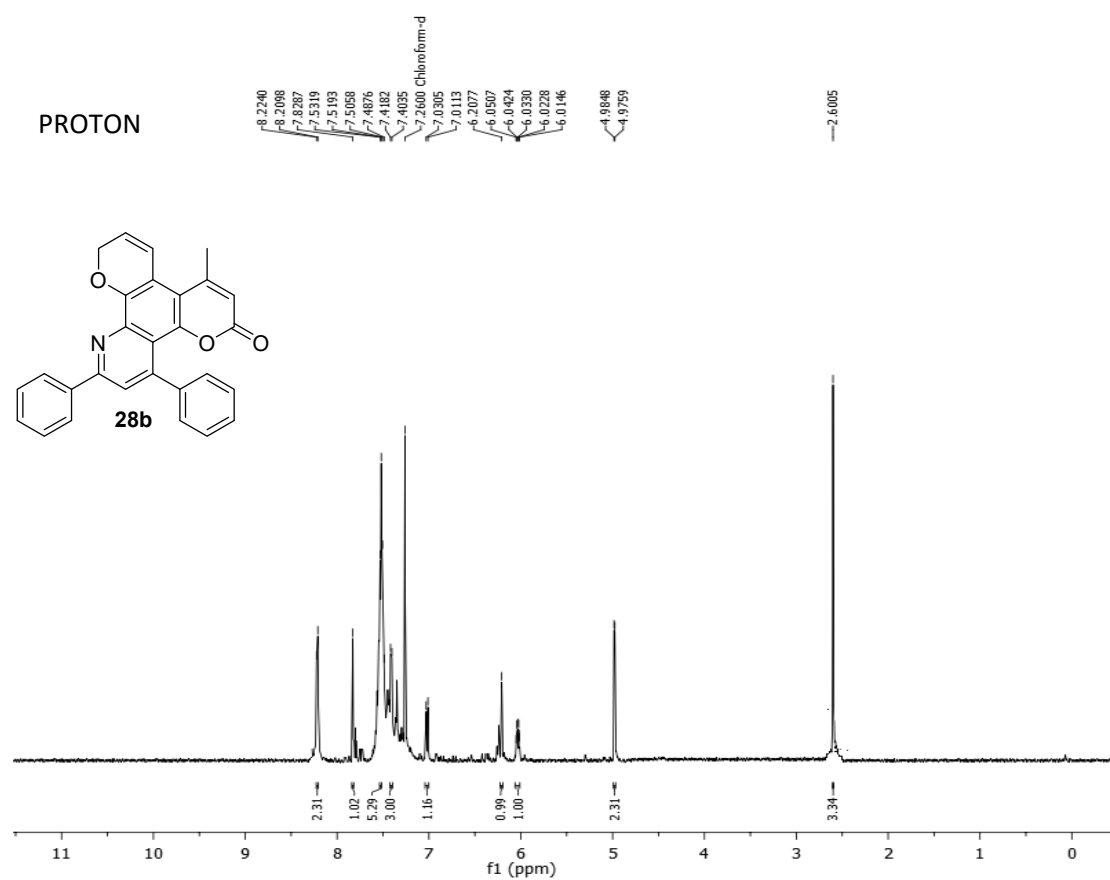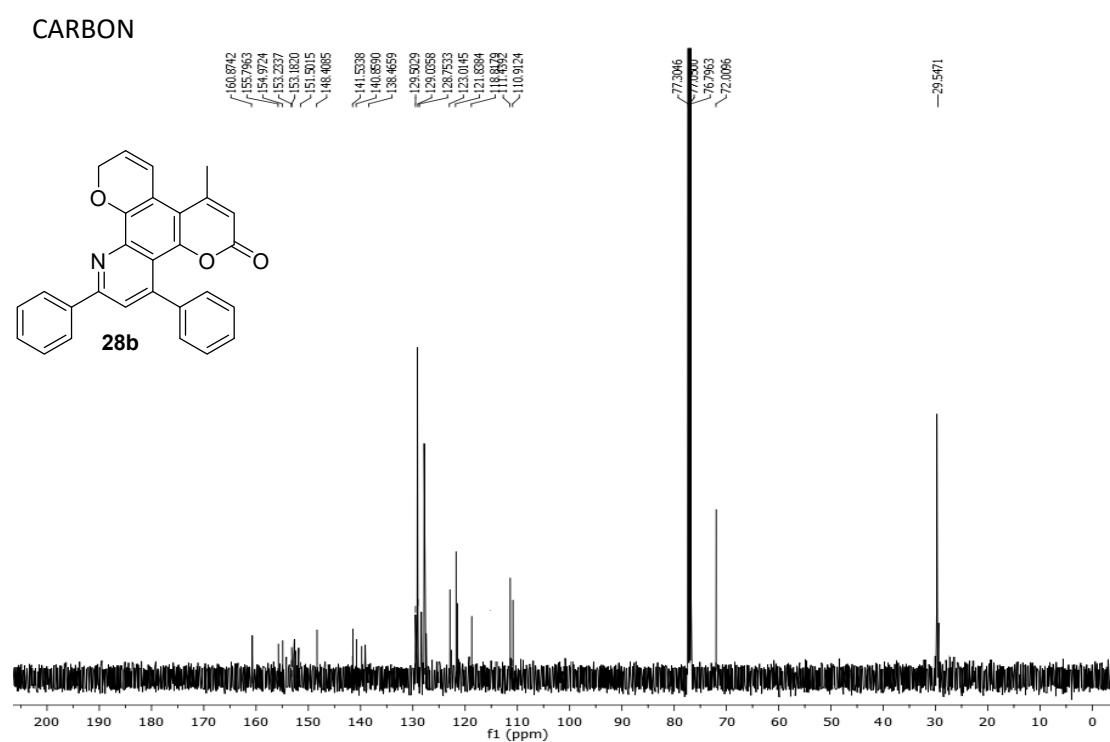

# PROTON

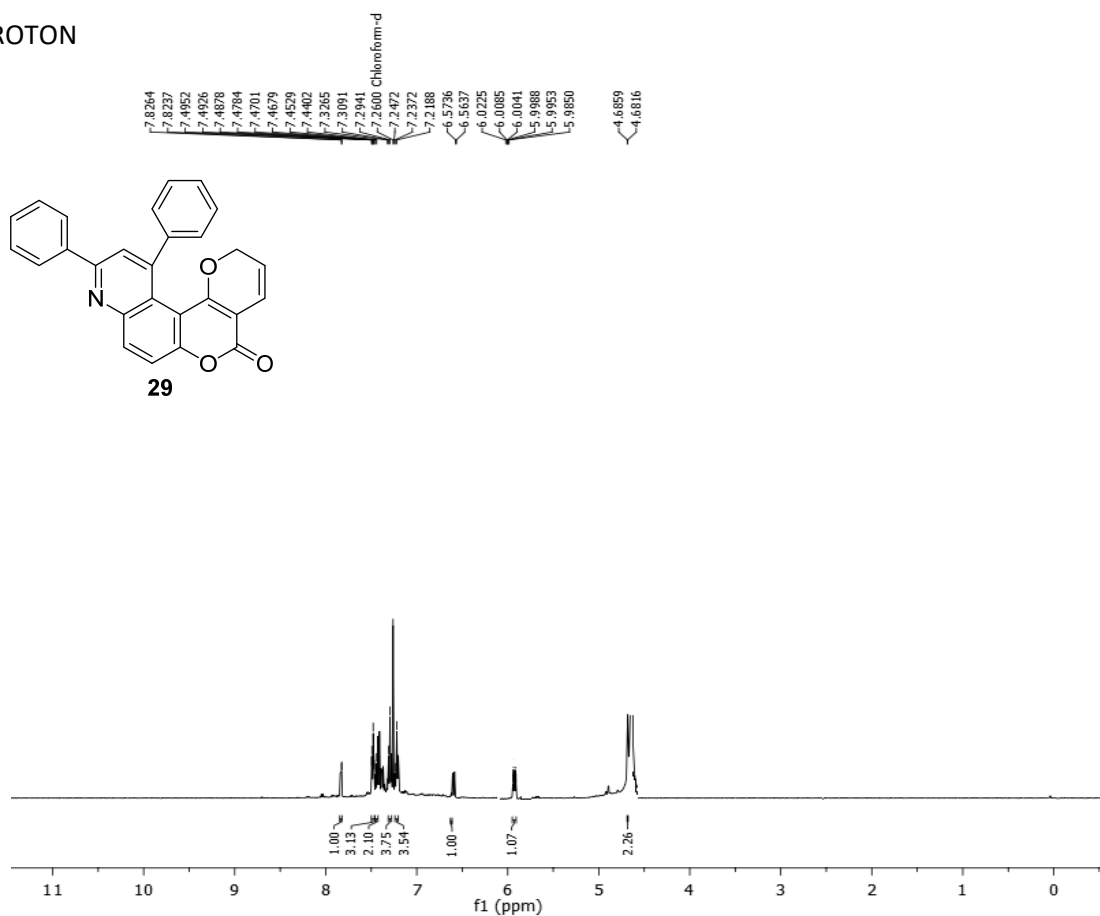

# CARBON

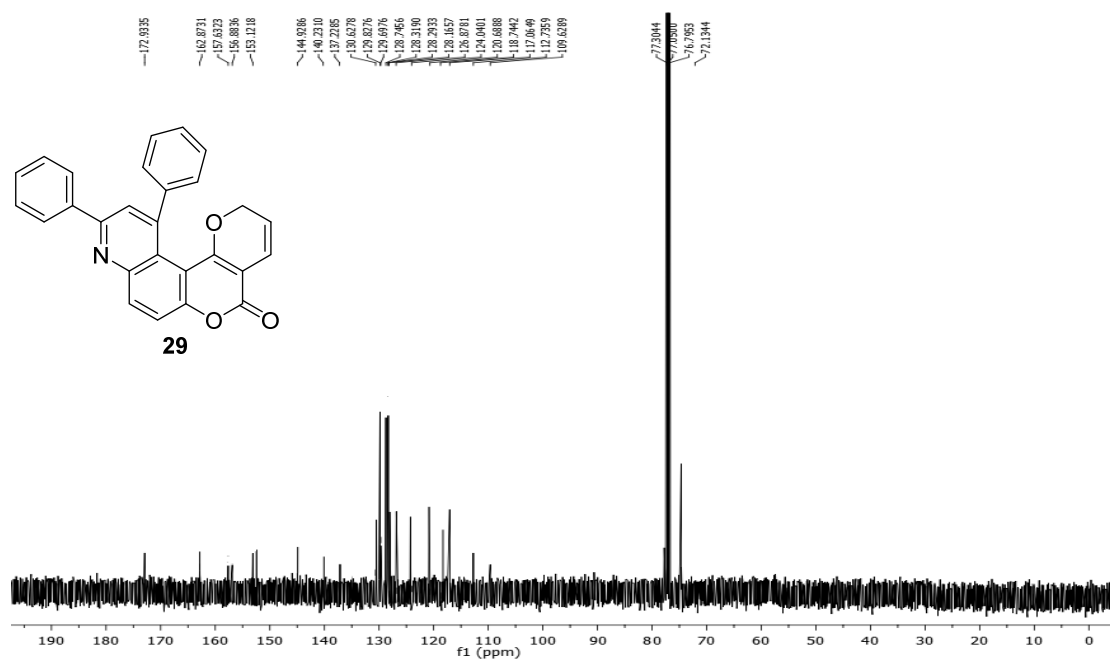

Supplement: s1 [file s1]
